# Supplementary material for: Identification of neoantigens and immunological subtypes in clear cell renal cell carcinoma for mRNA vaccine development and patient selection
Source: publisher site journal article supplement (doi:10.18632/aging.204798), 2023-06-13
Supplement: Supplementary file [file aging-v15i11-204798-supplementary-material-SD1.pdf]

# SUPPLEMENTARY FIGURES

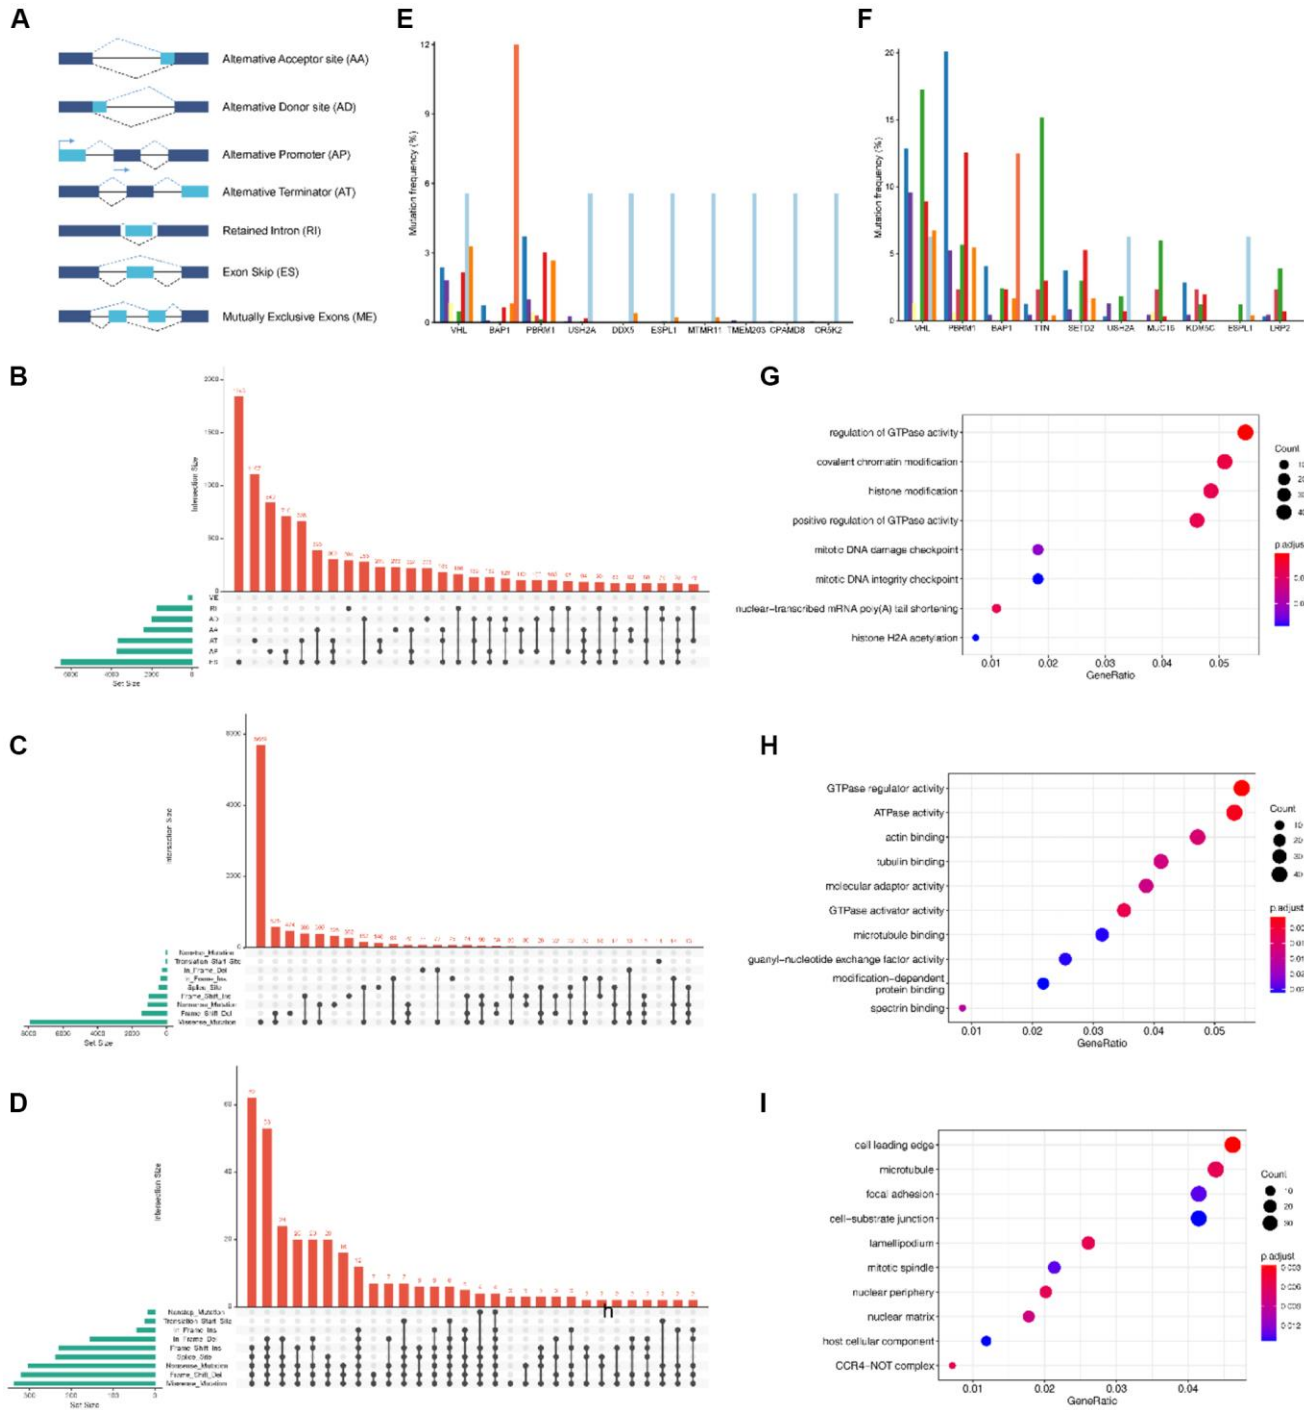

**Supplementary Figure 1. Potential antigen identification and enrichment of gene ontology (GO).** (A) Seven AS events in ccRCC patients. (B) Number of genes involved in AS events. (C, D) Frequency of somatic mutations and genes/patients involved. (E, F) The mutation frequency of top 10 genes in all samples/ccRCC patients. (G–I) biological process (BP), molecular function (MF), and cellular component (CC) enrichment of 901 potential antigens.

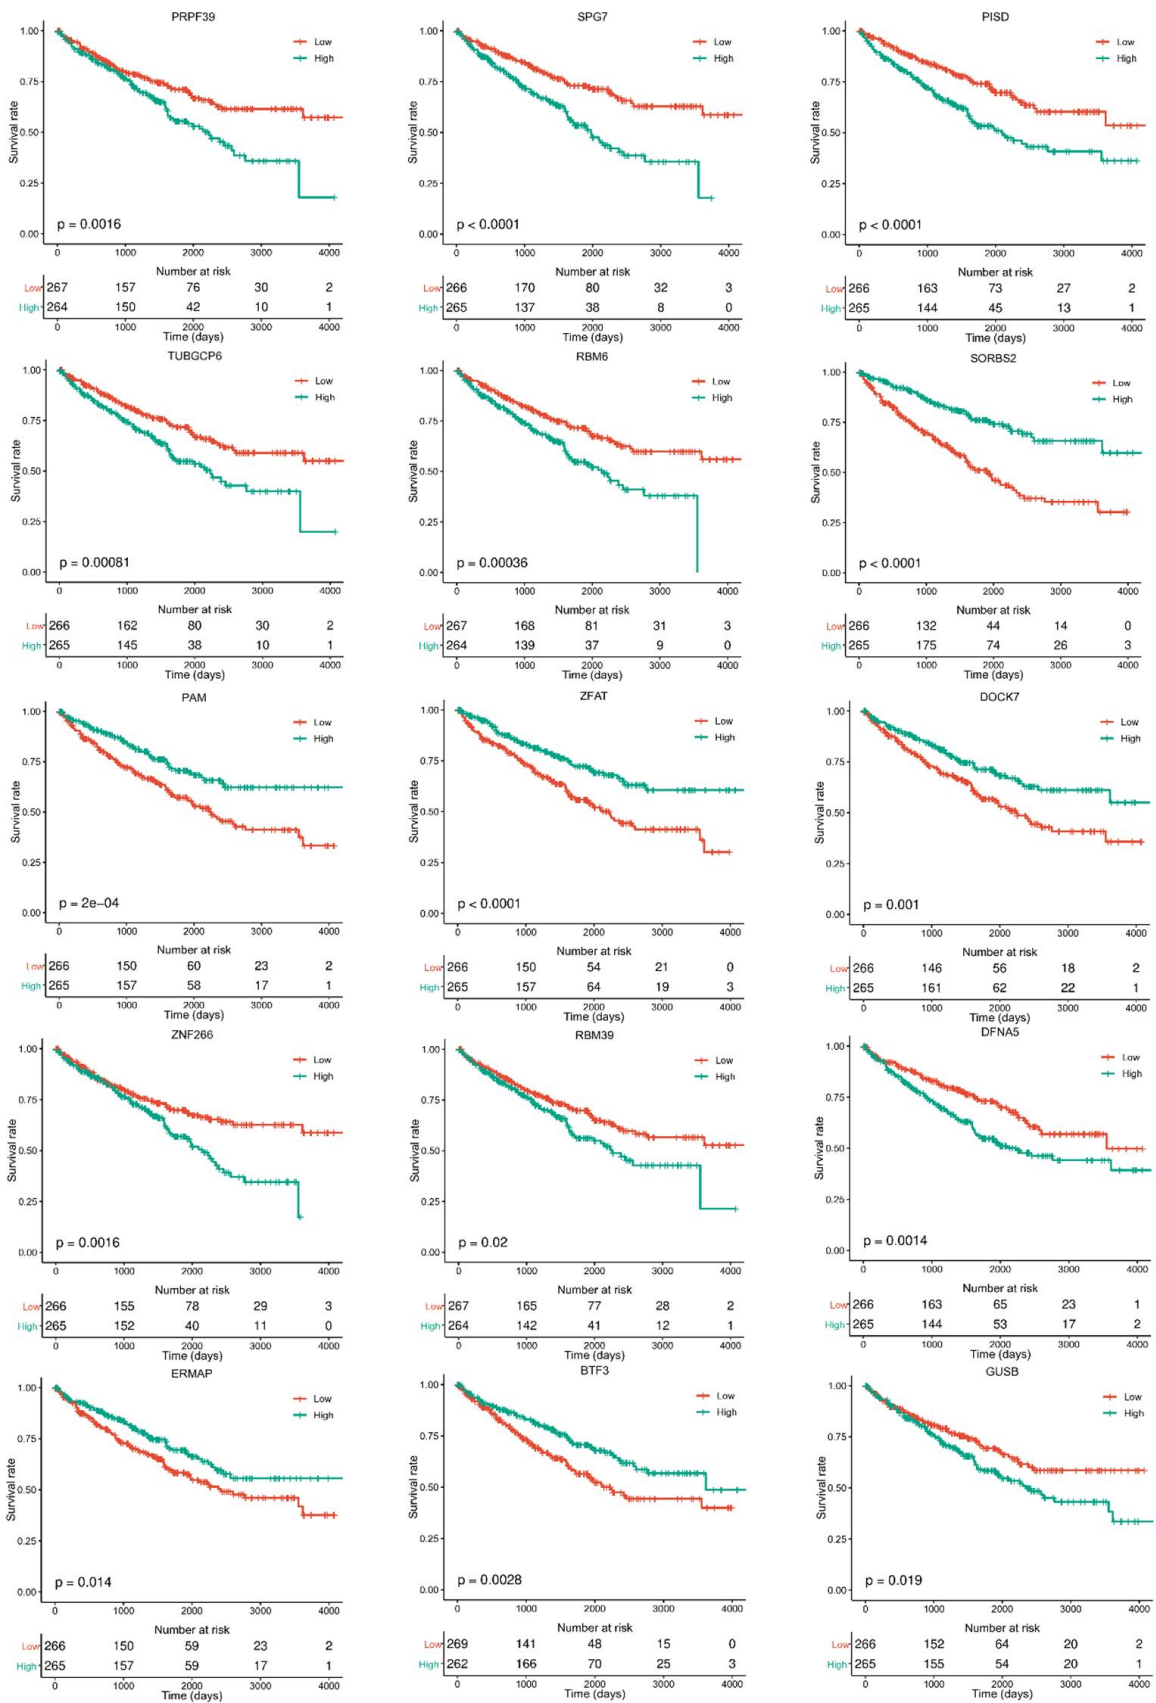

**Supplementary Figure 2. Fifteen candidates significantly associated with the overall survival rate.** Effect of PRPF39, SPG7, PISD, TUBGCP6, RBM6, SORBS2, PAM, ZFAT, DOCK7, ZNF266, RBM39, DFNA5, ERMAP, BTF3, and GUSB on overall survival rate.

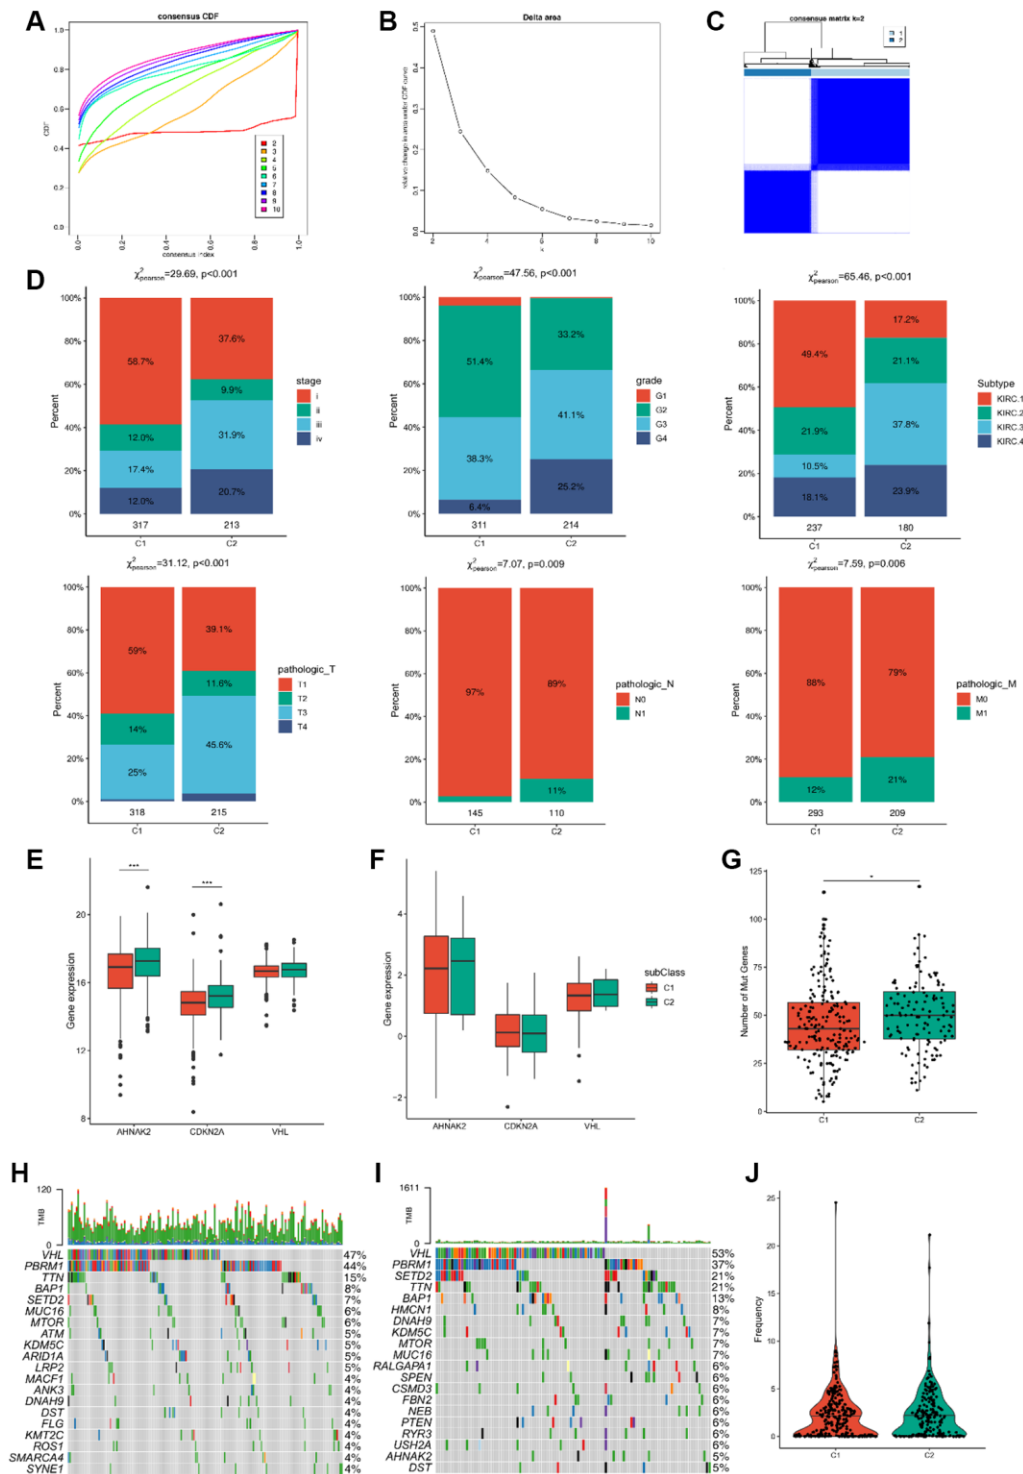

**Supplementary Figure 3. Identification of potential immune subtypes of ccRCC patients.** (A) Cumulative distribution function curve and (B) delta area of immune-related genes in TCGA cohort. (C) Sample clustering heat map. (D) Distribution of C1/C2 across ccRCC stages, grades, molecular subtypes, T, N, M staging of TCGA cohort. (E, F) The expression of ccRCC patient biomarkers in C1/C2 subtypes. (G) Number of mutated genes in C1/C2 ccRCC patients. (H, I). Twenty highly mutated genes in C1/C2 ccRCC patients. (J) CNV frequency of C1/C2 ccRCC patients.

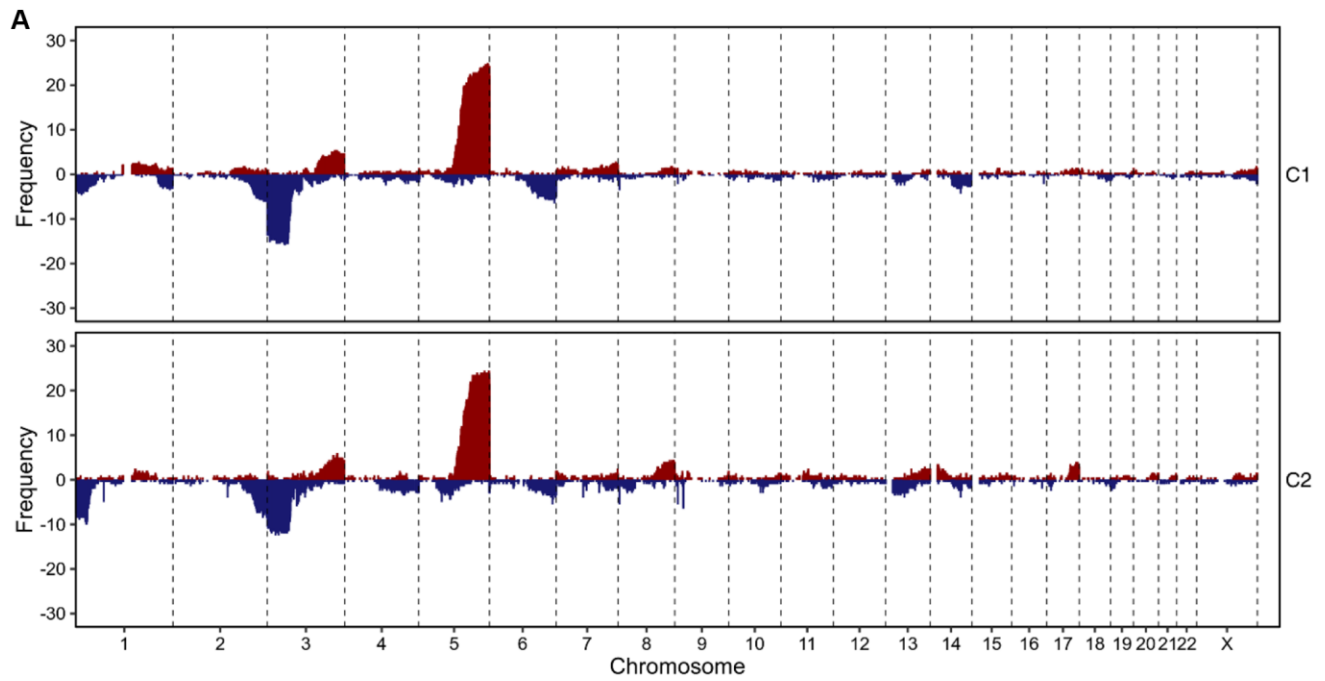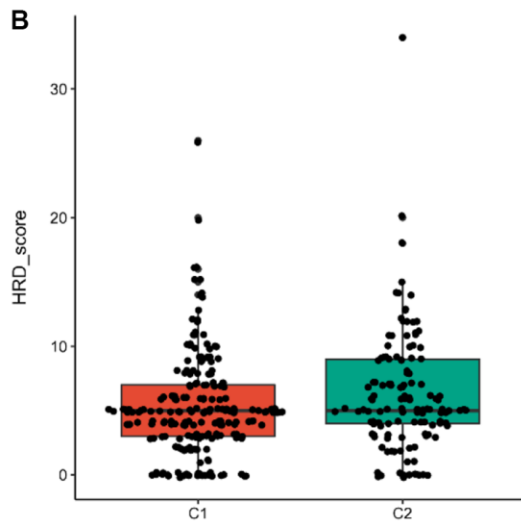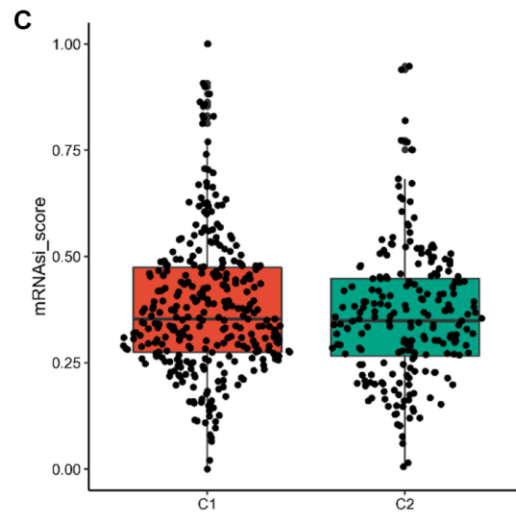

**Supplementary Figure 4. Molecular characteristics of immune subtypes.** (A) Overview of CNV in C1/C2 ccRCC patients. (B, C) HRD score and mRNAsi score of C1/C2 ccRCC patients. \**p*adj < 0.05; \*\**p*adj < 0.01; \*\*\**p*adj < 0.001.

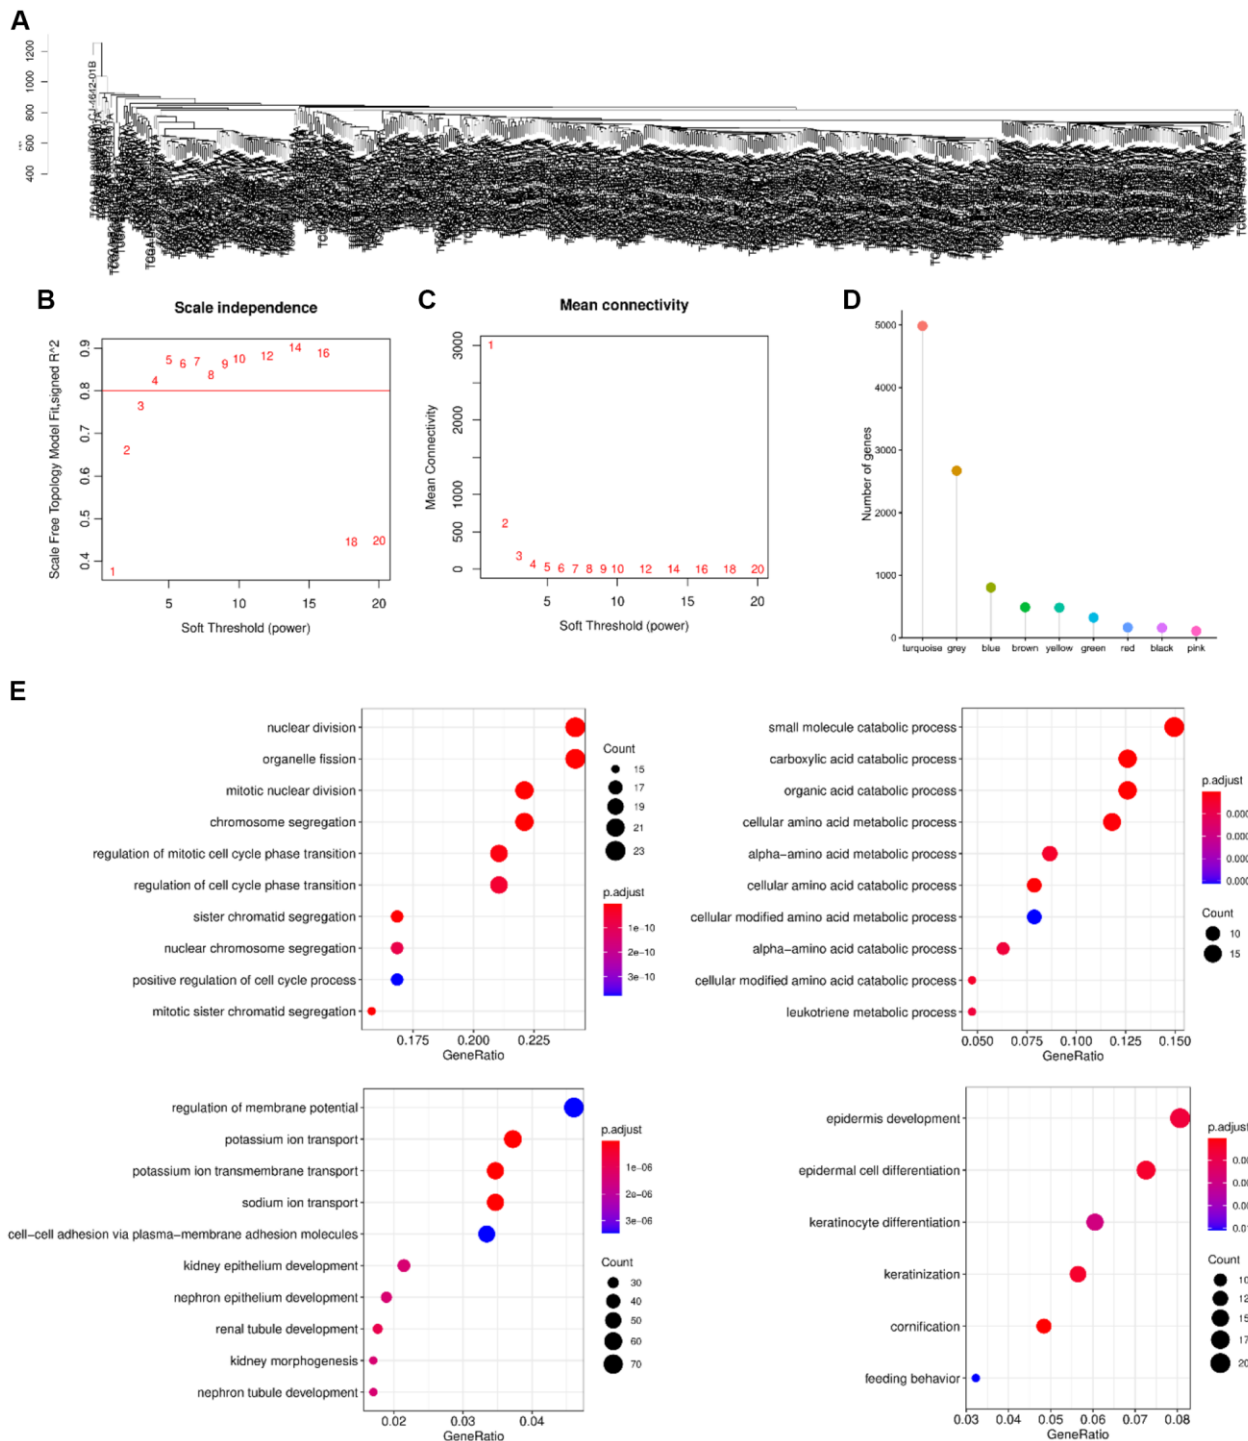

**Supplementary Figure 5. Immune gene co-expression modules and immune hub genes for ccRCC identification. (A)** Clustering of samples. **(B)** Scale-free fit index for various soft-thresholding powers ( $\beta$ ). **(C)** Mean connectivity for various soft-thresholding powers. **(D)** Gene numbers in each module. **(E)** BP, MF, CC, and KEGG enrichment of green, black, gray, and turquoise modules. The dot size and color intensity represent the gene count and enrichment level, respectively.
