# Supplementary material for: Identification of neoantigens and immunological subtypes in clear cell renal cell carcinoma for mRNA vaccine development and patient selection
Source: Aging (Albany NY). 2023 Jun 13;15(11):5190–214. doi: 10.18632/aging.204798 (PMC10292886; doi:10.18632/aging.204798)
Supplement: Supplementary Table 1 [file aging-15-204798-s002.xlsx]

## Sheet: Supplementary Table 2
Supplementary Table 1. The list of 157 differentially expressed PSI genes.
symbol	as_id	splice_type	exons	from_exon	to_exon	novel_splice	pct_with_values	psi_range	std_psi	FC	pval	padj	reg
HES4	4	AD	1.2:1.3	1.1	2	0	0.9884	0.7972	0.0828	1.09312	0.00042	0.000956514	UP
HES4	5	ES	1.3	1.1	2	0	0.9752	0.6754	0.0751	1.08147	0.0006	0.00133607	UP
HES4	6	RI	1.2	1.1	1.3	0	0.9868	0.8452	0.1528	1.081	0.08042	0.122286	NOT
C1orf159	10	AT	10.2	NA	NA	0	0.9983	0.4569	0.0515	0.86749	0.29077	0.374202	NOT
C1orf159	11	AT	12	NA	NA	0	0.9983	0.4569	0.0515	1.00784	0.29077	0.374202	NOT
C1orf159	12	RI	11.2	11.1	11.3	0	0.8909	0.9211	0.1978	1.38952	0	0	UP
C1orf159	13	AD	11.2:11.3	11.1	12	0	0.9587	1	0.2165	1.83277	0	0	UP
C1orf159	14	ES	11.3	11.1	12	0	0.8793	1	0.1839	1.11588	0.05409	0.0857895	NOT
C1orf159	20	AA	5.1:5.2:5.3:5.4	4.4	5.5	0	0.924	0.8196	0.157	2.77155	0	0	UP
C1orf159	21	AA	5.3:5.4	4.4	5.5	0	0.7669	0.4832	0.0782	1.93577	0.00078	0.00171089	UP
C1orf159	22	ES	5.1:5.2:5.3	4.4	5.5	0	0.7851	0.6624	0.0647	1.88342	0.0004	0.000913807	UP
TNFRSF18	36	ES	4.1:4.2:5.1	3	5.2	0	0.8413	0.2793	0.0311	1.00377	0.75714	0.811228	NOT
SDF4	38	AT	8.2	NA	NA	0	1	0.0524	0.0054	0.99792	0	0	DOWN
UBE2J2	47	ES	6.1:6.2	5	7	0	0.9983	1	0.0569	2.88645	0	0	UP
UBE2J2	63	ES	2.1:2.2	1.1	5	0	0.8083	0.9116	0.2	1.06336	0.17394	0.241134	NOT
UBE2J2	65	ES	2.1	1.1	5	0	0.9967	0.0935	0.0174	1.00256	0.24709	0.325915	NOT
ACAP3	74	ES	21	20	22	0	0.995	0.2113	0.032	0.99943	0.90891	0.932471	NOT
CPSF3L	80	AA	11.1	10	11.2	0	0.995	0.4971	0.0728	2.03587	0	0	UP
CPSF3L	81	ES	00:10:11.100000	9	11.2	0	0.9306	0.5527	0.0791	1.00864	0.51823	0.600527	NOT
CPSF3L	82	ES	10	9	11.2	0	0.9967	0.0423	0.0067	0.99771	2e-05	5.27e-05	DOWN
CPSF3L	83	AA	7.1	6.2	7.2	0	0.9967	0.1406	0.0174	0.99768	0.26617	0.347268	NOT
CPSF3L	84	AA	6.1	5.2	6.2	0	1	0.2079	0.0236	1.00711	0.01561	0.0277704	UP
CPSF3L	85	ES	5.1:5.2:6.1:6.2:7.1:7.2:8	4	9	0	0.9372	0.5075	0.0363	1.00169	0.69926	0.762664	NOT
CPSF3L	86	ES	5.2:6.1:6.2:7.1:7.2:8	4	9	0	0.9967	0.0084	0.0008	1.00006	0.6263	0.698963	NOT
CPSF3L	88	ES	5.2:6.2:7.1:7.2:8	4	9	0	0.9405	0.2759	0.0182	0.99963	0.83292	0.872773	NOT
CPSF3L	91	ES	5.2:6.1:6.2:7.2:8	4	9	0	0.9736	0.2944	0.0169	1.00368	0.39436	0.480739	NOT
CPSF3L	94	ES	5.1:5.2:6.1:6.2	4	7.1	0	0.9174	0.4489	0.0397	1.01312	0.1502	0.212626	NOT
CPSF3L	95	ES	5.2:6.1:6.2	4	7.1	0	0.9967	0.008	0.0011	1.00025	0.13599	0.194843	NOT
CPSF3L	97	ES	5.2:6.2	4	7.1	0	0.9306	0.2929	0.0281	1.00861	0.13474	0.193222	NOT
CPSF3L	98	AA	5.1	4	5.2	0	0.9934	0.6773	0.0849	3.55343	0	0	UP
CPSF3L	105	ES	4:5.2:6.1:6.2	2.1	7.1	0	0.757	0.3556	0.0374	1.00181	0.8199	0.862663	NOT
CPSF3L	121	ES	2.1:2.2:3:4:5.2:6.1:6.2	1	7.1	0	0.7504	0.9983	0.1673	1.03314	0.30017	0.384511	NOT
CPSF3L	123	ES	2.1:4:5.2:6.1:6.2	1	7.1	0	0.7818	0.9854	0.0806	1.00875	0.43175	0.517504	NOT
CPSF3L	124	ES	4:5.2:6.1:6.2	1	7.1	0	0.9967	0.0943	0.0053	0.99958	0.30739	0.392361	NOT
CPSF3L	132	ES	4:5.2:6.2	1	7.1	0	0.9388	0.7986	0.0667	0.99624	0.60294	0.678344	NOT
CPSF3L	138	ES	2.1:2.2:3	1	4	0	0.9851	0.5974	0.0577	3.28141	0	0	UP
CPSF3L	140	ES	2.1	1	4	0	0.9884	0.5189	0.0666	1.8356	0	0	UP
DVL1	141	AD	11.2	11.1	12	0	0.9934	0.9008	0.1248	0.7891	0	0	DOWN
MXRA8	142	AP	1	NA	NA	0	0.9653	0.6481	0.0803	0.88703	0.40695	0.492599	NOT
MXRA8	143	AP	2	NA	NA	0	0.9653	0.6481	0.0803	1.00601	0.40709	0.492736	NOT
MXRA8	144	AA	11.1	10.2	11.2	0	0.9967	0.1181	0.0165	1.00044	0.83547	0.874562	NOT
MXRA8	146	ES	4	3	5	0	0.9752	0.5887	0.0437	1.00734	0.29908	0.383286	NOT
AURKAIP1	147	RI	1.4	1.3	1.5	0	0.9901	0.9608	0.1231	1.31752	0	0	UP
AURKAIP1	148	RI	1.3:1.4	1.2	1.5	0	0.9702	0.8314	0.1397	1.16957	0	0	UP
AURKAIP1	149	AD	1.3	1.2	1.5	0	0.9868	0.2444	0.0453	1.02234	0.00029	0.000674512	UP
AURKAIP1	150	RI	1.2:1.3:1.4	1.1	1.5	0	0.9917	0.4959	0.0418	1.4169	0	0	UP
AURKAIP1	151	AD	1.2:1.3	1.1	1.5	0	0.9884	0.5106	0.0543	0.99042	0.74526	0.800911	NOT
CCNL2	155	AT	12	NA	NA	0	1	0.7704	0.0999	1.21509	0	0	UP
CCNL2	157	AT	6.3	NA	NA	0	1	0.7704	0.0999	0.72699	0	0	DOWN
CCNL2	158	AA	7.1	6.1	7.2	0	0.8926	0.4929	0.0419	1.00559	0.5997	0.675472	NOT
CCNL2	160	ES	6.1:7.1	5	7.2	0	0.9868	1	0.267	1.41532	0	0	UP
CCNL2	161	ES	6.1:6.2	5	7.2	0	0.9091	0.568	0.1097	1.38051	0.03814	0.0625389	UP
MRPL20	165	AT	4	NA	NA	0	1	0.511	0.0352	0.9735	0	0	DOWN
VWA1	171	AA	2.1	1	2.2	0	0.9967	0.0444	0.0065	0.9998	0.81963	0.862451	NOT
ATAD3B	173	AT	17	NA	NA	0	0.9983	0.6999	0.0462	0.98719	0.0002	0.000475301	DOWN
ATAD3A	174	AP	1	NA	NA	0	0.9785	0.8177	0.1815	0.8624	0	0	DOWN
ATAD3A	175	AP	2	NA	NA	0	0.9785	0.8177	0.1815	3.76306	0	0	UP
ATAD3A	176	AA	4.1	3	4.2	0	0.9851	0.9043	0.2002	1.97082	0	0	UP
SSU72	179	AT	2.2	NA	NA	0	1	0.4343	0.0567	1.18393	0	0	UP
SSU72	180	AT	5	NA	NA	0	1	0.4343	0.0567	0.97463	0	0	DOWN
MIB2	181	AP	2	NA	NA	0	0.9818	0.7335	0.0966	1.02861	0.48612	0.570412	NOT
MIB2	182	AP	4	NA	NA	0	0.9818	0.839	0.092	1.8843	0	0	UP
MIB2	183	AP	1	NA	NA	0	0.9818	0.9088	0.1127	0.89222	0	0	DOWN
MIB2	188	RI	19.2	19.1	19.3	0	0.9058	0.0293	0.0014	0.99991	0.17714	0.244925	NOT
MIB2	189	ES	19.1:19.2:19.3	18	20	0	0.9752	0.1084	0.0138	0.99699	0.00388	0.00768818	DOWN
MIB2	191	RI	12.2	12.1	12.3	0	0.9835	0.6244	0.0808	5.98677	0	0	UP
MIB2	192	ES	11	10.2	12.1	0	0.9901	0.1355	0.0169	0.99769	0.30186	0.386332	NOT
MIB2	193	AA	10.1	9	10.2	0	0.9851	0.1983	0.0348	0.99541	0.32081	0.404474	NOT
MIB2	194	ES	10.1:10.2	9	11	0	0.9934	0.1715	0.0191	0.99723	0.18099	0.249519	NOT
MIB2	196	ES	8	7	9	0	0.995	0.0892	0.0136	1.00325	0.10119	0.149826	NOT
MIB2	197	AD	5.4	5.3	6	0	0.9603	0.448	0.0679	1.02223	0.02793	0.0471998	UP
MIB2	198	AD	5.3:5.4	5.2	6	0	0.9851	0.5113	0.0884	1.03905	0.00419	0.00825081	UP
MIB2	200	AA	5.1	3.2	5.2	0	0.919	0.9291	0.1326	1.08298	0.01736	0.0306111	UP
CDK11B	204	AP	1	NA	NA	0	0.995	0.2514	0.0299	0.99555	0.14416	0.205062	NOT
SLC35E2B	207	ES	2	1	3	0	0.9868	0.9779	0.1462	0.98751	0.7147	0.775384	NOT
CDK11A	213	AD	11.2	11.1	12.1	0	0.9967	0.4749	0.0876	0.92633	0	0	DOWN
CDK11A	214	AD	7.2	7.1	8	0	0.9636	0.6661	0.1193	1.10922	0.0068	0.0129073	UP
CDK11A	216	ES	6.2	5	7.1	0	0.995	0.2728	0.0331	0.97881	1e-05	2.7e-05	DOWN
CDK11A	218	AD	4.2	4.1	5	0	0.9868	0.5987	0.0897	0.97242	0.08302	0.125845	NOT
CDK11A	220	AD	2.3:2.4	2.2	3	0	0.9835	0.4646	0.0651	1.63285	0	0	UP
CDK11A	221	ES	2.4	2.2	3	0	0.9851	0.5974	0.09	1.18988	0.00028	0.000652879	UP
SLC35E2	222	AT	8	NA	NA	0	0.9983	0.8208	0.1581	1.08873	0.02383	0.040825	UP
SLC35E2	223	AT	7	NA	NA	0	0.9983	0.8208	0.1581	0.92802	0.02382	0.0408117	DOWN
SLC35E2	224	ES	2	1	3	0	0.7901	0.8926	0.2624	1.05165	0.36179	0.447563	NOT
NADK	225	AP	3	NA	NA	0	0.9917	0.8842	0.1744	0.6504	0	0	DOWN
NADK	226	AP	8	NA	NA	0	0.9917	0.7986	0.1307	0.60742	0	0	DOWN
NADK	228	AP	1	NA	NA	0	0.9917	0.8729	0.2159	3.85707	0	0	UP
NADK	229	ES	9.2:10.1	9.1	10.2	0	0.9917	0.4665	0.0587	3.60913	0	0	UP
GNB1	231	ES	2	1	3	1	0.9719	0.1519	0.0194	0.99679	0.16326	0.228362	NOT
PRKCZ	235	AP	8	NA	NA	0	0.8777	0.8635	0.0938	0.53021	0.00021	0.000497957	DOWN
PRKCZ	238	AP	11	NA	NA	0	0.8777	0.5874	0.0828	1.26357	0.08966	0.134714	NOT
PRKCZ	239	AP	5	NA	NA	0	0.8777	0.4794	0.0523	4.17941	0	0	UP
PRKCZ	240	AP	1	NA	NA	0	0.8777	0.9653	0.1442	0.98141	0.18575	0.25499	NOT
C1orf86	244	AP	1	NA	NA	0	0.9802	1	0.169	2.72784	0	0	UP
C1orf86	245	AP	3	NA	NA	0	0.9802	1	0.169	0.86273	0	0	DOWN
C1orf86	246	AT	7.2	NA	NA	0	1	0.9553	0.0793	1.05677	2e-05	5.27e-05	UP
C1orf86	247	AT	10	NA	NA	0	1	0.9553	0.0793	0.92333	2e-05	5.27e-05	DOWN
C1orf86	248	ES	6:7.1:8:9	5	10	0	0.8132	1	0.178	1.52425	0	0	UP
C1orf86	249	ES	7.1:8:9	5	10	0	0.8231	1	0.1895	1.44437	0	0	UP
C1orf86	250	ES	6	5	7.1	0	0.9967	0.7435	0.1182	1.02721	0.19879	0.270486	NOT
C1orf86	251	ES	4	3	5	0	0.9851	0.1154	0.0154	1.00357	0.05117	0.0817132	NOT
MORN1	252	AT	8	NA	NA	0	0.9884	0.6676	0.0802	1.04016	0.66424	0.733158	NOT
MORN1	253	AT	17	NA	NA	0	0.9884	1	0.1717	1.08414	0.01363	0.0245507	UP
MORN1	254	AT	13	NA	NA	0	0.9884	0.7219	0.1336	0.77477	0.00059	0.00131569	DOWN
MORN1	255	ES	2	1	3	0	0.9256	0.5601	0.0798	0.99071	0.31332	0.398785	NOT
RER1	256	AP	1	NA	NA	0	0.9967	0.7609	0.1027	0.91503	0	0	DOWN
RER1	257	AP	2.1	NA	NA	0	0.9967	0.7609	0.1027	3.47244	0	0	UP
RER1	261	ES	4	3	5	0	1	0.0304	0.0036	0.99798	0	0	DOWN
PEX10	265	AA	7.1	6	7.2	0	0.9917	0.0266	0.0014	0.99986	0.04112	0.0670047	DOWN
PEX10	266	AA	5.1	4.2	5.2	0	0.9934	0.5022	0.0388	1.33575	0	0	UP
PEX10	267	ES	4.2:5.1	4.1	5.2	0	0.7653	0.8558	0.1674	0.95316	0.17875	0.246777	NOT
PEX10	268	AD	4.2	4.1	5.2	0	0.9917	0.2584	0.0324	0.98467	0	0	DOWN
PEX10	269	ES	2	1	3	0	0.8446	1	0.1567	3.33508	0	0	UP
PLCH2	272	AT	23.2	NA	NA	0	0.9785	0.7126	0.132	0.85846	0	0	DOWN
PLCH2	273	AT	22.3	NA	NA	0	0.9785	0.7126	0.132	2.37214	0	0	UP
PLCH2	274	ES	22.2:23.1	22.1	23.2	0	0.7521	0.967	0.2886	1.81976	0	0	UP
PLCH2	275	ES	17	16	18	0	0.7884	0.6349	0.0826	0.9734	0.00624	0.0119225	DOWN
PANK4	282	ES	2.5:3.1	2.4	3.2	0	0.9934	0.2015	0.0107	0.99975	0.78195	0.831657	NOT
TNFRSF14	286	AP	2.1	NA	NA	0	0.9983	0.1534	0.0131	0.99379	2e-05	5.27e-05	DOWN
TNFRSF14	289	AA	7.1	6	7.2	0	0.9967	0.4387	0.0878	2.04277	0	0	UP
FAM213B	290	AA	6.1	5	6.2	0	0.9917	0.8291	0.0744	0.98183	0.13922	0.198906	NOT
FAM213B	291	ES	5:6.1:6.2	4.2	6.3	0	0.9901	0.032	0.0031	0.99993	0.8211	0.863609	NOT
FAM213B	292	ES	00:05:06.200000	4.2	6.3	0	0.9901	0.0404	0.0037	1	0.99922	0.999461	NOT
FAM213B	293	AA	4.1	3	4.2	0	0.9917	0.3866	0.0337	1.21322	0.00359	0.00714652	UP
ARHGEF16	307	AP	1	NA	NA	0	0.8793	1	0.2056	0.48146	0	0	DOWN
ARHGEF16	308	AP	4.1	NA	NA	0	0.8793	0.7027	0.1514	1.45805	0.00012	0.00029253	UP
ARHGEF16	309	AP	3.1	NA	NA	0	0.8793	0.6355	0.1068	1.13308	0.25219	0.331471	NOT
ARHGEF16	310	AP	7	NA	NA	0	0.8793	0.876	0.1615	2.38464	0	0	UP
MEGF6	311	AP	1	NA	NA	0	0.7983	0.5067	0.0646	0.44987	0.0158	0.0280803	DOWN
MEGF6	312	AP	6	NA	NA	0	0.7983	0.5067	0.0646	1.03083	0.0158	0.0280803	UP
MEGF6	313	ES	39	38	40	0	0.9636	0.0191	0.0012	0.99988	0.04915	0.0787906	DOWN
MEGF6	314	ES	00:36:37.100000	35	37.2	0	0.9818	0.0669	0.0068	0.99987	0.90233	0.927222	NOT
MEGF6	315	ES	31	30	32	0	0.9372	0.794	0.1323	1.04917	0.02946	0.0495121	UP
MEGF6	317	ES	1 day, 2:27:00	25	28	0	0.9636	0.6416	0.0702	0.97846	6e-05	0.000151106	DOWN
TPRG1L	319	ES	3	2	4	0	0.9967	0.0547	0.0047	0.99984	0.67202	0.739822	NOT
WRAP73	320	RI	11.2	11.1	11.3	0	0.995	0.7233	0.1116	1.60616	0	0	UP
SMIM1	338	AT	4	NA	NA	0	0.9884	0.2477	0.0329	1.00951	0.0535	0.0849691	NOT
CEP104	339	AT	23	NA	NA	0	1	0.0847	0.0105	0.99673	0.00028	0.000652879	DOWN
AJAP1	352	AT	6	NA	NA	0	0.995	0.8827	0.1593	1.29051	0	0	UP
AJAP1	353	AT	7	NA	NA	0	0.995	0.8827	0.1593	0.8352	0	0	DOWN
NPHP4	355	ES	20	19	21	0	0.8083	1	0.0952	2.8801	0	0	UP
NPHP4	357	ES	00:13:14.100000	11	14.2	0	0.8182	0.3903	0.0546	0.98626	0.0075	0.0141298	DOWN
NPHP4	358	ES	12:13:00	11	14.2	0	0.8182	0.3517	0.0544	0.98537	0.00268	0.00543669	DOWN
NPHP4	359	ES	7	6	8	0	0.9091	0.399	0.055	0.99063	0.10921	0.160221	NOT
KCNAB2	360	AP	2	NA	NA	0	0.9653	1	0.1191	0.98103	0.90695	0.930941	NOT
KCNAB2	361	AP	3	NA	NA	0	0.9653	1	0.2547	4.50424	0	0	UP
KCNAB2	362	AP	7	NA	NA	0	0.9653	0.9888	0.2606	0.10882	0	0	DOWN
KCNAB2	367	RI	22.2	22.1	22.3	0	0.9653	1	0.1317	4.86978	0	0	UP
KCNAB2	370	ES	13:14:15:17:18:19:21:22.1:22.2:22.3	12	22.4	0	0.8298	0.8313	0.0683	0.98946	0.00133	0.00282122	DOWN
KCNAB2	372	ES	13:14:15:17:18:19:21:22.1:22.3	12	22.4	0	0.9967	0.0179	0.0021	0.99962	0.0001	0.000245651	DOWN
KCNAB2	374	ES	6	5	9	0	0.8331	0.9358	0.1222	0.98879	0.87344	0.904752	NOT
RPL22	379	AP	2	NA	NA	0	1	0.028	0.0022	0.99987	0.42689	0.512645	NOT
RPL22	381	AT	5	NA	NA	0	1	0.0063	0.0003	0.99996	0.0571	0.0899904	NOT
RNF207	382	ES	11:12:00	10	13	0	0.8893	0.2383	0.0199	0.99841	0.48366	0.568168	NOT
ICMT	385	ES	03:04:00	2	5	0	0.9736	0.7294	0.1175	0.89557	0	0	DOWN
ICMT	386	ES	4	2	5	0	0.995	0.2282	0.0337	0.98861	0.0001	0.000245651	DOWN
ICMT	387	ES	3	2	4	0	0.9785	0.5611	0.0709	0.77814	0	0	DOWN
ACOT7	388	AP	3	NA	NA	0	1	0.9794	0.2755	0.98501	0.82078	0.863366	NOT
ACOT7	389	AP	1.1	NA	NA	0	1	1	0.1187	0.79288	0.18205	0.25074	NOT
ACOT7	390	AP	4	NA	NA	0	1	0.814	0.116	1.36485	0.02091	0.0362296	UP
ACOT7	391	AP	2	NA	NA	0	1	0.9084	0.1502	0.95025	0.73602	0.793455	NOT
ACOT7	393	AT	14	NA	NA	0	1	0.3759	0.0365	0.99874	0.78783	0.836672	NOT
ACOT7	397	ES	1.2:5	1.1	6	0	0.9835	0.0276	0.0011	0.99995	0.31777	0.40167	NOT
HES2	400	AT	4.3	NA	NA	0	1	0.6175	0.1058	0.88795	0	0	DOWN
HES2	401	AT	5	NA	NA	0	1	0.6175	0.1058	1.19997	0	0	UP
TNFRSF25	409	RI	6.4	6.3	6.5	0	0.8909	0.1188	0.0089	0.99878	0.00466	0.00912008	DOWN
TNFRSF25	410	RI	6.3:6.4	6.2	6.5	0	0.9124	0.6361	0.1127	0.93815	0.00042	0.000956514	DOWN
TNFRSF25	412	ES	6.3:6.4:6.5:7.1	6.2	7.2	0	0.919	0.2104	0.0224	0.99335	0	0	DOWN
TNFRSF25	415	ES	6.1:6.2:6.3:6.4:6.5:7.1	5	7.2	0	0.8165	0.5677	0.0724	0.98945	0.39177	0.478049	NOT
TNFRSF25	416	ES	6.2:6.3:6.4:6.5:7.1	5	7.2	0	0.8182	0.4775	0.0702	0.99468	0.696	0.760051	NOT
TNFRSF25	425	AA	6.1:6.2:6.3:6.4	5	6.5	0	0.8198	0.9906	0.1532	0.91857	0	0	DOWN
TNFRSF25	426	AA	6.2:6.3:6.4	5	6.5	0	0.8083	1	0.1411	0.93175	0.0013	0.00276229	DOWN
TNFRSF25	443	ES	3:4:5:6.2:6.3:6.4:6.5:7.1	2	7.2	0	0.8926	0.1715	0.0165	0.99911	0.76337	0.816309	NOT
TNFRSF25	461	ES	3	2	4	0	0.8744	0.1413	0.0175	0.9948	0	0	DOWN
PLEKHG5	462	AP	1	NA	NA	0	0.8661	1	0.2219	0.74955	0.0043	0.00845138	DOWN
PLEKHG5	463	AP	3	NA	NA	0	0.8661	0.2384	0.0493	1.12277	0.69652	0.760341	NOT
PLEKHG5	464	AP	5	NA	NA	0	0.8661	0.4424	0.0499	1.7923	0.09531	0.142145	NOT
PLEKHG5	465	AP	8	NA	NA	0	0.8661	1	0.2194	1.30218	0.00013	0.00031598	UP
PLEKHG5	466	AP	4.1	NA	NA	0	0.8661	0.6681	0.1279	1.85061	3e-05	7.79e-05	UP
PLEKHG5	467	AP	6	NA	NA	0	0.8661	0.6575	0.0925	0.4588	0.00217	0.00446858	DOWN
PLEKHG5	468	AP	7	NA	NA	0	0.8661	0.2967	0.051	1.37098	0.19043	0.260528	NOT
PLEKHG5	469	AP	2	NA	NA	0	0.8661	0.7032	0.1059	0.68488	0.00336	0.00671766	DOWN
PLEKHG5	472	RI	27.2	27.1	27.3	0	0.9917	0.2905	0.0227	0.99849	0.61169	0.686514	NOT
PLEKHG5	473	AA	27.1:27.2:27.3	26	27.4	0	0.995	0.0942	0.0129	0.99726	0.10839	0.159175	NOT
KLHL21	478	AP	2	NA	NA	0	0.9868	0.1651	0.0134	0.99901	0.25407	0.333637	NOT
KLHL21	481	RI	4.2	4.1	4.3	0	1	0.5501	0.0963	1.16816	0	0	UP
KLHL21	482	RI	4.2:4.3	4.1	4.4	0	1	0.9615	0.1794	2.34701	0	0	UP
THAP3	486	AT	7	NA	NA	0	1	0.4872	0.072	1.04064	0.04038	0.0659139	UP
THAP3	487	AT	6	NA	NA	0	1	0.4872	0.072	0.97697	0.04039	0.0659245	DOWN
THAP3	489	AA	4.1	3	4.2	0	0.9917	0.4875	0.0572	0.98302	0.00839	0.0156542	DOWN
DNAJC11	492	AP	1	NA	NA	0	0.9901	0.2703	0.0341	1.06047	0	0	UP
DNAJC11	495	ES	12	11	13	0	1	0.2839	0.0146	0.99832	0.07677	0.117203	NOT
DNAJC11	496	ES	9.2:10:11:12:13:14:15:16:17.1	9.1	17.2	0	1	0.058	0.009	1.00155	0.08998	0.135135	NOT
DNAJC11	497	ES	9.2:10:11:13:14:15:16:17.1	9.1	17.2	0	0.7686	0.8169	0.2251	1.25216	0	0	UP
DNAJC11	498	ES	4	3	5	0	0.9967	0.1447	0.0127	0.99595	0	0	DOWN
CAMTA1	501	AT	26	NA	NA	0	1	0.2813	0.0293	1.21811	1e-05	2.7e-05	UP
CAMTA1	502	AT	5	NA	NA	0	1	0.3713	0.0577	0.95217	0	0	DOWN
CAMTA1	503	AT	6	NA	NA	0	1	0.3097	0.0508	1.12691	0	0	UP
CAMTA1	507	ES	3	1	4	1	0.9967	0.3131	0.0375	1.02558	0	0	UP
CAMTA1	508	ES	2	1	4	1	0.995	0.6053	0.0493	1.39566	0.00071	0.00156608	UP
VAMP3	509	AP	1	NA	NA	0	1	0.9054	0.1057	0.9363	0	0	DOWN
VAMP3	510	AP	2	NA	NA	0	1	0.9054	0.1057	1.55048	0	0	UP
PER3	514	AT	22	NA	NA	0	1	0.2205	0.0166	0.99249	0	0	DOWN
PER3	515	AA	19.1	18	19.2	0	0.8942	0.7144	0.1109	1.01875	0.47614	0.560957	NOT
PER3	516	AD	13.2	13.1	14	0	0.8678	0.6662	0.1166	1.08633	4e-05	0.000102527	UP
PER3	517	AA	6.1	5	6.2	0	0.8512	0.6325	0.0879	0.98067	0.06278	0.0979097	NOT
UTS2	520	AT	5.2	NA	NA	0	0.886	0.6961	0.1699	1.38383	0.0104	0.0191133	UP
UTS2	521	AT	7	NA	NA	0	0.886	0.6961	0.1699	0.90313	0.0104	0.0191133	DOWN
PARK7	523	AP	1.1	NA	NA	0	0.9983	0.0591	0.0052	0.99959	0.39468	0.481019	NOT
PARK7	526	ES	5	4	6	0	1	0.0082	0.0011	0.99963	0.00112	0.00240181	DOWN
PARK7	528	AD	1.2	1.1	3	0	0.9983	0.5947	0.0755	1.01224	0.39452	0.480868	NOT
ERRFI1	531	AT	3.4	NA	NA	0	1	0.0645	0.0095	1.00389	0.01227	0.0222782	UP
ERRFI1	533	RI	3.3	3.2	3.4	0	0.9917	0.9608	0.2092	1.96181	0	0	UP
ERRFI1	534	AA	3.1:3.2:3.3	2	3.4	0	0.9504	1	0.2724	1.53672	0	0	UP
ERRFI1	535	AA	3.2:3.3	2	3.4	0	0.9901	0.6872	0.1158	1.16013	0	0	UP
ERRFI1	536	ES	3.1:3.2	2	3.4	0	0.914	1	0.1392	1.08874	0.01307	0.0236172	UP
ERRFI1	537	ES	3.2	2	3.4	0	0.9802	0.2816	0.0395	1.02281	0.00793	0.0148649	UP
ERRFI1	538	AA	3.1	2	3.2	0	0.9702	0.5489	0.0821	1.28119	0	0	UP
RERE	541	AP	9	NA	NA	0	0.9818	0.9494	0.1065	1.21524	0	0	UP
RERE	543	AP	14	NA	NA	0	0.9818	0.7831	0.1174	0.98862	0.67487	0.742063	NOT
RERE	544	AP	1	NA	NA	0	0.9818	0.9799	0.0915	0.78207	0	0	DOWN
RERE	545	ES	18:19:20:21:22:23:24	17	25	0	1	0.0024	0.0001	1	0.31777	0.40167	NOT
CA6	548	AT	3	NA	NA	0	0.9653	0.7776	0.1404	0.9394	0	0	DOWN
CA6	549	AT	10	NA	NA	0	0.9653	0.5781	0.1077	4.23526	2e-05	5.27e-05	UP
CA6	550	AT	9	NA	NA	0	0.9653	0.4713	0.0642	Inf	0	0	UP
SLC2A5	552	AP	1	NA	NA	0	0.9421	0.6869	0.0489	0.97832	0	0	DOWN
SLC2A5	556	RI	6.2	6.1	6.3	0	0.9603	1	0.1476	2.14377	0.00067	0.00148214	UP
SLC2A5	557	ES	02:03:00	1	5	0	0.9719	0.1606	0.0097	1.00083	0.73559	0.793165	NOT
GPR157	558	ES	3	2	4	0	0.8694	0.7278	0.1556	0.97512	0.23732	0.314929	NOT
H6PD	559	AP	1	NA	NA	0	0.876	1	0.2197	0.66358	0	0	DOWN
H6PD	560	AP	2	NA	NA	0	0.876	1	0.2197	1.49158	0	0	UP
SPSB1	561	AP	3.1	NA	NA	0	0.8364	0.4958	0.0662	13.2655	0	0	UP
SPSB1	562	AP	1	NA	NA	0	0.8364	1	0.1009	0.94485	0	0	DOWN
SPSB1	563	AP	2	NA	NA	0	0.8364	1	0.072	3.00045	2e-05	5.27e-05	UP
TMEM201	564	AT	11	NA	NA	0	1	0.8181	0.115	1.69259	0	0	UP
TMEM201	565	AT	6.2	NA	NA	0	1	0.8181	0.115	0.80446	0	0	DOWN
TMEM201	566	ES	8	7	9	0	0.7802	0.3727	0.0587	0.98701	0.02504	0.0427139	DOWN
PIK3CD	572	RI	17.2	17.1	17.3	0	0.914	0.7353	0.1299	4.2694	0	0	UP
PIK3CD	573	AA	14.1	13	14.2	0	0.7752	0.7054	0.0852	1.3285	0.0243	0.0415559	UP
PIK3CD	574	AA	8.1	7	8.2	0	0.9488	0.3049	0.0256	0.99793	0.45131	0.536919	NOT
CLSTN1	575	ES	11	10	12	0	0.9934	0.948	0.1846	2.07256	0	0	UP
CLSTN1	576	ES	3	2	4	0	0.9736	0.8785	0.1322	1.58406	0	0	UP
CTNNBIP1	577	AP	1	NA	NA	0	0.8992	0.8871	0.1824	0.99217	0.77929	0.829441	NOT
CTNNBIP1	578	AP	2	NA	NA	0	0.8992	0.8871	0.1375	2.97716	0	0	UP
CTNNBIP1	579	AP	6.1	NA	NA	0	0.8992	0.622	0.1372	0.84151	0.38201	0.468174	NOT
CTNNBIP1	580	AP	4	NA	NA	0	0.8992	0.5785	0.0822	0.13983	2e-05	5.27e-05	DOWN
CTNNBIP1	583	RI	8.2	8.1	8.3	0	0.995	0.2431	0.0449	1.00997	0.06873	0.10613	NOT
CTNNBIP1	584	ES	3	1	5	0	0.8628	1	0.1125	1.22419	0.00368	0.00731672	UP
LZIC	586	AP	1	NA	NA	0	0.9868	0.697	0.1079	1.05344	0.00682	0.01294	UP
LZIC	587	AP	2	NA	NA	0	0.9868	0.697	0.1079	0.95096	0.00682	0.01294	DOWN
LZIC	588	AD	3.2	3.1	4	0	0.9967	0.0355	0.0044	1.00017	0.74926	0.804469	NOT
NMNAT1	589	AT	5	NA	NA	0	1	0.5454	0.0984	1.43953	0	0	UP
NMNAT1	590	AT	6.3	NA	NA	0	1	0.5454	0.0984	0.81696	0	0	DOWN
NMNAT1	591	RI	6.2	6.1	6.3	0	1	0.5196	0.0709	0.89721	0	0	DOWN
RBP7	592	ES	2	1	3	0	1	0.9842	0.1524	1.86528	0	0	UP
UBE4B	594	AT	29	NA	NA	0	1	0.2754	0.0219	0.99432	0.00805	0.0150725	DOWN
UBE4B	596	ES	8	7	9	0	0.9091	1	0.09	2.36881	0	0	UP
KIF1B	601	AT	25	NA	NA	0	1	0.712	0.0933	1.79974	0	0	UP
KIF1B	602	AT	52.2	NA	NA	0	1	0.712	0.0933	0.86294	0	0	DOWN
KIF1B	604	AA	52.1	51	52.2	0	1	0.0744	0.0047	1.00023	0.59593	0.672157	NOT
KIF1B	606	ES	00:16:17.100000	15	17.2	0	0.8231	0.7764	0.0848	1.62933	0	0	UP
PGD	610	ES	4	3.2	5	0	0.9983	0.0544	0.0092	0.99845	0.04407	0.0713635	DOWN
APITD1	613	AT	6	NA	NA	0	1	0.4455	0.0296	0.94646	0.1433	0.203994	NOT
APITD1	614	AT	5	NA	NA	0	1	0.4455	0.0296	1.00375	0.1433	0.203994	NOT
DFFA	616	AT	5.3	NA	NA	0	1	0.5586	0.0723	0.81501	0	0	DOWN
DFFA	617	AT	6	NA	NA	0	1	0.5586	0.0723	1.10239	0	0	UP
DFFA	618	AD	5.2	5.1	6	0	0.9719	0.2786	0.0411	0.81316	0.192	0.262345	NOT
DFFA	619	ES	4	3	5.1	0	0.9983	0.0862	0.014	0.99553	0.00033	0.000762422	DOWN
PEX14	620	ES	3	2	4	0	0.995	0.0438	0.006	0.99949	0.37129	0.45706	NOT
CASZ1	621	AT	16.2	NA	NA	0	1	0.9231	0.156	1.92951	0	0	UP
CASZ1	622	AT	21	NA	NA	0	1	0.9231	0.156	0.67908	0	0	DOWN
TARDBP	629	RI	7.5	7.4	7.6	0	1	0.028	0.0053	0.99764	0	0	DOWN
TARDBP	630	RI	7.3	7.2	7.4	0	1	0.0278	0.0029	1.00065	0.08758	0.13196	NOT
TARDBP	631	RI	7.2:7.3	7.1	7.4	0	1	0.0393	0.0038	0.99963	0.35468	0.440078	NOT
TARDBP	633	ES	03:04:00	2	5	0	0.9967	0.23	0.0385	1.00653	0.26403	0.344838	NOT
TARDBP	634	ES	4	2	5	0	0.995	0.0937	0.0078	0.9971	0	0	DOWN
TARDBP	635	ES	3	2	4	0	1	0.994	0.1433	2.68323	0	0	UP
MASP2	636	AT	12	NA	NA	0	0.9785	0.8228	0.042	0.99433	0.00406	0.00801255	DOWN
SRM	640	AA	2.1	1	2.2	0	0.9934	0.1697	0.0283	1.22254	0.00071	0.00156608	UP
EXOSC10	643	ES	18	17	19	0	0.9967	0.0653	0.0061	1.00145	0.1219	0.176612	NOT
EXOSC10	644	RI	16.4	16.3	16.5	0	1	0.9736	0.1331	2.48992	0	0	UP
EXOSC10	645	RI	16.2	16.1	16.3	0	0.995	0.6784	0.1227	3.06584	0	0	UP
EXOSC10	647	ES	4	3	5	0	0.9983	0.975	0.1826	1.9333	0	0	UP
MTOR	648	AP	1	NA	NA	0	0.8017	1	0.2714	0.72033	0	0	DOWN
MTOR	649	AP	39.1	NA	NA	0	0.8017	1	0.2714	3.52712	0	0	UP
UBIAD1	650	AT	3	NA	NA	0	1	0.2183	0.0346	1.11145	0.04748	0.0763822	UP
UBIAD1	651	AT	2	NA	NA	0	1	0.2183	0.0346	0.99352	0.04753	0.0764495	DOWN
FBXO44	654	AP	1	NA	NA	0	0.9785	0.567	0.0848	0.42644	0	0	DOWN
FBXO44	655	AP	2	NA	NA	0	0.9785	0.567	0.0848	1.15655	0	0	UP
FBXO44	656	AD	5.2	5.1	6	0	0.9884	0.648	0.0594	0.97167	0	0	DOWN
FBXO44	657	ES	5.2:6	5.1	7	0	0.9967	0.7941	0.0873	0.95513	6e-05	0.000151106	DOWN
FBXO44	658	ES	6	5.1	7	0	0.9785	0.7954	0.1143	1.56733	0	0	UP
FBXO44	659	AA	3.1	2	3.2	0	0.9736	0.4694	0.0864	0.99963	0.97177	0.979029	NOT
FBXO44	660	ES	3.1:3.2	2	4	0	0.9917	0.9571	0.1387	0.93191	0.10126	0.149906	NOT
MAD2L2	665	ES	02:03:00	1	4	0	0.9884	0.9523	0.1895	1.43872	0	0	UP
AGTRAP	666	AD	6.2	6.1	7	0	0.9983	0.3805	0.036	1.00775	0.0768	0.117245	NOT
AGTRAP	667	ES	4.1:4.2:5	3	6.1	0	0.9802	0.5654	0.036	1.00495	0.54491	0.62545	NOT
AGTRAP	668	ES	4.2:5	3	6.1	0	0.9851	0.4884	0.0323	1.0027	0.64778	0.718429	NOT
AGTRAP	669	ES	5	3	6.1	0	0.995	0.1204	0.0052	0.99996	0.92686	0.94608	NOT
AGTRAP	670	AA	4.1	3	4.2	0	0.957	1	0.1723	1.22376	3e-05	7.79e-05	UP
AGTRAP	671	ES	4.1:4.2	3	5	0	0.9934	0.5898	0.0659	1.93013	0	0	UP
AGTRAP	672	ES	4.2	3	5	0	0.9934	0.3585	0.0531	1.22257	0.00044	0.000999443	UP
AGTRAP	675	ES	3:4.1:4.2	1	5	0	0.8645	0.7162	0.15	0.95397	0.05989	0.0938964	NOT
AGTRAP	677	ES	00:03:04.200000	1	5	0	0.962	0.4742	0.0741	0.96714	2e-05	5.27e-05	DOWN
AGTRAP	679	ES	3	1	5	0	0.995	0.0826	0.0089	0.99566	0	0	DOWN
MTHFR	682	AP	4.1	NA	NA	0	0.8661	0.8819	0.1612	1.39496	0	0	UP
MTHFR	683	AP	1	NA	NA	0	0.8661	0.8819	0.1608	0.57419	0	0	DOWN
CLCN6	686	AT	24	NA	NA	0	1	0.9186	0.1056	0.8863	0	0	DOWN
CLCN6	688	AT	6	NA	NA	0	1	0.9227	0.1021	1.5325	0	0	UP
CLCN6	689	ES	13	12	14	0	0.9669	0.7379	0.1393	0.92961	0	0	DOWN
CLCN6	690	ES	3	2	4	0	0.9322	0.1186	0.0065	0.99931	0.02719	0.0460638	DOWN
KIAA2013	694	AT	3	NA	NA	0	1	0.3245	0.0275	1.00194	0.39713	0.483437	NOT
PLOD1	695	ES	2	1	3	0	0.9934	0.3941	0.0421	0.9992	0.9867	0.989747	NOT
MFN2	696	ES	2	1	3	0	0.9967	0.4947	0.0349	1.00026	0.91478	0.936846	NOT
MIIP	697	ES	8	7	9	0	0.995	0.0375	0.0045	0.99983	0.76871	0.820633	NOT
TNFRSF1B	703	AT	11	NA	NA	0	1	0.0074	0.0005	0.99994	0.01135	0.0207368	DOWN
PRDM2	721	AT	11	NA	NA	0	1	0.7007	0.0909	0.85869	0	0	DOWN
PRDM2	722	AT	13	NA	NA	0	1	0.7007	0.0909	1.46557	0	0	UP
PRDM2	723	ES	10	9	12	0	0.9471	0.7586	0.1346	1.00084	0.96532	0.974422	NOT
PRDM2	724	ES	08:09:10	7	12	0	0.7901	1	0.3204	1.31828	0.00068	0.00150328	UP
PRDM2	725	ES	09:10:00	7	12	0	0.9438	0.8432	0.1625	1.2058	0	0	UP
PRDM2	728	ES	8	7	9	0	0.7917	0.521	0.0831	0.64017	0	0	DOWN
KAZN	729	AP	1.1	NA	NA	0	0.8975	0.9825	0.2356	1.57475	0	0	UP
KAZN	730	AP	3	NA	NA	0	0.8975	0.947	0.2101	1.19412	0.03755	0.0616716	UP
KAZN	731	AP	2	NA	NA	0	0.8975	1	0.1449	0.63241	0	0	DOWN
KAZN	732	AP	4	NA	NA	0	0.8975	1	0.1675	0.76581	0.00062	0.00137798	DOWN
KAZN	733	AT	11.2	NA	NA	0	1	0.8929	0.1175	0.85093	0	0	DOWN
KAZN	734	AT	18	NA	NA	0	1	0.8929	0.1175	2.44398	0	0	UP
TMEM51	736	AP	2	NA	NA	0	0.9901	0.9023	0.1511	1.33024	0	0	UP
TMEM51	737	AP	1	NA	NA	0	0.9901	0.9023	0.1511	0.82402	0	0	DOWN
TMEM51	738	AA	5.1	4	5.2	0	0.9983	0.1827	0.0213	0.99514	0.00609	0.0116562	DOWN
TMEM51	739	ES	3	2	4	0	0.9769	0.7176	0.1113	1.03997	0.05051	0.0807663	NOT
FHAD1	747	AT	15.2	NA	NA	0	0.9719	0.8507	0.2135	0.60472	0	0	DOWN
FHAD1	749	AT	36	NA	NA	0	0.9719	0.915	0.2143	1.35	0	0	UP
CASP9	758	AP	2	NA	NA	0	0.9884	0.9727	0.084	0.96326	0	0	DOWN
CASP9	759	AP	1	NA	NA	0	0.9884	0.9727	0.084	1.79358	0	0	UP
CASP9	761	ES	4:5:6:7	3.2	8	0	0.9967	0.2068	0.0322	0.98903	0.00012	0.00029253	DOWN
CASP9	762	AD	3.2	3.1	4	0	0.9934	0.0426	0.0044	0.99929	0.01089	0.019951	DOWN
DNAJC16	763	AT	13.3	NA	NA	0	1	0.389	0.0803	0.9773	0.76471	0.817463	NOT
DNAJC16	765	AT	15	NA	NA	0	1	0.4118	0.085	0.98954	0.50857	0.591498	NOT
PLEKHM2	767	ES	7	6	8	0	0.9967	0.638	0.0874	1.17563	0	0	UP
FBLIM1	768	AP	5.1	NA	NA	0	0.9289	0.8336	0.1152	0.99033	0.9479	0.962037	NOT
FBLIM1	769	AP	3	NA	NA	0	0.9289	0.9597	0.225	1.4295	0	0	UP
FBLIM1	771	AP	1	NA	NA	0	0.9289	0.9597	0.219	0.42091	0	0	DOWN
FBLIM1	772	AT	11	NA	NA	0	1	0.7335	0.1145	0.88353	0	0	DOWN
FBLIM1	773	AT	9.2	NA	NA	0	1	0.7335	0.1145	1.47249	0	0	UP
FBLIM1	774	ES	06:07:00	5.2	8	0	0.9934	0.1907	0.0262	0.99311	0.00642	0.0122339	DOWN
FBLIM1	775	AA	4.1	3	4.2	1	0.8843	0.7629	0.0953	1.03083	0.31156	0.396951	NOT
ZBTB17	778	AA	14.1	13	14.2	0	0.9917	0.4488	0.052	1.33554	4e-05	0.000102527	UP
ZBTB17	779	RI	9.2	9.1	9.3	0	0.9884	0.7556	0.1297	3.23507	0	0	UP
ZBTB17	780	AA	5.1	4	5.2	0	0.9736	0.377	0.0466	1.69351	0	0	UP
ZBTB17	782	ES	4	3	5.2	0	0.9901	0.4954	0.0354	0.98929	0.00102	0.00220101	DOWN
ZBTB17	784	ES	3	2	4	0	0.9917	0.1568	0.0227	0.99871	0.62397	0.696904	NOT
HSPB7	785	AP	1	NA	NA	0	0.9041	0.8859	0.1772	0.84937	0.0116	0.0211553	DOWN
HSPB7	786	AP	2.1	NA	NA	0	0.9041	0.8859	0.1772	1.05803	0.0116	0.0211553	UP
HSPB7	788	AT	5	NA	NA	0	0.9851	0.4596	0.0235	1.00117	0.45247	0.538036	NOT
SZRD1	802	RI	5.2	5.1	5.3	0	0.9983	0.0117	0.0009	0.99994	0.56068	0.64007	NOT
SZRD1	803	AA	4.1	3	4.2	0	0.9967	0.6205	0.0656	0.96012	5e-05	0.00012694	DOWN
SZRD1	806	ES	3	1	4.1	0	0.9983	1	0.0771	0.91388	0	0	DOWN
SZRD1	808	ES	00:03:04.100000	1	4.2	0	0.9967	0.8201	0.0878	0.87206	0	0	DOWN
SZRD1	809	AA	4.1	1	4.2	0	0.9934	0.5387	0.0614	0.94267	0	0	DOWN
SZRD1	811	ES	3	1	4.2	0	0.995	1	0.0839	0.89656	0.00038	0.000870139	DOWN
NECAP2	821	RI	9.3	9.2	9.4	0	1	0.1365	0.0084	1.00004	0.96278	0.972463	NOT
NECAP2	822	RI	9.2:9.3:9.4	9.1	9.5	0	1	0.0419	0.0062	0.99819	0.00663	0.0126026	DOWN
NECAP2	823	ES	9.2:9.4	9.1	9.5	0	0.9752	0.9045	0.1705	0.95999	0.2692	0.350671	NOT
NECAP2	824	ES	8	7	9.1	0	0.9983	0.1002	0.0132	1.00012	0.94553	0.960492	NOT
NECAP2	826	ES	4	3	5	0	1	0.022	0.0021	0.9999	0.59857	0.674585	NOT
NECAP2	827	ES	2	1.2	3	0	0.9967	0.0271	0.0033	0.9992	0.01831	0.0321104	DOWN
NECAP2	828	AD	1.2	1.1	2	0	0.9934	0.0676	0.0058	1.0003	0.67107	0.738929	NOT
NBPF1	830	AP	1	NA	NA	0	0.9455	0.8602	0.1439	0.79978	0	0	DOWN
NBPF1	831	AP	3	NA	NA	0	0.9455	0.8602	0.1439	1.48623	0	0	UP
NBPF1	835	ES	25	24	26	0	0.9917	0.3719	0.0573	0.95703	0	0	DOWN
NBPF1	836	ES	10:11:12:13:14:15	9	16	0	0.995	0.7667	0.0978	0.87779	0	0	DOWN
ATP13A2	840	ES	28	27	29	0	0.9983	0.1596	0.0231	0.98773	0	0	DOWN
ATP13A2	841	ES	22	21	23	0	0.995	0.1221	0.0155	1.01783	0	0	UP
ATP13A2	842	AD	5.2	5.1	6	0	0.9603	0.6759	0.0931	1.02485	0.16775	0.23368	NOT
PADI2	844	AT	16	NA	NA	0	1	0.2854	0.0206	0.99164	0	0	DOWN
PADI2	845	ES	8	7	9	0	0.8231	0.1456	0.0144	0.99765	0.00848	0.0158118	DOWN
PADI2	846	ES	05:06:00	4	7	0	0.8661	0.2333	0.0129	0.99906	0.18566	0.254894	NOT
PADI4	851	AT	17	NA	NA	0	0.9934	0.8721	0.1747	1.32758	0.00826	0.0154324	UP
PADI4	852	AT	4	NA	NA	0	0.9934	0.8721	0.1747	0.93364	0.00825	0.015416	DOWN
RCC2	853	AP	2.1	NA	NA	0	0.9157	0.7267	0.1307	3.45333	0	0	UP
RCC2	854	AP	1	NA	NA	0	0.9157	0.7267	0.1307	0.90101	0	0	DOWN
ARHGEF10L	855	AP	1	NA	NA	0	0.914	0.9258	0.1783	0.7606	0	0	DOWN
ARHGEF10L	857	AP	4.1	NA	NA	0	0.914	0.7054	0.1006	1.6526	0.00092	0.00199896	UP
ARHGEF10L	858	AP	10	NA	NA	0	0.914	0.9258	0.1633	2.82454	0	0	UP
ARHGEF10L	859	AT	22	NA	NA	0	1	0.1802	0.0329	1.34389	0	0	UP
ARHGEF10L	861	AT	32	NA	NA	0	1	0.1802	0.0332	0.98617	0	0	DOWN
ARHGEF10L	862	ES	18	17	19	0	0.9736	0.905	0.2076	0.48476	0	0	DOWN
ARHGEF10L	863	ES	14:15:00	13	16	0	0.995	0.0436	0.0029	0.99996	0.88244	0.911623	NOT
ALDH4A1	868	AP	1	NA	NA	0	0.9603	0.8667	0.0784	0.96842	0	0	DOWN
ALDH4A1	869	AP	2	NA	NA	0	0.9603	0.8667	0.0784	1.89015	0	0	UP
ALDH4A1	870	RI	16.2	16.1	16.3	0	1	0.0726	0.0055	1.00065	0.14399	0.204859	NOT
ALDH4A1	871	ES	13	12	14	0	0.9983	0.17	0.0219	1.00331	0.13029	0.187582	NOT
UBR4	872	AP	74.1	NA	NA	0	1	0.989	0.115	0.65073	0	0	DOWN
UBR4	875	AP	103.1	NA	NA	0	1	0.958	0.2338	3.69043	0	0	UP
UBR4	876	AP	86.1	NA	NA	0	1	0.706	0.1438	2.41294	0	0	UP
UBR4	877	AP	1	NA	NA	0	1	0.7633	0.1782	0.25731	0	0	DOWN
UBR4	878	AT	107	NA	NA	0	1	0.4629	0.0295	0.99925	0.71862	0.77862	NOT
UBR4	881	ES	94	93	95	0	0.9983	0.0834	0.0111	0.99784	0.0372	0.0611667	DOWN
UBR4	882	ES	90	89	91	0	0.9983	0.0207	0.0025	0.99976	0.28036	0.363018	NOT
UBR4	883	RI	78.4	78.3	78.5	0	0.9653	0.4756	0.0403	8.33573	0	0	UP
UBR4	885	ES	60	59	61	0	0.9785	0.4165	0.0511	0.98045	1e-05	2.7e-05	DOWN
UBR4	886	ES	54	53	55	0	0.9388	0.3433	0.0546	1.05966	0.19942	0.271224	NOT
EMC1	891	AA	10.1	9	10.2	0	0.957	0.5731	0.067	0.98776	0.09366	0.139992	NOT
EMC1	893	ES	3	2.1	4	0	0.9818	0.1679	0.011	0.99666	0	0	DOWN
AKR7L	895	ES	04:05:00	3	6	0	0.9355	0.5115	0.0593	1.00521	0.54432	0.624888	NOT
PQLC2	898	AA	4.1	3	4.2	0	0.9917	0.5721	0.0722	1.00751	0.49778	0.581537	NOT
PQLC2	899	ES	2	1.3	3	0	0.9967	0.1803	0.0283	0.9863	0	0	DOWN
PQLC2	900	RI	1.2	1.1	1.3	0	0.9405	0.9784	0.1471	1.11071	0.04797	0.0770908	UP
CAPZB	901	AP	1	NA	NA	0	0.9983	0.2393	0.0151	0.99287	0	0	DOWN
CAPZB	907	ES	10:11:00	9	12	0	0.9785	0.657	0.0704	1.00171	0.87993	0.910002	NOT
CAPZB	908	ES	10	9	12	0	1	0.0143	0.001	0.9998	0.07436	0.113953	NOT
NBL1	911	AP	1	NA	NA	0	0.9471	0.4687	0.0495	1.19337	0.38684	0.473155	NOT
NBL1	912	AP	2	NA	NA	0	0.9471	0.4687	0.0495	0.99557	0.38684	0.473155	NOT
TMCO4	913	AP	2	NA	NA	0	0.9736	0.8437	0.1137	1.00245	0.90429	0.928751	NOT
TMCO4	914	AP	1	NA	NA	0	0.9736	0.8437	0.1137	0.99732	0.90429	0.928751	NOT
TMCO4	915	RI	17.2	17.1	17.3	0	1	0.0326	0.0046	0.99884	0.00569	0.0109625	DOWN
TMCO4	916	ES	11	10	12	0	0.9934	0.2281	0.0374	1.02911	0	0	UP
TMCO4	917	ES	3	1	4	1	0.8595	0.8236	0.1386	0.99436	0.85859	0.893507	NOT
VWA5B1	923	AT	15	NA	NA	0	0.9983	0.901	0.1916	1.82931	0	0	UP
VWA5B1	924	AT	24	NA	NA	0	0.9983	0.7877	0.162	0.09698	0	0	DOWN
VWA5B1	925	AT	20	NA	NA	0	0.9983	0.2357	0.0468	0.26659	0	0	DOWN
DDOST	932	ES	2	1	3	0	0.9983	0.0152	0.0012	1.00011	0.31609	0.40167	NOT
HP1BP3	936	AP	1	NA	NA	0	1	0.8076	0.1968	0.53043	0	0	DOWN
HP1BP3	937	AP	7.1	NA	NA	0	1	0.9291	0.2217	2.14834	0	0	UP
HP1BP3	938	AP	2	NA	NA	0	1	0.3065	0.0481	0.59602	0	0	DOWN
HP1BP3	939	AT	6	NA	NA	0	1	0.3085	0.0371	3.17813	0	0	UP
HP1BP3	940	AT	15	NA	NA	0	1	0.3085	0.0371	0.96471	0	0	DOWN
EIF4G3	941	AP	1	NA	NA	0	0.8083	0.1769	0.008	0.99958	0.31789	0.40167	NOT
EIF4G3	948	AT	42	NA	NA	0	1	0.1763	0.0094	0.99997	0.97807	0.983678	NOT
EIF4G3	951	ES	23	22.1	24	0	0.9802	0.4799	0.068	0.93921	0.02044	0.0354761	DOWN
EIF4G3	952	ES	18.1	17	19	0	0.9736	0.4296	0.0616	2.5168	0	0	UP
EIF4G3	954	ES	17	16.2	19	0	0.9934	0.0951	0.0083	0.99974	0.72088	0.780661	NOT
EIF4G3	955	ES	16.1:16.2	15	17	0	0.9719	0.2474	0.0311	0.99186	0.00043	0.000978096	DOWN
EIF4G3	956	ES	16.2	15	17	0	0.9653	0.3584	0.0346	0.99375	0.03583	0.0591457	DOWN
EIF4G3	957	AA	16.1	15	16.2	0	0.9504	0.8503	0.1039	0.95596	0.03478	0.0575778	DOWN
EIF4G3	960	ES	10	9	12	0	0.9091	0.5955	0.0935	0.75174	0	0	DOWN
ECE1	961	AP	1	NA	NA	0	0.9884	0.8894	0.1246	0.75011	0	0	DOWN
ECE1	962	AP	3.1	NA	NA	0	0.9884	0.3794	0.0448	1.01953	0.61544	0.689583	NOT
ECE1	963	AP	2	NA	NA	0	0.9884	0.4679	0.0624	1.00223	0.94526	0.960347	NOT
ECE1	964	AP	4.1	NA	NA	0	0.9884	0.744	0.12	1.86442	0	0	UP
ECE1	965	ES	19	18	20	0	0.9983	0.0255	0.0036	0.9996	0.41668	0.502164	NOT
NBPF3	966	AD	12.3	12.2	13	0	0.9603	0.768	0.1199	0.91275	0	0	DOWN
NBPF3	967	AA	12.1	11	12.2	0	0.9769	0.717	0.1007	3.07622	0	0	UP
NBPF3	968	ES	3:4:5:6	2	7	0	0.9967	0.2865	0.0196	1.00111	0.57206	0.6502	NOT
NBPF3	970	ES	03:04:05	2	6	0	0.9901	0.2523	0.0283	0.99716	0.23359	0.310686	NOT
ALPL	972	AP	2	NA	NA	0	0.9058	1	0.268	0.67217	0.00015	0.000362025	DOWN
ALPL	974	AP	11	NA	NA	0	0.9058	0.4757	0.0528	1.93803	0.00025	0.00058681	UP
ALPL	975	AP	1	NA	NA	0	0.9058	1	0.2587	1.31874	0.00035	0.000805789	UP
ALPL	976	ES	10	9.2	12	0	0.9967	0.047	0.0027	1.00028	0.32493	0.408855	NOT
ALPL	977	ES	5	4	6	0	0.9752	0.2316	0.0136	0.99795	0.01132	0.0206861	DOWN
ALPL	978	ES	3	1	4	0	0.9587	0.4559	0.0455	1.01108	0.07281	0.111807	NOT
RAP1GAP	983	AA	26.1:26.2	25.2	26.3	0	0.8562	0.8454	0.1291	0.99459	0.72368	0.782944	NOT
RAP1GAP	984	AA	26.2	25.2	26.3	0	0.9636	0.3227	0.0477	0.99128	0.01248	0.0226287	DOWN
RAP1GAP	985	AA	26.1	25.2	26.2	0	0.9587	0.4279	0.0614	1.05774	0.02663	0.0452135	UP
RAP1GAP	986	AA	25.1	24	25.2	0	0.9785	0.0409	0.0018	0.99987	0.13196	0.189716	NOT
RAP1GAP	988	RI	22.2:22.3	22.1	22.4	0	0.8083	0.991	0.3021	3.86994	0	0	UP
RAP1GAP	990	AA	22.1:22.2:22.3	21	22.4	0	0.9669	0.6868	0.0834	2.21087	0	0	UP
RAP1GAP	992	ES	22.1	21	22.4	0	0.9438	0.3702	0.0745	0.34251	0	0	DOWN
USP48	994	AP	12.1	NA	NA	0	0.9967	0.9448	0.2307	2.2799	0	0	UP
USP48	995	AP	1	NA	NA	0	0.9967	0.9448	0.2307	0.60088	0	0	DOWN
USP48	996	AT	27	NA	NA	0	1	0.724	0.0824	1.13291	0	0	UP
USP48	997	AT	11.2	NA	NA	0	1	0.724	0.0824	0.79902	0	0	DOWN
USP48	998	ES	23	22	24	0	1	0.5097	0.0253	0.99425	0.00114	0.00244217	DOWN
USP48	1000	AA	14.1	13	14.2	0	0.9934	0.892	0.0727	0.95237	1e-05	2.7e-05	DOWN
USP48	1001	AA	10.1	9	10.2	0	0.9868	0.7396	0.0559	0.99425	0.32334	0.407128	NOT
LDLRAD2	1002	RI	5.2	5.1	5.3	0	0.9983	0.0137	0.0006	0.99997	0.27613	0.358236	NOT
CDC42	1004	AT	9	NA	NA	0	1	0.093	0.0059	0.99675	0	0	DOWN
CDC42	1006	ES	2	1	3	0	1	0.9422	0.0556	1.30677	0	0	UP
ZBTB40	1009	ES	05:06:00	4	7	0	0.9818	0.1569	0.0247	1.00419	0.18031	0.248719	NOT
C1QA	1011	AP	1	NA	NA	0	1	0.1583	0.0201	0.9884	3e-05	7.79e-05	DOWN
C1QC	1014	AD	1.3	1.2	2	0	0.919	0.7533	0.1031	1.14859	0.08704	0.131257	NOT
C1QC	1020	AD	1.2	1.1	2	0	0.9917	0.2254	0.0189	1.00963	0.82285	0.865036	NOT
EPHB2	1024	AT	17.5	NA	NA	0	0.9983	0.2042	0.0094	0.99991	0.8874	0.915785	NOT
EPHB2	1025	RI	17.4	17.3	17.5	0	0.7653	0.241	0.0279	1.00489	0.16276	0.227782	NOT
EPHB2	1026	RI	17.2	17.1	17.3	0	0.9934	0.9718	0.2619	2.26348	0	0	UP
KDM1A	1032	ES	3	2	4	0	0.9785	0.623	0.0828	0.94926	1e-05	2.7e-05	DOWN
LUZP1	1037	AT	6	NA	NA	0	1	0.1415	0.0075	0.99747	0	0	DOWN
LUZP1	1039	ES	3.2	2	4	0	0.8843	0.2352	0.02	0.99652	0.00927	0.0171828	DOWN
HNRNPR	1043	AA	8.1	7	8.2	0	0.995	0.4147	0.0473	0.88905	0	0	DOWN
HNRNPR	1044	ES	6	5	7	0	0.9983	0.0626	0.0095	0.9979	0.02084	0.0361234	DOWN
HNRNPR	1046	ES	5	4	6	0	1	0.1417	0.0171	0.9956	0.00212	0.00437188	DOWN
HNRNPR	1047	AA	2.1	1	2.2	0	0.919	0.7649	0.1014	0.95128	0.01129	0.0206333	DOWN
HNRNPR	1048	ES	2.1:2.2	1	3	0	0.9818	0.9113	0.0918	0.97508	0.29665	0.380589	NOT
HNRNPR	1049	ES	2.2	1	3	0	0.9802	0.828	0.0861	1.03172	0.11042	0.161838	NOT
ZNF436	1050	AP	1	NA	NA	0	0.9488	0.9449	0.1695	1.45239	0	0	UP
ZNF436	1051	AP	2.1	NA	NA	0	0.9488	0.9449	0.1695	0.70856	0	0	DOWN
C1orf213	1054	RI	1.5	1.4	1.6	0	0.9719	0.6822	0.1464	1.15429	0	0	UP
C1orf213	1055	RI	1.3	1.2	1.4	0	0.9983	0.9068	0.1311	1.15745	0	0	UP
C1orf213	1056	RI	1.2:1.3	1.1	1.4	0	0.9983	0.9153	0.1358	1.09992	3e-05	7.79e-05	UP
TCEA3	1058	AP	1	NA	NA	0	0.9983	0.5182	0.0525	0.97023	0	0	DOWN
TCEA3	1059	AP	2.1	NA	NA	0	0.9983	0.5182	0.0525	1.99435	0	0	UP
TCEA3	1061	AT	12	NA	NA	0	1	0.0863	0.0079	1.00359	0	0	UP
TCEA3	1063	ES	2.2	1	3	1	0.8975	0.2028	0.032	0.97218	0	0	DOWN
ASAP3	1066	AD	21.2	21.1	22	0	0.8198	0.471	0.0824	2.16358	0	0	UP
PITHD1	1068	AP	1	NA	NA	0	0.9967	0.4498	0.0483	0.97177	0	0	DOWN
PITHD1	1069	AP	4	NA	NA	0	0.9967	0.4498	0.0483	3.02334	0	0	UP
LYPLA2	1070	AP	1	NA	NA	0	0.995	0.6899	0.0801	0.95442	0	0	DOWN
LYPLA2	1071	AP	5.1	NA	NA	0	0.995	0.6899	0.0801	2.2804	0	0	UP
LYPLA2	1072	RI	8.5	8.4	8.6	0	0.995	0.5619	0.052	2.40801	0	0	UP
LYPLA2	1073	RI	8.2:8.3	8.1	8.4	0	0.9802	0.8221	0.1705	1.25204	0	0	UP
LYPLA2	1074	AA	8.3	8.1	8.4	0	1	0.0609	0.009	0.99743	0.0017	0.00355341	DOWN
LYPLA2	1075	RI	8.2	8.1	8.3	0	0.9967	0.4288	0.0499	2.78769	0	0	UP
LYPLA2	1076	ES	7	6	8.1	0	1	0.0134	0.0013	1.00006	0.63519	0.70711	NOT
GALE	1077	ES	3	2	4	1	0.962	0.3406	0.0465	0.95327	0	0	DOWN
HMGCL	1079	AP	3	NA	NA	0	0.9983	1	0.0429	0.99558	0.02815	0.0475286	DOWN
HMGCL	1080	ES	07:08:00	6	9	0	1	0.1002	0.0156	0.98882	0	0	DOWN
MYOM3	1086	AT	39	NA	NA	0	1	0.0814	0.0087	0.99536	0	0	DOWN
IFNLR1	1093	AT	5.2	NA	NA	0	1	0.4073	0.0515	1.97898	0	0	UP
IFNLR1	1094	AT	8.2	NA	NA	0	1	0.4073	0.0541	0.97487	0	0	DOWN
IFNLR1	1095	AA	8.1	7.1	8.2	0	0.7934	0.0325	0.0015	1.00046	0.32075	0.404426	NOT
IFNLR1	1096	ES	7.1	6	8.1	0	0.8463	0.5807	0.078	1.00678	0.44416	0.529796	NOT
STPG1	1103	AP	2	NA	NA	0	0.8727	0.3266	0.0485	0.99803	0.64474	0.715567	NOT
STPG1	1105	AP	1	NA	NA	0	0.8727	0.3266	0.0485	1.05689	0.64474	0.715567	NOT
STPG1	1106	ES	4	3.2	5	0	0.9669	0.7605	0.1604	0.99375	0.76142	0.814692	NOT
NIPAL3	1109	AT	14	NA	NA	0	1	0.6396	0.0929	2.66074	0	0	UP
NIPAL3	1111	AT	15	NA	NA	0	1	0.6537	0.0992	0.90658	0	0	DOWN
RCAN3	1116	ES	4.1:4.2	3	5	0	0.9554	0.264	0.0149	0.99939	0.50008	0.583695	NOT
RCAN3	1118	ES	3:4.1:4.2	2	5	0	0.9719	0.3063	0.0161	1.00124	0.4754	0.560315	NOT
RCAN3	1122	ES	3	2	4.1	0	0.9438	0.2923	0.0323	0.99721	0.29318	0.376745	NOT
SRRM1	1128	ES	16	15	17	0	0.9868	0.6325	0.1032	1.09022	1e-05	2.7e-05	UP
SRRM1	1129	AD	12.2	12.1	13	0	0.9901	0.4824	0.0585	1.01057	0.1579	0.222012	NOT
SRRM1	1130	ES	11	10.2	12.1	0	0.9752	0.3358	0.0449	2.16031	0	0	UP
SRRM1	1131	AA	10.1	9	10.2	0	0.9785	0.0143	0.0006	0.99997	0.31778	0.40167	NOT
SRRM1	1132	AA	8.1	7	8.2	0	0.9917	0.1673	0.0243	1.00375	0.13404	0.192329	NOT
SRRM1	1133	ES	04:05:00	3	6	0	0.9835	1	0.1605	4.35254	0	0	UP
CLIC4	1134	RI	6.2	6.1	6.3	0	1	0.0053	0.0007	1.00018	0.08438	0.127632	NOT
SYF2	1139	ES	3	2	4	0	1	0.0426	0.0055	1.00159	0.02857	0.0481746	UP
C1orf63	1140	AP	2	NA	NA	0	0.9983	0.5406	0.0851	0.97346	0.03142	0.0525274	DOWN
C1orf63	1141	AP	1	NA	NA	0	0.9983	0.5406	0.0851	1.10878	0.03141	0.0525154	UP
C1orf63	1145	ES	5.1:5.2:6.1	4.2	6.2	0	0.9934	1	0.2959	2.76477	0	0	UP
C1orf63	1146	AA	6.1	4.2	6.2	0	0.9884	1	0.275	2.13835	0	0	UP
C1orf63	1147	ES	5.1:5.2:5.3	4.2	6.2	0	0.995	0.9641	0.2379	2.23479	0	0	UP
RHCE	1185	ES	07:08:09	6	10	0	0.7835	0.6547	0.0904	0.98099	0.01841	0.0322646	DOWN
TMEM57	1189	ES	05:06:00	4	7	0	0.9967	0.0614	0.0078	0.99941	0.49892	0.582578	NOT
TMEM57	1190	ES	2:3:4:5:6	1	7	0	0.9967	0.0451	0.0044	0.99985	0.73736	0.794432	NOT
MAN1C1	1192	AP	4	NA	NA	0	1	0.8903	0.2352	3.04306	0	0	UP
MAN1C1	1193	AP	1	NA	NA	0	1	0.8903	0.2352	0.36697	0	0	DOWN
SEPN1	1195	ES	3	2	4	0	0.9868	0.8606	0.0865	0.94926	0.06622	0.102709	NOT
MTFR1L	1196	AP	4.1	NA	NA	0	1	0.9491	0.1351	1.87276	0	0	UP
MTFR1L	1197	AP	3.1	NA	NA	0	1	0.247	0.0451	1.06034	0.25192	0.331175	NOT
MTFR1L	1198	AP	1	NA	NA	0	1	0.8914	0.1609	0.88378	0	0	DOWN
MTFR1L	1199	AP	2.1	NA	NA	0	1	0.3052	0.0456	0.62041	0	0	DOWN
MTFR1L	1205	AA	10.1:10.2:10.3	9	10.4	0	0.9983	0.0269	0.0042	1.00197	2e-05	5.27e-05	UP
MTFR1L	1206	AA	10.2:10.3	9	10.4	0	0.843	0.6005	0.1083	1.01589	0.15817	0.22235	NOT
MTFR1L	1207	AA	10.3	9	10.4	0	0.9818	0.4686	0.0358	1.01419	8e-05	0.000198597	UP
MTFR1L	1208	AA	10.1	9	10.2	0	0.9983	0.1648	0.0191	1.01578	0	0	UP
MTFR1L	1209	AA	10.1:10.2	9	10.3	0	0.9983	0.2599	0.0336	0.99887	0.73761	0.794632	NOT
MTFR1L	1210	AA	10.2	9	10.3	0	0.9653	0.6583	0.1175	0.73258	0	0	DOWN
MTFR1L	1211	ME	5|6	4.2	7.2	0	0.9835	0.7415	0.1256	0.89726	0	0	DOWN
MTFR1L	1212	AA	7.1	4.2	7.2	0	0.995	0.6809	0.0981	4.65544	0	0	UP
MTFR1L	1213	ES	6	4.2	7.2	0	0.9934	0.7191	0.1001	2.6235	0	0	UP
MTFR1L	1214	ES	5	4.2	7.2	0	0.9967	0.6485	0.1012	1.56696	0	0	UP
MTFR1L	1216	AD	2.3	2.2	4.2	0	0.762	0.8207	0.2066	1.28673	0	0	UP
MTFR1L	1217	AD	2.2:2.3	2.1	4.2	0	0.7521	0.686	0.1582	1.07462	0.00556	0.010728	UP
AUNIP	1219	AT	3.2	NA	NA	0	0.9983	0.8714	0.0752	1.0823	0	0	UP
AUNIP	1220	AT	4	NA	NA	0	0.9983	0.8714	0.0752	0.90909	0	0	DOWN
STMN1	1223	AP	2	NA	NA	0	0.9967	0.1336	0.0086	0.99846	0.03184	0.0531725	DOWN
STMN1	1226	AT	8	NA	NA	0	1	0.0296	0.0028	1.00072	0.01671	0.0295472	UP
CEP85	1244	AA	14.1	13	14.2	0	0.7967	0.8288	0.1288	0.96681	0.40786	0.493428	NOT
CEP85	1245	ES	3	2	4	0	0.9157	0.1816	0.0098	1.00144	0.31111	0.396445	NOT
UBXN11	1249	AT	12.2	NA	NA	0	1	0.815	0.1871	1.71165	0	0	UP
UBXN11	1250	AT	17	NA	NA	0	1	0.815	0.1871	0.67446	0	0	DOWN
UBXN11	1251	ES	10	9	11	0	0.9934	0.2451	0.0347	0.97908	0	0	DOWN
UBXN11	1252	ES	7:8:9:10	6	11	0	0.9884	0.2981	0.0304	0.99178	0.0016	0.00335565	DOWN
UBXN11	1254	ES	6	5	7	0	0.9967	0.8759	0.1041	1.02853	0.24979	0.328942	NOT
UBXN11	1255	ES	3:4:5:6:7:8:9	2	10	0	0.9306	0.9639	0.2349	1.24399	7e-05	0.000174782	UP
UBXN11	1256	ES	4:5:6:7:8:9	2	10	0	0.9851	0.7318	0.1271	1.05589	0.00467	0.00913725	UP
UBXN11	1257	ES	5:6:7:8:9	2	10	0	0.9174	1	0.1917	0.97981	0.60544	0.680644	NOT
UBXN11	1258	ES	3:4:5:7:8:9	2	10	0	0.9488	0.9149	0.1972	1.14541	0.00067	0.00148214	UP
UBXN11	1259	ES	4:5:7:8:9	2	10	0	0.9868	0.6075	0.0807	1.03542	0.00343	0.00684809	UP
UBXN11	1260	ES	5:7:8:9	2	10	0	0.9306	1	0.1671	0.97734	0.40891	0.494487	NOT
UBXN11	1261	ES	03:04:00	2	5	0	0.9686	1	0.1934	1.32077	0	0	UP
UBXN11	1262	ES	4	2	5	0	0.9884	0.8339	0.0968	1.088	0	0	UP
UBXN11	1263	ES	3	2	4	0	0.9719	0.748	0.1069	1.09837	0.1018	0.150616	NOT
LIN28A	1271	RI	4.2	4.1	4.3	0	1	0.5351	0.0875	1.02874	0.03201	0.0534372	UP
DHDDS	1272	AT	6.2	NA	NA	0	1	0.2653	0.0259	0.86874	1e-05	2.7e-05	DOWN
DHDDS	1273	AT	10.2	NA	NA	0	1	0.7997	0.0696	0.95523	0	0	DOWN
DHDDS	1274	AT	7	NA	NA	0	1	0.7583	0.0615	1.85143	0	0	UP
DHDDS	1275	AA	10.1	9	10.2	0	0.9967	0.5804	0.0602	0.91158	0.00061	0.00135664	DOWN
DHDDS	1276	ES	6.1	5	8	0	0.9983	0.5132	0.0404	0.99027	0.01185	0.0215817	DOWN
DHDDS	1277	ES	5	4.2	6.1	0	0.995	0.0545	0.0044	0.99941	0.07593	0.116054	NOT
DHDDS	1278	AA	4.1	3	4.2	0	0.995	0.4068	0.0465	1.98691	0	0	UP
RPS6KA1	1279	AP	3	NA	NA	0	0.9785	0.3566	0.0493	0.70467	0.00562	0.0108332	DOWN
RPS6KA1	1280	AP	1	NA	NA	0	0.9785	1	0.2295	0.43393	0	0	DOWN
RPS6KA1	1281	AP	7	NA	NA	0	0.9785	0.8773	0.1745	4.85919	0	0	UP
RPS6KA1	1282	AP	5	NA	NA	0	0.9785	0.6975	0.1367	3.81755	0	0	UP
RPS6KA1	1286	AA	16.1	15	16.2	0	0.9884	0.1057	0.0101	0.99855	0.06497	0.100996	NOT
RPS6KA1	1289	ES	8	4	9	0	0.9835	0.08	0.0106	1.00397	0.00175	0.00365282	UP
RPS6KA1	1290	ES	08:09:00	4	10	0	0.9851	0.0539	0.0033	0.99956	0.011	0.0201289	DOWN
ARID1A	1293	AP	2.1	NA	NA	0	0.9388	0.8306	0.1277	4.27327	0	0	UP
ARID1A	1295	AP	1	NA	NA	0	0.9388	0.8306	0.1277	0.94328	0	0	DOWN
ARID1A	1296	AA	18.1	17	18.2	0	0.9983	0.0609	0.0042	0.99954	0.20397	0.276507	NOT
ARID1A	1297	ES	18.1:18.2	17	19	0	0.9983	0.0359	0.0024	0.99996	0.86477	0.898511	NOT
PIGV	1299	AP	1	NA	NA	0	0.9636	0.8196	0.1652	0.79811	0	0	DOWN
PIGV	1300	AP	2.1	NA	NA	0	0.9636	0.8196	0.1652	1.17114	0	0	UP
PIGV	1301	RI	4.2	4.1	4.3	0	1	0.1363	0.0138	0.9998	0.85353	0.889281	NOT
PIGV	1302	AD	2.3	2.2	3	0	0.9339	0.7691	0.188	1.19079	0	0	UP
PIGV	1303	AD	2.2:2.3	2.1	3	0	0.962	0.9739	0.1465	1.4718	0	0	UP
PIGV	1304	AD	2.2	2.1	3	0	0.8397	0.8552	0.1255	1.03085	0.58803	0.664631	NOT
ZDHHC18	1306	AP	1	NA	NA	0	0.9785	0.3826	0.0206	0.9974	0.00743	0.0140099	DOWN
GPN2	1307	AP	1.1	NA	NA	0	0.9934	0.4498	0.0574	0.98968	0.06673	0.103418	NOT
GPN2	1308	AP	3	NA	NA	0	0.9934	0.4498	0.0574	1.41452	0.06673	0.103418	NOT
GPN2	1311	RI	1.2	1.1	1.3	0	0.9934	0.0231	0.0009	0.99996	0.31777	0.40167	NOT
SLC9A1	1312	AT	12	NA	NA	0	1	0.8354	0.0681	0.94747	0	0	DOWN
SLC9A1	1313	AT	5.2	NA	NA	0	1	0.8354	0.0681	2.34832	0	0	UP
SLC9A1	1314	ES	2	1	3	0	0.9983	0.1414	0.0143	1.00209	0.0836	0.126632	NOT
WDTC1	1317	RI	16.2	16.1	16.3	0	1	0.0047	0.0005	1.00018	0.09565	0.142584	NOT
WDTC1	1318	AA	15.1	14	15.2	0	0.9983	0.1101	0.0175	1.00381	0.03307	0.0549832	UP
WDTC1	1319	AA	11.1	10	11.2	0	0.9901	0.1843	0.0267	0.99689	0.20607	0.279019	NOT
SYTL1	1320	AP	1	NA	NA	0	0.8711	1	0.1564	0.82391	0	0	DOWN
SYTL1	1321	AP	2.1	NA	NA	0	0.8711	1	0.1564	4.37344	0	0	UP
MAP3K6	1323	ES	3	2	4	0	0.9289	0.7007	0.1138	1.06401	0.00581	0.0111752	UP
FCN3	1325	ES	4	3	5	0	0.9554	0.4301	0.0519	1.03754	0.00093	0.00201869	UP
WASF2	1330	ES	8	7	9	0	1	0.0282	0.0022	0.99984	0.42337	0.50911	NOT
AHDC1	1331	ES	00:03:04.100000	2	4.2	0	0.881	1	0.2335	1.32921	0	0	UP
FGR	1332	AP	3	NA	NA	0	0.8876	0.7014	0.1194	1.63855	7e-05	0.000174782	UP
FGR	1333	AP	5.1	NA	NA	0	0.8876	0.491	0.0641	1.8691	0.0493	0.0790175	UP
FGR	1334	AP	1	NA	NA	0	0.8876	0.9742	0.1892	0.64939	0	0	DOWN
FGR	1335	AP	2	NA	NA	0	0.8876	0.7097	0.1481	2.87105	0	0	UP
FGR	1336	ES	7.2:8	7.1	9	0	0.9967	0.0951	0.0073	0.99949	0.5524	0.632511	NOT
IFI6	1337	AD	2.3	2.2	3	0	0.9818	0.4694	0.0705	1.18249	0.00253	0.00515676	UP
IFI6	1339	AD	2.2	2.1	3	0	0.9983	0.5583	0.0356	1.07248	0.00053	0.00118998	UP
FAM76A	1340	AT	10	NA	NA	0	1	0.3213	0.0613	0.95447	0	0	DOWN
FAM76A	1341	AT	9.2	NA	NA	0	1	0.3213	0.0613	1.90923	0	0	UP
FAM76A	1342	ES	7	6	8	0	0.9785	0.5337	0.0867	0.9605	0.00046	0.00104196	DOWN
FAM76A	1343	ES	5	4	6	0	0.9901	0.3475	0.0211	0.99683	0.04249	0.0690474	DOWN
FAM76A	1344	ES	3	2	4	0	0.9917	0.8868	0.1954	1.65264	0	0	UP
PPP1R8	1345	ES	4	3	5	0	1	0.0662	0.0074	0.99851	0.03687	0.0606908	DOWN
PPP1R8	1347	AD	1.2:1.3	1.1	2	0	0.9802	1	0.0707	1.79362	0	0	UP
PPP1R8	1348	AD	1.2	1.1	2	0	0.9686	0.3544	0.0483	0.87147	0.19299	0.263525	NOT
THEMIS2	1349	RI	4.2	4.1	4.3	0	0.995	0.1846	0.0168	0.99757	0.35216	0.437431	NOT
THEMIS2	1350	ES	4.1:4.2:4.3	3	5	0	0.9983	0.2581	0.0328	1.00172	0.77852	0.828787	NOT
THEMIS2	1352	ES	3:4.1:4.2:4.3	2	5	0	0.9983	0.4648	0.0669	1.04773	0.00056	0.00125245	UP
RPA2	1359	AD	1.2	1.1	1.4	0	0.9934	0.1546	0.0192	0.98993	0	0	DOWN
SMPDL3B	1360	AT	7.2	NA	NA	0	0.9917	0.5222	0.0902	1.06647	0.15384	0.21708	NOT
SMPDL3B	1361	AT	8	NA	NA	0	0.9917	0.5222	0.0902	0.98761	0.1539	0.217148	NOT
SMPDL3B	1362	ES	4	3.2	5	0	0.9421	0.2682	0.0116	0.99919	0.14428	0.20521	NOT
EYA3	1367	AT	19	NA	NA	0	1	0.144	0.018	0.98853	0	0	DOWN
EYA3	1368	AA	10.1	9	10.2	0	0.8413	0.1286	0.0107	0.99916	0.3856	0.471892	NOT
EYA3	1369	ES	7	6	8	0	0.9174	0.7601	0.1066	0.96431	0.12051	0.174843	NOT
EYA3	1370	ES	06:07:00	5	8	0	0.9157	0.1596	0.0105	0.9999	0.90233	0.927222	NOT
EYA3	1371	ES	6	5	8	0	0.9421	0.0647	0.0044	1.00006	0.88184	0.91123	NOT
EYA3	1372	ES	4	3	5	0	0.9306	0.2722	0.0427	0.98829	0.0002	0.000475301	DOWN
EYA3	1374	ES	3	2	4	0	0.8975	0.0215	0.0012	1.00026	0.3827	0.468896	NOT
ATPIF1	1379	AT	2.4	NA	NA	0	1	0.1417	0.0149	0.99174	0	0	DOWN
ATPIF1	1380	RI	2.2	2.1	2.3	0	1	0.3909	0.0731	0.96855	0	0	DOWN
ATPIF1	1381	RI	2.2:2.3	2.1	2.4	0	1	0.4888	0.0797	0.49777	0	0	DOWN
MED18	1383	RI	3.2	3.1	3.3	0	1	0.0604	0.0088	0.99942	0.57954	0.657003	NOT
PHACTR4	1384	AP	1	NA	NA	0	0.9636	0.9336	0.1506	1.11491	0.00033	0.000762422	UP
PHACTR4	1385	AP	3	NA	NA	0	0.9636	0.9336	0.1506	0.80323	0.00033	0.000762422	DOWN
RCC1	1386	AP	1	NA	NA	0	0.9983	0.6569	0.1084	0.99394	0.67669	0.74367	NOT
RCC1	1387	AP	5	NA	NA	0	0.9983	0.6569	0.1084	1.02413	0.67679	0.743715	NOT
RCC1	1388	ES	7	6	8	0	0.9669	0.9567	0.1122	1.0712	0.13576	0.194566	NOT
TAF12	1389	AD	1.2	1.1	2	0	0.995	0.4797	0.0385	1.12348	0.02842	0.0479433	UP
GMEB1	1390	AA	3.1	2.2	3.2	0	0.8182	1	0.1402	0.90677	0.03775	0.0619756	DOWN
YTHDF2	1394	ES	2	1.3	3	0	0.9967	0.0806	0.0081	1.0024	0.03986	0.0651476	UP
YTHDF2	1395	RI	1.2	1.1	1.3	0	0.9504	0.0802	0.008	0.99903	0.08395	0.12709	NOT
EPB41	1396	AP	2	NA	NA	0	0.8694	0.65	0.0712	3.84377	0	0	UP
EPB41	1397	AP	3	NA	NA	0	0.8694	0.6034	0.0769	1.32841	0.00334	0.00668125	UP
EPB41	1398	AP	1	NA	NA	0	0.8694	0.714	0.1012	0.94387	0	0	DOWN
EPB41	1400	AT	24	NA	NA	0	1	0.1603	0.0121	0.99928	0.56451	0.643439	NOT
EPB41	1401	ES	21	20	22	0	0.9967	0.3651	0.0201	0.99528	0.00527	0.010208	DOWN
EPB41	1403	ES	20	19.1	21	0	0.9967	0.354	0.0281	1.00832	0.01087	0.0199173	UP
EPB41	1410	ES	16:17:18	15	19.1	0	0.881	0.6711	0.1217	0.40857	0	0	DOWN
EPB41	1411	ES	16:18:00	15	19.1	0	0.8959	1	0.1585	0.39672	0	0	DOWN
EPB41	1412	ES	18	15	19.1	0	0.9273	1	0.1982	0.44509	0	0	DOWN
EPB41	1413	ES	16	15	19.1	1	0.8678	0.8921	0.1988	0.58226	0	0	DOWN
EPB41	1414	ES	7	6	8	0	0.9702	0.2111	0.026	0.99703	0.25031	0.329545	NOT
SRSF4	1422	ES	08:09:00	7	10	0	0.9983	0.0568	0.0026	0.9998	0.27263	0.354434	NOT
SRSF4	1424	ES	6	5	7	0	0.995	0.7183	0.1219	2.26609	0	0	UP
SRSF4	1425	ES	02:03:04	1	5	0	0.995	0.9882	0.1786	2.02004	0	0	UP
MECR	1426	AA	2.1	1	2.2	0	0.9934	0.75	0.1034	1.13536	0.00127	0.00270192	UP
PTPRU	1427	AA	31.1	30	31.2	0	0.9587	0.1175	0.0137	0.9979	0.22364	0.29922	NOT
PTPRU	1428	AD	23.2	23.1	24	0	0.924	0.7671	0.0994	1.03228	0.1248	0.180408	NOT
SDC3	1436	RI	2.2	2.1	2.3	0	0.9785	1	0.1007	2.81692	0	0	UP
PUM1	1443	AD	18.2	18.1	19	0	0.9868	0.6674	0.0667	1.00357	0.7776	0.828207	NOT
PUM1	1444	ES	15	14.2	16	1	0.8645	0.2485	0.0322	0.98615	0.00011	0.000268942	DOWN
PUM1	1445	AA	14.1	13	14.2	0	0.9769	0.4112	0.0552	0.95819	0	0	DOWN
PUM1	1446	ES	13	12	14.1	0	0.9851	0.0433	0.0052	0.99916	0.03948	0.0646	DOWN
PUM1	1447	AA	10.1	9	10.2	0	0.9074	0.8969	0.1065	0.92285	9e-05	0.000222284	DOWN
PUM1	1448	ES	06:07:08	5	9	0	0.9967	0.1492	0.0074	0.99923	0.04346	0.0704704	DOWN
PUM1	1449	ES	5:6:7:8	4	9	0	0.9967	0.5468	0.0301	0.99479	0.00295	0.00595242	DOWN
PUM1	1450	ES	07:08:00	4	9	0	0.8678	0.7967	0.1585	1.00252	0.90582	0.930006	NOT
PUM1	1452	ES	05:06:00	4	7	0	0.9934	0.3885	0.0387	0.98731	4e-05	0.000102527	DOWN
PUM1	1455	AD	2.2	2.1	4	0	0.9818	0.3848	0.017	0.99992	0.93264	0.9505	NOT
PUM1	1456	AD	1.2	1.1	2.1	0	0.9636	0.193	0.0235	1.00323	0.15946	0.223885	NOT
SNRNP40	1457	AP	7.1	NA	NA	0	0.9917	0.6123	0.0529	4.08417	0	0	UP
SNRNP40	1458	AP	1	NA	NA	0	0.9917	0.6123	0.0529	0.96804	0	0	DOWN
SNRNP40	1459	ES	10	9	11	0	1	0.978	0.0777	1.6784	0	0	UP
ZCCHC17	1461	ES	3	2	4	0	0.9917	0.469	0.0526	1.02781	0.50413	0.587156	NOT
ZCCHC17	1463	ES	02:03:00	1.1	4	0	0.9421	0.814	0.1445	0.95243	0.01292	0.0233676	DOWN
ZCCHC17	1464	ES	1.2:2	1.1	4	0	0.8744	0.8514	0.1727	0.97666	0.38114	0.467276	NOT
ZCCHC17	1465	ES	2	1.1	4	0	0.995	0.1623	0.0234	0.99249	0.00089	0.0019384	DOWN
ZCCHC17	1466	AD	1.2	1.1	2	0	0.9917	0.359	0.0441	1.20675	0.00011	0.000268942	UP
SERINC2	1469	AP	3	NA	NA	0	0.995	0.965	0.105	0.86073	0	0	DOWN
SERINC2	1471	AP	4	NA	NA	0	0.995	0.965	0.1042	4.13598	0	0	UP
TINAGL1	1474	AT	12	NA	NA	0	1	0.2825	0.015	0.99645	0.00021	0.000497957	DOWN
TINAGL1	1477	AA	5.1:5.2	3	5.3	0	0.9322	0.3552	0.0458	1.02216	0.00554	0.0106928	UP
TINAGL1	1478	ES	5.1	3	5.3	0	1	0.0226	0.0013	1.00009	0.37961	0.465645	NOT
TINAGL1	1479	ES	3	2	5.1	0	1	0.0331	0.0036	0.99934	0.04824	0.0774747	DOWN
PEF1	1488	AT	6	NA	NA	0	1	0.1755	0.0094	0.99454	0	0	DOWN
COL16A1	1491	AT	75	NA	NA	0	1	0.0649	0.0068	1.00071	0.31392	0.399454	NOT
PTP4A2	1518	ES	7	6	8	0	1	0.113	0.0075	0.99867	0.09342	0.139672	NOT
PTP4A2	1523	ES	06:07:00	3	8	0	1	0.0229	0.0038	0.99838	0.00012	0.00029253	DOWN
PTP4A2	1527	ES	6	3	8	0	0.9868	0.7012	0.1195	0.96371	0.03695	0.0608065	DOWN
PTP4A2	1530	ES	6	3	7	0	1	0.0136	0.0015	1.00023	0.18088	0.249386	NOT
PTP4A2	1537	ES	3	2	6	0	1	0.5586	0.0251	1.00189	0.32518	0.409086	NOT
KHDRBS1	1542	ES	3	2	4	0	1	0.0982	0.0144	1.00988	1e-05	2.7e-05	UP
TMEM39B	1543	AT	9.2	NA	NA	0	1	0.7117	0.0734	0.86778	0.00656	0.0124784	DOWN
TMEM39B	1545	AT	10	NA	NA	0	1	0.7117	0.0734	1.02992	0.00656	0.0124784	UP
TMEM39B	1546	ES	6	5	7.2	0	0.9967	0.2772	0.0408	0.99608	0.43102	0.516795	NOT
TMEM39B	1549	ES	05:06:00	3	7.2	0	0.9934	0.5302	0.0658	0.97061	3e-05	7.79e-05	DOWN
KPNA6	1553	AP	1	NA	NA	0	0.9074	0.6054	0.0417	0.99649	0.16521	0.230675	NOT
KPNA6	1556	AA	9.1	8	9.2	0	0.9289	0.0386	0.0037	1.00007	0.847	0.884204	NOT
KPNA6	1557	AD	5.2	5.1	6	0	0.8992	0.2301	0.0261	1.00287	0.28915	0.372464	NOT
TXLNA	1558	AP	1	NA	NA	0	0.9785	0.7444	0.1227	0.79828	0	0	DOWN
TXLNA	1559	AP	2.1	NA	NA	0	0.9785	0.7444	0.1227	1.53391	0	0	UP
CCDC28B	1560	AT	3	NA	NA	0	1	0.8527	0.0844	2.53456	0	0	UP
CCDC28B	1561	AT	6.3	NA	NA	0	1	0.8527	0.0844	0.93234	0	0	DOWN
CCDC28B	1562	RI	6.2	6.1	6.3	0	0.9901	1	0.1825	2.56302	0	0	UP
CCDC28B	1563	AA	5.1	4	5.2	0	0.9818	0.1589	0.0185	0.99399	0	0	DOWN
IQCC	1564	AD	1.2	1.1	2	0	0.8264	1	0.2394	1.82627	0	0	UP
TMEM234	1567	AT	5.9	NA	NA	0	1	0.4406	0.0797	1.36706	0	0	UP
TMEM234	1568	AT	7	NA	NA	0	1	0.4406	0.0797	0.93896	0	0	DOWN
TMEM234	1569	RI	6.2	6.1	6.3	0	0.9785	0.9252	0.1785	1.22149	1e-05	2.7e-05	UP
TMEM234	1570	RI	5.7	5.6	5.8	0	0.9983	0.5132	0.0904	0.94289	0	0	DOWN
TMEM234	1571	RI	5.5	5.4	5.6	0	0.9983	0.6589	0.0716	0.96509	6e-05	0.000151106	DOWN
TMEM234	1572	RI	5.2	5.1	5.3	0	0.7851	0.637	0.1113	0.98433	0.34409	0.428804	NOT
TMEM234	1573	RI	5.2:5.3	5.1	5.4	0	0.995	0.4941	0.0827	1.14511	0.01703	0.030076	UP
TMEM234	1575	ES	4	3	5.1	0	0.995	0.7786	0.1014	1.7165	0	0	UP
TMEM234	1576	ES	02:03:04	1	5.1	0	0.9752	0.442	0.0629	1.01667	0.14275	0.203304	NOT
TMEM234	1577	ES	02:03:00	1	5.1	0	0.9967	0.0711	0.01	1.00079	0.59712	0.673337	NOT
LCK	1579	AP	2	NA	NA	0	0.876	1	0.1884	0.01871	0	0	DOWN
LCK	1581	AP	1	NA	NA	0	0.876	1	0.1884	1.84205	0	0	UP
LCK	1582	AA	10.1	9	10.2	0	0.8678	0.6026	0.0858	2.58044	0	0	UP
LCK	1583	ES	8	7	9	0	0.9636	0.2497	0.035	0.99079	0.14362	0.204388	NOT
LCK	1584	RI	4.2	4.1	4.3	0	0.8579	1	0.1508	3.37316	0	0	UP
HDAC1	1585	AP	1	NA	NA	0	0.995	0.0284	0.0037	0.99957	0.17081	0.23735	NOT
BSDC1	1590	AT	11.3	NA	NA	0	1	0.0119	0.0006	0.99996	0.17124	0.237859	NOT
BSDC1	1591	RI	11.2	11.1	11.3	0	1	0.9924	0.1082	3.16373	0	0	UP
BSDC1	1593	ES	6.2:7:8.1	6.1	8.2	0	0.9983	0.041	0.0045	1.00032	0.48362	0.568139	NOT
BSDC1	1594	ES	4.1:4.2:4.3:5	3	6.1	0	0.9901	0.1139	0.0088	0.99927	0.24343	0.321928	NOT
BSDC1	1595	ES	4.2:4.3:5	3	6.1	0	0.9983	0.0135	0.0011	0.99989	0.11841	0.172077	NOT
BSDC1	1598	AA	4.1:4.2	3	4.3	0	0.9636	0.4026	0.0839	1.02727	0.01909	0.033325	UP
BSDC1	1599	AA	4.2	3	4.3	0	0.9934	0.1143	0.0161	1.0025	0.15369	0.216893	NOT
BSDC1	1600	ES	4.1:4.2:4.3	3	5	0	0.9835	0.2257	0.0331	0.99759	0.49746	0.581272	NOT
BSDC1	1601	ES	4.2:4.3	3	5	0	0.9983	0.0706	0.0054	0.99944	0.24423	0.322757	NOT
BSDC1	1603	AA	4.1	3	4.2	0	0.9901	0.4119	0.0488	1.11526	0.00034	0.000784217	UP
BSDC1	1605	ES	3:4.1:4.2:4.3	2	5	0	0.9851	0.1352	0.0123	1.00069	0.63945	0.710868	NOT
BSDC1	1606	ES	3:4.2:4.3	2	5	0	0.9983	0.0159	0.0015	1.00011	0.57525	0.653031	NOT
ZBTB8A	1609	AA	5.1	4	5.2	0	0.9322	0.6642	0.1375	1.03983	0.03952	0.0646626	UP
ZBTB8OS	1610	AT	8	NA	NA	0	1	0.3327	0.0683	0.61283	0	0	DOWN
ZBTB8OS	1611	AT	7	NA	NA	0	1	0.3327	0.0683	1.09202	0	0	UP
ZBTB8OS	1612	ES	5	4	6	0	1	0.4032	0.0527	0.98851	0.1139	0.166305	NOT
ZBTB8OS	1614	ES	02:03:04	1	6	1	0.886	0.668	0.0755	1.04281	0.00187	0.00388787	UP
RBBP4	1615	AP	1	NA	NA	0	0.9983	0.0431	0.0029	0.99949	0.00641	0.0122173	DOWN
RBBP4	1622	AA	14.1	13	14.2	0	0.9983	0.0076	0.0015	0.99994	0.75825	0.812125	NOT
RBBP4	1623	ES	5	4	6	0	0.9967	0.5593	0.0996	1.23599	0.00023	0.000542935	UP
RBBP4	1624	ES	04:05:00	3.2	6	0	0.8215	0.1668	0.0143	0.99734	0.00042	0.000956514	DOWN
RBBP4	1625	ES	4	3.2	6	0	0.9983	0.0245	0.0014	0.99981	0.003	0.00604873	DOWN
RBBP4	1626	ES	04:05:06	3.2	7	0	0.8413	1	0.175	1.05546	0.00778	0.0146087	UP
RBBP4	1627	ES	04:06:00	3.2	7	0	0.9983	0.0513	0.0062	1.00121	0.04335	0.0703043	UP
RBBP4	1629	AA	3.1	1	3.2	0	0.9934	0.1297	0.0142	0.99973	0.83311	0.872923	NOT
KIAA1522	1631	AP	2	NA	NA	0	0.9372	0.9036	0.2041	0.5077	0	0	DOWN
KIAA1522	1632	AP	1	NA	NA	0	0.9372	0.9036	0.203	1.97269	0	0	UP
KIAA1522	1634	ES	07:08:00	6	9	0	1	0.0779	0.0057	0.9988	2e-05	5.27e-05	DOWN
S100PBP	1635	AT	9	NA	NA	0	1	0.8299	0.1066	0.95866	0.01494	0.0266813	DOWN
S100PBP	1636	AT	7	NA	NA	0	1	0.8299	0.1066	1.05305	0.01494	0.0266813	UP
S100PBP	1637	AA	4.1	3	4.2	0	0.9818	0.707	0.0969	0.9755	0.16131	0.226117	NOT
S100PBP	1638	AD	1.2	1.1	2	0	0.8579	0.4773	0.0747	0.99981	0.98544	0.988854	NOT
FNDC5	1641	AT	6.2	NA	NA	0	0.9769	0.9028	0.1935	2.65027	0	0	UP
FNDC5	1642	AT	7	NA	NA	0	0.9769	0.9028	0.1935	0.84453	0	0	DOWN
TMEM54	1644	ES	00:03:04.100000	2	4.2	0	1	0.0354	0.0033	0.99975	0.50486	0.58786	NOT
RNF19B	1646	AA	9.1	8	9.2	0	0.9934	0.404	0.05	1.03019	0.18444	0.253434	NOT
RNF19B	1647	AA	3.1	2	3.2	0	0.9851	0.5438	0.0665	0.89198	9e-05	0.000222284	DOWN
AK2	1650	AT	8.2	NA	NA	0	1	0.5794	0.0791	0.93562	0	0	DOWN
AK2	1651	AT	10	NA	NA	0	1	0.573	0.0785	1.15616	0	0	UP
AK2	1652	ES	9	8.1	10	0	0.995	0.521	0.0731	0.70793	0	0	DOWN
AK2	1653	ES	5	4	7	0	1	0.193	0.0132	0.99865	0.31821	0.401942	NOT
AK2	1654	ES	02:03:00	1	4	0	0.9983	0.4331	0.0427	0.97477	0	0	DOWN
AK2	1655	ES	3	1	4	0	1	0.0326	0.0033	0.99907	0.0055	0.0106211	DOWN
AK2	1656	ES	2	1	3	0	1	0.2369	0.0321	0.71743	0	0	DOWN
ADC	1659	AT	13	NA	NA	0	1	0.3476	0.0634	0.98834	0.14676	0.208364	NOT
ADC	1660	AT	11	NA	NA	0	1	0.3476	0.0634	1.14045	0.14676	0.208364	NOT
ADC	1662	ES	06:07:08	5	9	0	0.9967	0.4981	0.0235	0.99848	0.3087	0.393817	NOT
TRIM62	1665	AP	1	NA	NA	0	0.9554	0.6269	0.0461	0.99143	0.01623	0.0287706	DOWN
PHC2	1670	AP	10	NA	NA	0	0.9884	0.3913	0.055	1.06461	0	0	UP
PHC2	1671	AP	1	NA	NA	0	0.9884	0.3913	0.055	0.52682	0	0	DOWN
PHC2	1675	AT	17	NA	NA	0	1	0.1935	0.0117	0.9917	0	0	DOWN
ZSCAN20	1678	AT	6.2	NA	NA	0	1	0.9148	0.1448	1.74686	0	0	UP
ZSCAN20	1679	AT	8	NA	NA	0	1	0.9148	0.1448	0.8056	0	0	DOWN
CSMD2	1687	AT	50	NA	NA	0	1	0.8444	0.1501	1.06425	0.02764	0.0467499	UP
CSMD2	1688	AT	51	NA	NA	0	1	0.6525	0.0602	0.84838	0.23834	0.316081	NOT
CSMD2	1689	AT	78	NA	NA	0	1	0.686	0.122	1.18557	0.00026	0.000608752	UP
CSMD2	1690	AT	17.2	NA	NA	0	1	0.4164	0.0627	0.30127	0	0	DOWN
SMIM12	1697	AP	1.1	NA	NA	0	0.995	0.5027	0.0383	0.9789	0	0	DOWN
SMIM12	1700	AT	4.2	NA	NA	0	1	0.3988	0.0288	0.9788	0	0	DOWN
SMIM12	1701	AD	1.3	1.2	4.1	0	0.9669	0.6768	0.1105	1.02443	0.11684	0.170126	NOT
SMIM12	1702	AD	1.2:1.3	1.1	4.1	0	0.995	0.3837	0.0403	1.17167	3e-05	7.79e-05	UP
ZMYM6	1708	AP	1	NA	NA	0	0.9157	0.8273	0.1301	0.93917	0.01215	0.0220808	DOWN
ZMYM6	1709	AP	2	NA	NA	0	0.9157	0.8273	0.1301	1.07249	0.01215	0.0220808	UP
ZMYM6	1710	AT	18	NA	NA	0	1	0.4195	0.0537	1.23058	0	0	UP
ZMYM6	1711	AT	6.2	NA	NA	0	1	0.3049	0.0479	0.50717	0	0	DOWN
ZMYM6	1712	AT	20	NA	NA	0	1	0.4445	0.0525	1.04084	0	0	UP
ZMYM4	1716	ES	10:11:00	9	12	0	0.9818	0.0221	0.0011	1.0001	0.56547	0.644262	NOT
KIAA0319L	1718	AP	2.1	NA	NA	0	0.9851	0.7261	0.0844	0.94162	0	0	DOWN
KIAA0319L	1719	AP	1	NA	NA	0	0.9851	0.7261	0.0669	1.28254	0	0	UP
KIAA0319L	1723	AA	10.1	9	10.2	0	0.9669	0.0866	0.0105	0.99745	9e-05	0.000222284	DOWN
KIAA0319L	1724	ES	7	6	8	0	0.9967	0.1866	0.0105	0.99841	0.01835	0.0321745	DOWN
KIAA0319L	1725	ES	4	3	5	0	0.9983	0.6815	0.0383	0.9995	0.84949	0.886159	NOT
NCDN	1727	AD	1.2:1.3	1.1	2	0	0.9752	0.153	0.0137	0.99983	0.88098	0.910729	NOT
NCDN	1728	ES	1.3	1.1	2	0	0.9041	0.1229	0.0131	1.00019	0.88777	0.916015	NOT
NCDN	1729	RI	1.2	1.1	1.3	0	0.9719	0.8878	0.1146	0.99364	0.72417	0.783315	NOT
CLSPN	1730	AT	25	NA	NA	0	1	0.6934	0.1585	1.63839	0	0	UP
CLSPN	1731	AT	26	NA	NA	0	1	0.6934	0.1585	0.85219	0	0	DOWN
AGO1	1735	AP	2	NA	NA	0	0.8215	0.6957	0.0536	0.99506	0.27263	0.354434	NOT
AGO3	1739	AT	7.2	NA	NA	0	1	0.7079	0.0883	1.90085	0	0	UP
AGO3	1740	AT	8	NA	NA	0	1	0.7813	0.0828	0.91561	0.08344	0.12642	NOT
AGO3	1741	AT	22	NA	NA	0	1	0.775	0.1051	0.94319	0.00044	0.000999443	DOWN
AGO3	1742	ES	6	5	9	0	0.9074	0.2373	0.0185	0.99925	0.65901	0.728612	NOT
AGO3	1743	ES	4	3	5	0	0.9339	0.3455	0.039	0.99397	0.05428	0.0860543	NOT
TRAPPC3	1753	AD	1.3	1.2	2	0	0.9818	0.2782	0.0386	1.00913	0.09848	0.146353	NOT
TRAPPC3	1754	AD	1.2:1.3	1.1	2	0	0.9967	0.4106	0.0495	1.36047	0	0	UP
MAP7D1	1756	AP	9	NA	NA	0	0.9818	0.7289	0.1313	2.5876	0	0	UP
MAP7D1	1757	AP	1	NA	NA	0	0.9818	0.7289	0.1313	0.9038	0	0	DOWN
MAP7D1	1758	AA	15.1	14	15.2	0	0.9983	0.2211	0.0296	0.94882	0.05872	0.0922556	NOT
MAP7D1	1759	AA	11.1	10	11.2	0	0.9884	0.413	0.0377	1.0099	0.03799	0.0623148	UP
MAP7D1	1760	RI	7.2	7.1	7.3	0	0.9752	0.9051	0.1416	1.04135	0.11367	0.166021	NOT
MAP7D1	1761	ES	6	5	7.1	0	0.9983	0.4103	0.0595	0.91045	0	0	DOWN
THRAP3	1762	ES	2	1	3	0	0.924	0.451	0.0465	0.78553	0.00546	0.0105493	DOWN
SH3D21	1763	AP	1	NA	NA	0	0.762	0.803	0.1198	0.18603	0	0	DOWN
SH3D21	1764	AP	4.1	NA	NA	0	0.762	0.803	0.1198	1.56143	0	0	UP
SH3D21	1765	AT	16.2	NA	NA	0	0.9917	1	0.1622	1.22769	0.00022	0.000520315	UP
SH3D21	1766	AT	19	NA	NA	0	0.9917	1	0.1622	0.88926	0.00022	0.000520315	DOWN
SH3D21	1767	ES	12:13:00	11	14	0	0.9835	0.427	0.0584	0.9693	1e-05	2.7e-05	DOWN
SH3D21	1768	ES	07:08:00	6	9	0	0.9769	0.3937	0.0664	0.96576	0.00026	0.000608752	DOWN
SH3D21	1769	ES	5	4.2	6	0	0.957	0.2096	0.0301	0.99016	0.00642	0.0122339	DOWN
STK40	1772	RI	11.2	11.1	11.3	0	0.995	0.4766	0.0502	4.36436	0	0	UP
STK40	1774	ES	2	1	3	0	0.9868	0.7938	0.1079	1.36233	0	0	UP
OSCP1	1775	AP	1	NA	NA	0	0.995	0.1394	0.0111	0.99689	0	0	DOWN
OSCP1	1777	AT	7	NA	NA	0	1	0.6676	0.1105	1.04478	0.3543	0.439665	NOT
OSCP1	1778	AT	13.2	NA	NA	0	1	0.6676	0.1105	0.986	0.3543	0.439665	NOT
OSCP1	1779	ES	11.2:12:13.1	11.1	13.2	0	0.9983	0.0453	0.003	0.99999	0.96109	0.971307	NOT
CSF3R	1786	RI	17.3	17.2	17.4	0	1	0.3168	0.0181	1.0016	0.74308	0.799097	NOT
CSF3R	1787	AA	17.1	16	17.2	0	0.8331	0.3472	0.0545	0.70494	0.14349	0.204241	NOT
CSF3R	1788	ES	15	14	16	0	0.9504	0.0577	0.0034	0.99946	0.00067	0.00148214	DOWN
GRIK3	1790	AT	16	NA	NA	0	0.9752	0.9638	0.0957	1.03107	0.22389	0.299469	NOT
GRIK3	1791	AT	15.2	NA	NA	0	0.9752	0.9638	0.0957	0.73591	0.22389	0.299469	NOT
MEAF6	1793	AP	1	NA	NA	0	0.9983	0.0779	0.0056	0.99792	0	0	DOWN
MEAF6	1795	AT	9.2	NA	NA	0	1	0.0661	0.0044	0.99969	0.46203	0.547406	NOT
MEAF6	1798	ES	6:7:8.1:9.1	5	9.2	0	0.8364	1	0.1341	2.01121	0.00548	0.0105835	UP
MEAF6	1799	ES	7:8.1:9.1	5	9.2	1	0.9686	0.403	0.0607	0.93526	0	0	DOWN
MEAF6	1800	ES	6:8.1:9.1	5	9.2	0	0.8281	1	0.1056	1.42928	0.15291	0.215939	NOT
MEAF6	1801	ES	8.1:9.1	5	9.2	0	1	0.1238	0.0167	0.99736	0.14845	0.210499	NOT
MEAF6	1804	ES	7	5	8.1	1	0.9868	0.3692	0.0567	0.71449	0	0	DOWN
DNALI1	1806	ES	3	2	4	0	0.9967	0.5775	0.0656	1.0168	0.13813	0.197545	NOT
C1orf109	1814	AP	3.1	NA	NA	0	0.9289	0.5235	0.0861	1.08771	0	0	UP
C1orf109	1815	AP	1	NA	NA	0	0.9289	0.5235	0.0861	0.70118	0	0	DOWN
C1orf109	1816	AA	6.1	5	6.2	0	0.9074	0.5393	0.0555	1.44862	5e-05	0.00012694	UP
C1orf109	1817	AD	4.3	4.2	5	0	0.9636	0.2846	0.03	1.00137	0.6831	0.748711	NOT
C1orf109	1819	ES	3.3:4.1	3.2	4.2	0	0.8149	0.7816	0.1598	1.09937	0.0013	0.00276229	UP
EPHA10	1826	AT	3.2	NA	NA	0	0.9967	0.482	0.0426	0.99251	0.06356	0.0990186	NOT
MANEAL	1833	AP	1	NA	NA	0	0.9223	0.5458	0.0437	0.99342	0.00627	0.0119768	DOWN
MANEAL	1835	AA	4.1	3	4.2	0	0.914	0.7697	0.1276	0.94069	2e-05	5.27e-05	DOWN
C1orf122	1841	RI	1.2:1.3	1.1	1.4	0	0.9223	0.5671	0.0615	2.5855	0	0	UP
C1orf122	1842	AD	1.2	1.1	1.4	0	0.924	0.3802	0.0602	1.09228	0.45745	0.542789	NOT
INPP5B	1848	AT	7.3	NA	NA	0	1	0.6803	0.0446	1.37282	0	0	UP
INPP5B	1849	AT	24	NA	NA	0	1	0.6803	0.0446	0.97051	0	0	DOWN
INPP5B	1850	AA	16.1	15	16.2	0	0.9289	0.8209	0.1361	1.66929	0	0	UP
INPP5B	1851	ES	13	12	14	0	0.9851	0.1321	0.0174	0.99879	0.50882	0.591653	NOT
INPP5B	1852	AD	7.2	7.1	8	0	0.8182	0.8061	0.0967	1.356	1e-05	2.7e-05	UP
SF3A3	1853	ES	03:04:00	2	5	0	0.9967	0.0829	0.0108	0.99578	1e-05	2.7e-05	DOWN
UTP11L	1854	ES	6	5	7	0	1	0.054	0.0052	1.00113	0.12594	0.18193	NOT
GJA9	1857	AT	2.3	NA	NA	0	0.838	1	0.1106	0.95122	0.69784	0.76156	NOT
GJA9	1858	AT	7	NA	NA	0	0.838	1	0.1106	1.00807	0.69776	0.761495	NOT
RHBDL2	1859	AP	1	NA	NA	0	0.995	0.9414	0.2216	0.89657	0.03032	0.0508432	DOWN
RHBDL2	1860	AP	3	NA	NA	0	0.995	0.9414	0.2208	1.11813	0.05084	0.0812522	NOT
RHBDL2	1862	AT	5.2	NA	NA	0	1	0.3695	0.0492	2.94169	0.0001	0.000245651	UP
RHBDL2	1863	AT	10	NA	NA	0	1	0.3695	0.0492	0.98127	0.0001	0.000245651	DOWN
AKIRIN1	1864	ES	3	2	4	0	0.9983	0.1246	0.0113	0.99914	0.30763	0.392613	NOT
AKIRIN1	1866	ES	2	1	3	0	0.9967	0.0418	0.0034	0.99962	0.09085	0.136315	NOT
NDUFS5	1869	AD	1.2	1.1	2	0	1	0.611	0.161	0.89847	0.01295	0.023415	DOWN
MACF1	1870	AP	43.1	NA	NA	0	0.8413	1	0.2595	1.66903	3e-05	7.79e-05	UP
MACF1	1871	AP	1	NA	NA	0	0.8413	0.3585	0.047	1.17794	0.73557	0.793165	NOT
MACF1	1872	AP	11	NA	NA	0	0.8413	1	0.1592	0.51184	0	0	DOWN
MACF1	1874	AP	5	NA	NA	0	0.8413	1	0.24	0.97554	0.70399	0.76657	NOT
MACF1	1877	AT	109	NA	NA	0	1	0.1285	0.0054	0.99969	0.30661	0.391512	NOT
MACF1	1881	ES	107	106	108	0	1	0.8661	0.1249	0.68942	0	0	DOWN
MACF1	1883	ES	103	102	104	0	0.9983	0.7783	0.1248	0.76389	0	0	DOWN
MACF1	1885	ES	77	76.1	79	0	0.9653	0.2916	0.0435	0.959	0	0	DOWN
MACF1	1886	ES	69	68	70	0	0.9917	0.055	0.0058	1.00178	0.04464	0.072202	UP
MACF1	1887	ES	59	58	60	0	0.9273	0.678	0.0841	0.94661	0	0	DOWN
MACF1	1888	ES	43.2:44:45:46:47	42	48	0	0.9521	1	0.2317	2.10332	0	0	UP
MACF1	1889	ES	29	28	30	0	0.9074	0.2117	0.018	0.99673	0.00391	0.0077427	DOWN
PABPC4	1893	ES	11	10.2	12	0	0.9967	0.2633	0.0338	1.00689	0.12949	0.186488	NOT
PABPC4	1894	ES	10.2:11	10.1	12	0	0.9983	0.1015	0.0148	1.00146	0.45419	0.539606	NOT
PABPC4	1895	ES	11	10.1	12	0	0.995	0.2089	0.0352	1.00154	0.76823	0.820264	NOT
PABPC4	1896	AD	10.2	10.1	12	0	0.9835	0.6868	0.0903	1.0013	0.93107	0.949392	NOT
PABPC4	1897	AD	10.2	10.1	11	0	0.9967	0.3175	0.0424	1.01661	0.03964	0.0648249	UP
HEYL	1898	AP	1	NA	NA	0	0.9719	0.8844	0.1	0.9784	0.17286	0.239833	NOT
HEYL	1899	AP	2	NA	NA	0	0.9719	0.8844	0.1	1.12933	0.17286	0.239833	NOT
PPIE	1901	AT	10	NA	NA	0	1	0.5759	0.0773	0.92649	0	0	DOWN
PPIE	1902	AT	12	NA	NA	0	1	0.5245	0.0745	1.33187	0	0	UP
PPIE	1903	ES	11	9.1	12	0	0.9983	0.7755	0.1056	1.06429	0.00096	0.00207922	UP
PPIE	1904	AD	7.2	7.1	8	0	1	0.9938	0.1136	3.17268	0	0	UP
PPIE	1905	ES	7.1:7.2	6	8	0	1	0.7519	0.1821	1.03299	0.28799	0.371136	NOT
PPIE	1906	ES	7.1	6	8	0	0.9983	0.0752	0.0082	0.99709	3e-05	7.79e-05	DOWN
PPIE	1909	ES	00:04:01.100000	2	6	0	0.9967	0.0157	0.0015	1.00044	0.08971	0.134783	NOT
PPIE	1910	AD	1.2	1.1	2	0	0.9967	0.4202	0.0585	0.9736	0.00032	0.00074028	DOWN
BMP8B	1911	AT	6.2	NA	NA	0	1	0.8326	0.1756	1.50067	0	0	UP
BMP8B	1912	AT	8	NA	NA	0	1	0.8326	0.1756	0.88904	0	0	DOWN
TRIT1	1913	AT	12	NA	NA	0	1	0.5583	0.0268	0.99074	0	0	DOWN
TRIT1	1916	ES	10	9	11	0	0.9934	0.0437	0.0032	0.99984	0.53245	0.613561	NOT
TRIT1	1918	ES	9	8	10	0	0.9934	0.0464	0.0063	0.99832	0.00268	0.00543669	DOWN
TRIT1	1920	ES	8	7.2	9	0	0.9967	0.8167	0.0361	0.99668	0.10719	0.15766	NOT
TRIT1	1921	AA	7.1	6.2	7.2	0	0.9504	0.1471	0.0218	1.00027	0.90517	0.929425	NOT
TRIT1	1922	AD	6.2	6.1	7.1	0	0.9669	0.6761	0.0953	0.93857	0	0	DOWN
TRIT1	1923	ES	4	3.1	6.1	0	0.9868	0.564	0.0691	0.95293	0	0	DOWN
TRIT1	1924	ES	2:3.1:4:6.1:6.2	1	7.1	0	0.9851	0.2816	0.0337	0.99608	0.31927	0.403077	NOT
TRIT1	1926	ES	2:3.1:6.1:6.2	1	7.1	0	0.8529	0.7406	0.1477	1.04735	0.12649	0.182611	NOT
TRIT1	1928	ES	2:3.1:4:6.1	1	7.1	0	0.9339	0.6886	0.1359	1.02021	0.36922	0.454991	NOT
TRIT1	1932	ES	2:3.1:4:6.1:6.2:7.1:7.2:8:9	1	10	0	0.9868	0.2397	0.0174	0.99687	0.01976	0.0343709	DOWN
TRIT1	1934	ES	2:3.1:6.1:6.2:7.1:7.2:8:9	1	10	0	0.9058	0.6192	0.0757	1.00403	0.73632	0.793632	NOT
TRIT1	1936	ES	2:3.1:4:6.1:7.1:7.2:8:9	1	10	0	0.9421	0.5692	0.0723	0.99677	0.77165	0.823019	NOT
TRIT1	1971	ES	00:02:03.100000	1	4	0	0.9752	0.3	0.031	0.9917	0.00161	0.00337587	DOWN
TRIT1	1972	ES	00:03:01.100000	1	6.1	0	0.9901	0.381	0.041	0.98583	0.00017	0.000407766	DOWN
TRIT1	1974	ES	00:02:03.100000	1	6.1	0	0.8116	0.6932	0.1617	1.02941	0.37691	0.462834	NOT
MYCL	1975	AT	2	NA	NA	0	0.9983	0.8566	0.0674	1.08102	0	0	UP
MYCL	1976	AT	1.4	NA	NA	0	0.9983	0.8566	0.0674	0.44236	0	0	DOWN
MFSD2A	1980	ES	00:02:03.200000	1	4	0	0.7537	0.1481	0.0091	0.99892	0.02889	0.0486592	DOWN
CAP1	1981	AA	3.1	2.2	3.2	0	0.9983	0.3405	0.0221	0.99826	0.37559	0.461456	NOT
CAP1	1982	AA	2.1	1.2	2.2	0	0.9967	0.6174	0.0462	0.93885	2e-05	5.27e-05	DOWN
CAP1	1983	AD	1.2	1.1	2.1	0	0.9868	0.5044	0.0628	1.04365	1e-05	2.7e-05	UP
CAP1	1984	ES	1.2:2.1	1.1	2.2	0	0.9917	0.5016	0.065	0.99527	0.70096	0.764005	NOT
CAP1	1985	AA	2.1	1.1	2.2	0	0.9884	0.593	0.0645	0.90469	0	0	DOWN
CAP1	1986	AD	1.2	1.1	2.2	0	0.995	0.5723	0.0462	1.0221	0.00037	0.000848801	UP
PPT1	1987	AP	1	NA	NA	0	0.9967	0.0416	0.0029	0.99948	0.01917	0.0334568	DOWN
PPT1	1991	RI	10.2	10.1	10.3	0	1	0.015	0.0007	1	0.95566	0.967809	NOT
PPT1	1992	ES	9	8	10.1	1	0.8364	0.1085	0.0107	0.99117	0	0	DOWN
PPT1	1995	ES	02:03:04	1	5.2	0	0.9983	0.0123	0.001	0.9999	0.36835	0.454129	NOT
SMAP2	1997	AP	1	NA	NA	0	0.9967	0.5029	0.0514	0.98041	2e-05	5.27e-05	DOWN
SMAP2	1998	AP	2	NA	NA	0	0.9967	0.3902	0.0471	1.35785	0.00024	0.000564899	UP
ZFP69	2001	AA	2.1	1	2.2	0	0.9802	0.585	0.0985	1.00892	0.49223	0.576279	NOT
EXO5	2003	RI	1.2	1.1	1.3	0	0.8992	0.7626	0.2066	1.09929	0.0198	0.0344341	UP
EXO5	2006	AD	1.2:1.3	1.1	1.5	0	0.9421	0.7089	0.1229	1.02506	0.18858	0.258362	NOT
ZNF684	2008	AT	5.2	NA	NA	0	1	0.9761	0.1243	2.14175	0	0	UP
ZNF684	2009	AT	6	NA	NA	0	1	0.9761	0.1243	0.82685	0	0	DOWN
NFYC	2013	AP	1	NA	NA	0	1	0.8706	0.1155	1.22445	0	0	UP
NFYC	2015	AP	4	NA	NA	0	1	0.6135	0.1108	0.46548	0	0	DOWN
NFYC	2017	AA	20.1:20.2	19	20.3	0	0.9983	0.3873	0.0403	1.01853	0.00017	0.000407766	UP
NFYC	2018	AA	20.2	19	20.3	0	0.9934	0.1411	0.0228	1.0027	0.31603	0.40167	NOT
NFYC	2019	AA	20.1	19	20.2	0	0.9983	0.8174	0.0777	1.14574	0	0	UP
NFYC	2020	ES	18	17	19	0	0.995	0.2269	0.0324	1.76835	0	0	UP
NFYC	2021	AA	16.1	15	16.2	0	0.9983	0.0311	0.0045	1.00055	0.28303	0.365968	NOT
NFYC	2022	ES	13	12	14	0	0.9983	0.0224	0.0026	0.99986	0.54177	0.62263	NOT
NFYC	2023	ES	6	1	11	0	0.9884	0.2801	0.0396	1.20889	0.018	0.0316306	UP
CTPS1	2025	AP	2	NA	NA	0	0.9537	0.4263	0.0515	0.51035	0.13542	0.194108	NOT
CTPS1	2026	AP	1	NA	NA	0	0.9537	0.7175	0.0868	1.00221	0.84206	0.879956	NOT
CTPS1	2027	AP	3.1	NA	NA	0	0.9537	0.624	0.068	1.45965	0.11837	0.172032	NOT
CTPS1	2029	AT	20	NA	NA	0	1	0.3297	0.02	0.99409	0.00013	0.00031598	DOWN
CTPS1	2030	ES	3.2:4:5:6	1	7	0	0.9967	0.0341	0.002	1.00041	0.39374	0.480108	NOT
SCMH1	2041	AP	1	NA	NA	0	0.9736	0.8846	0.1426	0.87097	0	0	DOWN
SCMH1	2042	AP	4.1	NA	NA	0	0.9736	0.4921	0.0513	3.03216	0	0	UP
SCMH1	2046	AP	3	NA	NA	0	0.9736	0.7449	0.1165	3.35886	0	0	UP
SCMH1	2047	ES	17	16	18	0	0.9967	0.5887	0.0834	0.96789	0.01005	0.0185183	DOWN
SCMH1	2048	ES	10:11:00	9	12	0	0.9967	0.1402	0.0116	1.00027	0.81026	0.855072	NOT
SCMH1	2049	ES	07:08:00	6	9	0	0.995	0.4516	0.0682	0.99725	0.70881	0.770605	NOT
SCMH1	2050	ES	8	6	9	0	0.8926	0.9187	0.1568	0.96734	0.2205	0.295633	NOT
SCMH1	2051	ES	7	6	8	0	0.9901	0.4828	0.084	1.0157	0.17872	0.246754	NOT
SCMH1	2053	ES	06:07:08	5	9	0	0.995	0.6876	0.0986	1.12151	0	0	UP
SCMH1	2054	ES	06:08:00	5	9	0	0.9653	0.8627	0.1544	1.13501	6e-05	0.000151106	UP
SCMH1	2055	ES	8	5	9	0	0.9289	0.8502	0.1406	1.03098	0.2865	0.369675	NOT
SCMH1	2056	ES	6	5	9	0	0.9421	1	0.1723	1.22028	0	0	UP
SCMH1	2057	ES	06:07:00	5	8	0	0.9917	0.7696	0.1098	1.11087	0	0	UP
SCMH1	2058	ES	6	5	8	0	0.9587	1	0.1605	1.1221	0.00059	0.00131569	UP
FOXJ3	2064	AP	2	NA	NA	0	0.9934	0.9028	0.1921	0.90507	0.05359	0.085094	NOT
FOXJ3	2065	AP	14.1	NA	NA	0	0.9934	0.7716	0.1764	4.01594	0	0	UP
FOXJ3	2067	AP	1	NA	NA	0	0.9934	0.9457	0.1762	0.64738	0	0	DOWN
FOXJ3	2068	RI	14.3	14.2	14.4	0	0.9884	0.4463	0.0443	2.95295	0	0	UP
FOXJ3	2069	ES	10	9	11	0	0.9736	0.5843	0.0845	0.95411	1e-05	2.7e-05	DOWN
ZMYND12	2070	ES	3	2	4	0	0.795	0.3429	0.0615	0.99612	0.4869	0.571077	NOT
PPCS	2072	AP	2.1	NA	NA	0	0.995	0.2013	0.022	1.00526	0.01714	0.0302531	UP
PPCS	2073	AT	4	NA	NA	0	1	0.1183	0.0144	0.99224	0	0	DOWN
PPCS	2075	AD	2.2	2.1	3.1	0	0.9983	0.6776	0.0812	1.11322	0	0	UP
CCDC30	2079	AP	1	NA	NA	0	0.9769	1	0.1837	0.79156	0	0	DOWN
CCDC30	2080	AP	15	NA	NA	0	0.9769	0.5532	0.0557	1.10111	0.70124	0.764221	NOT
CCDC30	2081	AP	5.1	NA	NA	0	0.9769	1	0.1798	2.85579	0	0	UP
PPIH	2096	AP	1	NA	NA	0	0.9967	0.0814	0.0133	1.01533	0	0	UP
PPIH	2100	AT	10	NA	NA	0	1	0.5668	0.045	0.9753	0	0	DOWN
PPIH	2101	AT	9.2	NA	NA	0	1	0.5668	0.045	2.11914	0	0	UP
LEPRE1	2106	RI	14.3	14.2	14.4	0	0.9719	1	0.1924	1.54246	0	0	UP
LEPRE1	2107	RI	14.2:14.3	14.1	14.4	0	0.9934	0.5108	0.0921	1.80608	0	0	UP
LEPRE1	2108	AD	14.2	14.1	14.4	0	0.995	0.5441	0.0747	0.96845	0.48332	0.56784	NOT
C1orf50	2110	AT	4.3	NA	NA	0	0.9983	0.1991	0.0306	0.98096	0	0	DOWN
C1orf50	2112	AA	2.1	1.3	2.2	0	0.9851	0.3125	0.0544	1.24057	0.04291	0.0696723	UP
C1orf50	2115	ES	1.2:1.3:2.2	1.1	3	0	0.8231	0.5858	0.1236	1.04161	0.07128	0.109719	NOT
C1orf50	2116	ES	1.3:2.2	1.1	3	0	0.995	0.1129	0.0167	1.00462	0.07185	0.110469	NOT
C1orf50	2117	RI	1.2	1.1	1.3	0	0.9074	0.5874	0.0984	1.15604	0.10566	0.155673	NOT
CCDC23	2119	AP	1	NA	NA	0	0.9967	0.1732	0.0252	0.9904	3e-05	7.79e-05	DOWN
CCDC23	2120	RI	4.2	4.1	4.3	0	1	0.0792	0.0061	0.99815	0.00023	0.000542935	DOWN
ERMAP	2121	AP	2.1	NA	NA	0	0.9901	0.4228	0.0507	1.99131	2e-05	5.27e-05	UP
ERMAP	2122	AP	3.1	NA	NA	0	0.9901	1	0.1576	1.22262	6e-05	0.000151106	UP
ERMAP	2123	AP	1	NA	NA	0	0.9901	1	0.1753	0.92153	0	0	DOWN
ERMAP	2124	RI	3.3	3.2	3.4	0	0.9686	1	0.1839	1.34995	0	0	UP
ZNF691	2127	ES	3	2.3	4	0	0.9322	1	0.1321	1.89226	0	0	UP
ZNF691	2128	RI	2.2	2.1	2.3	0	0.8132	1	0.238	1.61809	0	0	UP
ZNF691	2131	AD	2.2:2.3	2.1	4	0	0.9554	0.9304	0.2033	1.20495	2e-05	5.27e-05	UP
ZNF691	2132	ES	2.3	2.1	4	0	0.8926	1	0.1688	0.92536	0.00536	0.0103684	DOWN
ZNF691	2133	ES	2.1:2.2:2.3:3	1	4	0	0.8545	1	0.1031	2.72732	0	0	UP
ZNF691	2134	ES	2.1:2.3:3	1	4	0	0.8545	1	0.0981	1.63851	0.0022	0.00452711	UP
ZNF691	2135	ES	2.1:2.2:2.3	1	4	0	0.9752	1	0.2058	1.48082	0	0	UP
ZNF691	2136	ES	2.1:2.3	1	4	0	0.9421	1	0.182	0.89575	0.01549	0.0275766	DOWN
ZNF691	2137	ES	2.1	1	4	0	0.9207	1	0.1751	1.03611	0.57357	0.651481	NOT
SLC2A1	2140	AT	11	NA	NA	0	1	0.19	0.0181	0.98978	0	0	DOWN
EBNA1BP2	2145	AP	2.1	NA	NA	0	0.9967	0.613	0.0866	1.02884	0.00656	0.0124784	UP
EBNA1BP2	2146	AP	1	NA	NA	0	0.9967	0.613	0.0866	0.84028	0.00656	0.0124784	DOWN
WDR65	2147	AT	12.3	NA	NA	0	0.7603	0.777	0.0926	2.00952	1e-05	2.7e-05	UP
WDR65	2148	AT	24	NA	NA	0	0.7603	0.777	0.0926	0.96692	1e-05	2.7e-05	DOWN
TMEM125	2153	AA	2.1	1	2.2	0	0.7868	0.4388	0.0707	0.99426	0.54377	0.624486	NOT
C1orf210	2154	AD	1.2	1.1	2	0	0.8	0.3843	0.072	0.96913	0	0	DOWN
TIE1	2159	AT	24	NA	NA	0	1	0.0667	0.0102	0.99797	0.05388	0.0854891	NOT
TIE1	2160	ES	07:09:00	6	10	0	0.995	0.0589	0.005	0.99928	0.19182	0.262138	NOT
TIE1	2161	ES	9	6	10	0	0.9157	0.3368	0.0314	0.99899	0.81127	0.855921	NOT
TIE1	2162	ES	7	6	9	0	0.9851	0.4658	0.0513	0.95109	0	0	DOWN
ELOVL1	2167	ES	4	3	5	0	0.9983	0.0522	0.0038	0.99891	2e-05	5.27e-05	DOWN
MED8	2170	RI	7.2	7.1	7.3	0	1	0.2452	0.0303	1.038	0	0	UP
MED8	2171	AA	3.1	2.2	3.2	0	0.995	0.0623	0.0095	1.0015	0.20397	0.276507	NOT
MED8	2172	AA	2.1	1	2.2	0	0.9934	0.688	0.0598	0.97271	0.59613	0.672363	NOT
SZT2	2175	AT	7	NA	NA	0	1	0.3539	0.0411	1.29699	0	0	UP
SZT2	2176	AT	5	NA	NA	0	1	0.6826	0.0647	0.92031	0.00974	0.0179879	DOWN
SZT2	2177	AT	74	NA	NA	0	1	0.7853	0.0845	0.97655	0.00026	0.000608752	DOWN
HYI	2182	AT	9	NA	NA	0	1	0.3611	0.0311	0.99793	0.45805	0.543328	NOT
HYI	2183	AD	8.2	8.1	9	0	0.9983	0.8144	0.0954	0.98102	0.48139	0.565982	NOT
HYI	2184	ES	3	2.1	4	1	0.9686	0.5528	0.1136	0.93904	0.00016	0.000384843	DOWN
HYI	2185	AD	2.2	2.1	4	1	0.9686	0.2306	0.0338	0.98259	0.00041	0.000935165	DOWN
PTPRF	2191	ES	12	11	13	0	0.9983	0.5373	0.0327	1.03921	0	0	UP
ST3GAL3	2192	AP	1	NA	NA	0	0.8463	0.3722	0.0598	1.64871	0.00274	0.00555298	UP
ST3GAL3	2194	AP	2	NA	NA	0	0.8463	0.3722	0.0598	0.98178	0.00274	0.00555298	DOWN
ST3GAL3	2195	AT	21	NA	NA	0	1	0.5238	0.031	0.98219	0	0	DOWN
ST3GAL3	2198	AA	19.1	16.2	19.2	0	0.9934	0.0582	0.0045	0.99968	0.45252	0.538067	NOT
ST3GAL3	2199	ES	19.1:19.2:20	16.2	21	0	0.9967	0.1293	0.0195	0.99717	0.25582	0.335522	NOT
ST3GAL3	2201	ES	16.1:16.2:19.1:19.2:20	15.1	21	0	0.8132	0.611	0.1173	1.00138	0.94696	0.961469	NOT
ST3GAL3	2202	ES	16.2:19.1:19.2:20	15.1	21	0	0.9967	0.2939	0.0155	0.99744	0.01145	0.0209032	DOWN
ST3GAL3	2210	ES	16.2	15.1	19.1	0	0.995	0.108	0.0088	0.99942	0.52128	0.6035	NOT
ST3GAL3	2211	AA	16.1	15.1	16.2	0	0.9702	0.3168	0.0433	1.36398	0.00045	0.00102067	UP
ST3GAL3	2213	ES	14:15.1:16.2:19.1:19.2:20	13	21	0	0.9967	0.1322	0.0138	0.99842	0.17074	0.23727	NOT
ST3GAL3	2223	ES	14:15.1:16.2	13	19.1	0	0.9967	0.0672	0.0083	0.99845	0.02915	0.0490441	DOWN
ST3GAL3	2231	ES	12:13:14:15.1:16.2:19.1:19.2:20	9	21	0	0.7917	0.4884	0.0324	0.9966	0.04571	0.0738017	DOWN
ST3GAL3	2232	ES	10:13:14:15.1:16.2:19.1:19.2:20	9	21	0	0.9537	0.4448	0.0276	0.997	0.02154	0.037209	DOWN
ST3GAL3	2233	ES	13:14:15.1:16.2:19.1:19.2:20	9	21	0	0.9967	0.0279	0.0021	0.99974	0.00749	0.0141131	DOWN
ST3GAL3	2272	ES	12	9	13	0	0.9636	0.6816	0.0777	1.81339	0	0	UP
ST3GAL3	2273	ES	10	9	13	0	0.9769	0.5951	0.0705	1.93341	0	0	UP
ST3GAL3	2296	ES	9	6	13	0	0.9851	0.0687	0.0086	1.0011	0.33132	0.415677	NOT
ST3GAL3	2299	ES	7.1:7.2	6	9	0	0.9752	0.3764	0.0559	0.97805	0.68706	0.75208	NOT
ST3GAL3	2464	ES	04:06:09	3.1	13	0	0.9868	0.03	0.0024	1.00002	0.94657	0.961183	NOT
ST3GAL3	2480	ES	4	3.1	6	0	0.9752	0.3134	0.0501	1.00182	0.75362	0.808314	NOT
ST3GAL3	2482	AD	3.2	3.1	4	0	0.9421	0.5557	0.065	1.0148	0.89461	0.9212	NOT
IPO13	2491	AP	16.1	NA	NA	0	0.9967	0.8407	0.1557	7.53332	0	0	UP
IPO13	2492	AP	1	NA	NA	0	0.9967	0.8407	0.1557	0.85778	0	0	DOWN
DPH2	2496	ES	4	3.2	5	0	0.9967	0.0561	0.009	0.99793	0.00744	0.0140259	DOWN
DPH2	2497	ES	3.1:3.2	2.1	4	0	0.7835	0.5332	0.079	1.00394	0.81325	0.857622	NOT
DPH2	2499	ES	3.2	2.1	4	0	0.9835	0.1873	0.0194	0.99578	0.00076	0.00166878	DOWN
DPH2	2500	AA	3.1	2.1	3.2	0	0.9521	0.8872	0.1509	3.64223	0	0	UP
DPH2	2501	AD	2.2	2.1	3.2	0	0.9455	0.8561	0.1241	4.05409	0	0	UP
DPH2	2502	AD	1.3	1.2	2.1	0	0.9372	0.0387	0.0041	1.0004	0.50914	0.591951	NOT
DPH2	2503	AD	1.2:1.3	1.1	2.1	0	0.9802	0.385	0.0514	1.01042	0.0938	0.140173	NOT
ATP6V0B	2505	AP	1.1	NA	NA	0	1	0.4284	0.0408	0.97328	0	0	DOWN
ATP6V0B	2509	RI	7.2	7.1	7.3	0	1	0.3792	0.0471	3.49233	0	0	UP
ATP6V0B	2510	ES	2.1:2.2	1.1	3.2	0	0.9901	0.8914	0.1713	0.84632	0.00064	0.00142023	DOWN
ATP6V0B	2511	ES	2.2	1.1	3.2	0	1	0.1182	0.0186	0.97808	0	0	DOWN
ATP6V0B	2512	AD	1.2	1.1	3.2	0	0.9736	0.5331	0.071	1.90222	1e-05	2.7e-05	UP
B4GALT2	2514	AP	2.1	NA	NA	0	0.762	1	0.2482	1.74455	0	0	UP
B4GALT2	2515	AP	1	NA	NA	0	0.762	1	0.2482	0.77246	0	0	DOWN
B4GALT2	2516	AA	4.1	3	4.2	0	0.9934	0.0388	0.0029	0.99992	0.80859	0.853792	NOT
B4GALT2	2517	AD	2.2	2.1	3	0	0.8562	0.7051	0.142	0.94189	1e-05	2.7e-05	DOWN
CCDC24	2518	AP	2	NA	NA	0	0.8595	0.7595	0.134	1.01199	0.74028	0.796911	NOT
CCDC24	2519	AP	3.1	NA	NA	0	0.8595	0.7838	0.1412	0.92632	0.03682	0.0606166	DOWN
CCDC24	2520	AP	1	NA	NA	0	0.8595	0.7059	0.0873	1.54301	4e-05	0.000102527	UP
CCDC24	2523	AA	8.1	7.3	8.2	0	0.9603	0.4031	0.0618	1.01051	0.10667	0.156951	NOT
CCDC24	2524	RI	7.2	7.1	7.3	0	0.9785	0.3929	0.0485	1.71403	0	0	UP
CCDC24	2525	RI	6.3	6.2	6.4	0	1	0.9758	0.1518	2.34385	0	0	UP
CCDC24	2526	AA	6.1	5	6.2	0	0.9074	0.7439	0.1191	0.91745	0.03062	0.0513071	DOWN
CCDC24	2527	ES	4.1:4.2:5:6.1	3.2	6.2	0	0.8793	0.5756	0.1092	1.0538	0.00113	0.00242159	UP
CCDC24	2528	ES	4.2:5:6.1	3.2	6.2	0	0.762	0.724	0.1276	1.0138	0.33556	0.419925	NOT
CCDC24	2530	ES	4.1:4.2:5	3.2	6.2	0	0.9785	0.5781	0.0641	1.0274	0.00088	0.00191751	UP
CCDC24	2531	ES	4.2:5	3.2	6.2	0	0.924	0.6432	0.083	1.00906	0.27373	0.355604	NOT
CCDC24	2532	AA	4.1	3.2	4.2	0	0.9008	0.9639	0.1748	1.30106	0	0	UP
SLC6A9	2536	AT	16	NA	NA	0	1	0.4462	0.0672	0.99069	0.12902	0.185876	NOT
SLC6A9	2538	AT	17	NA	NA	0	1	0.4462	0.0672	1.06501	0.12901	0.185869	NOT
SLC6A9	2542	ES	06:07:00	2	8	0	0.919	0.3557	0.0396	0.99213	0.02904	0.0488854	DOWN
SLC6A9	2544	ES	6	2	7	0	0.8744	0.2415	0.0412	1.00022	0.96398	0.973359	NOT
DMAP1	2545	RI	1.2:1.3	1.1	1.4	0	0.9851	0.5938	0.129	0.99906	0.96068	0.971044	NOT
DMAP1	2546	AA	1.3	1.1	1.4	0	0.9851	0.5685	0.0703	0.99566	0.6236	0.696574	NOT
DMAP1	2547	RI	1.2	1.1	1.3	0	0.9934	0.8514	0.106	1.02967	0.36908	0.454834	NOT
ERI3	2548	AP	1	NA	NA	0	0.995	0.4104	0.0362	0.99903	0.76883	0.820693	NOT
ERI3	2551	ES	9	8	10	1	0.8909	0.0669	0.0122	0.99561	0.00129	0.00274275	DOWN
ERI3	2552	ES	3	2.2	5	0	0.9983	0.1046	0.0162	1.00536	0.00483	0.00942169	UP
RNF220	2553	AP	3	NA	NA	0	0.9967	0.7051	0.117	181.068	0	0	UP
RNF220	2554	AP	1.1	NA	NA	0	0.9967	0.3234	0.0393	7.47101	0	0	UP
RNF220	2555	AP	7	NA	NA	0	0.9967	0.7504	0.1333	0.85625	0	0	DOWN
RNF220	2557	AT	10.2	NA	NA	0	1	0.2741	0.035	0.64252	0	0	DOWN
RNF220	2558	AT	17	NA	NA	0	1	0.2741	0.035	1.05843	0	0	UP
RNF220	2559	AD	9.2	9.1	10.1	0	0.9967	0.4994	0.0634	1.0568	0	0	UP
TMEM53	2561	AT	5	NA	NA	0	1	0.5856	0.0762	1.20808	0	0	UP
TMEM53	2562	AT	3.3	NA	NA	0	1	0.5856	0.0762	0.89492	0	0	DOWN
TMEM53	2563	AA	3.1	2	3.2	0	0.9901	0.5028	0.0894	0.92372	0	0	DOWN
TMEM53	2568	ES	2	1	4	0	0.8182	0.632	0.117	0.98395	0.26716	0.348353	NOT
KIF2C	2575	ES	7	6	8	0	0.7851	0.3688	0.0711	0.99892	0.92944	0.948144	NOT
RPS8	2577	AD	3.2	3.1	4	0	1	0.0155	0.0017	0.9982	0	0	DOWN
PLK3	2578	ES	13	12	14	1	0.8397	0.4686	0.0658	1.02384	0.04211	0.0684805	UP
BTBD19	2581	AT	7.2	NA	NA	0	0.9884	0.4385	0.0469	1.03201	0.94501	0.960121	NOT
BTBD19	2582	AT	9	NA	NA	0	0.9884	0.4385	0.0469	0.99944	0.94501	0.960121	NOT
BTBD19	2585	ES	03:04:00	2	6	0	0.8413	0.1992	0.0311	0.99748	0.65569	0.725457	NOT
PTCH2	2586	AT	22.2	NA	NA	0	0.9802	0.9928	0.0937	0.99373	0.603	0.67835	NOT
PTCH2	2587	AT	23	NA	NA	0	0.9802	0.9928	0.0937	1.07222	0.603	0.67835	NOT
EIF2B3	2588	AT	10.2	NA	NA	0	1	0.4944	0.0532	1.15264	0.00163	0.00341569	UP
EIF2B3	2589	AT	12	NA	NA	0	1	0.4944	0.0532	0.97905	0.00163	0.00341569	DOWN
HECTD3	2592	RI	8.2	8.1	8.3	0	0.9835	0.3755	0.0637	6.27733	0	0	UP
MUTYH	2593	AP	3	NA	NA	0	0.9934	0.5828	0.097	0.92619	0.20374	0.276245	NOT
MUTYH	2594	AP	2	NA	NA	0	0.9934	1	0.0743	0.91291	0.01457	0.0260891	DOWN
MUTYH	2595	AP	1.1	NA	NA	0	0.9934	1	0.1045	1.04924	0.00176	0.00367164	UP
MUTYH	2600	ES	11:12:13:14:15	10	16	0	0.9934	0.1141	0.0137	0.99676	0.00545	0.0105338	DOWN
MUTYH	2601	ES	08:09:00	7	10	0	0.995	0.2298	0.0233	0.99982	0.93771	0.954521	NOT
MUTYH	2603	ES	8	7	9	0	0.995	0.1529	0.0256	0.99798	0.50718	0.590193	NOT
MUTYH	2608	ES	6.3:6.4:6.5	5	7	0	0.7669	0.4638	0.0784	1.01672	0.15688	0.220869	NOT
MUTYH	2609	ES	6.4:6.5	5	7	0	0.9868	0.3022	0.0352	1.00241	0.52361	0.605559	NOT
MUTYH	2612	ES	6.2:6.3:6.4:6.5:7:8:9:10:11:12:13:14:15:16:17:18	5	19	0	0.8033	0.7206	0.1521	0.96517	0.037	0.0608753	DOWN
MUTYH	2613	ES	6.3:6.4:6.5:7:8:9:10:11:12:13:14:15:16:17:18	5	19	0	0.9041	0.6389	0.1097	0.96989	0.00221	0.00454468	DOWN
MUTYH	2614	ES	6.4:6.5:7:8:9:10:11:12:13:14:15:16:17:18	5	19	0	0.9934	0.6306	0.0494	0.98672	0.00026	0.000608752	DOWN
MUTYH	2615	ES	6.5:7:8:9:10:11:12:13:14:15:16:17:18	5	19	0	0.8661	0.6839	0.1211	0.98488	0.35261	0.437859	NOT
MUTYH	2651	ES	6.3:6.4:6.5:7:8:9	5	10	0	0.8645	0.5819	0.0867	0.9883	0.16057	0.22519	NOT
MUTYH	2652	ES	6.4:6.5:7:8:9	5	10	0	0.9917	0.3583	0.0331	0.99479	0.04027	0.0657487	DOWN
MUTYH	2671	AA	6.4	5	6.5	0	0.9537	0.8069	0.1269	0.92571	0	0	DOWN
MUTYH	2673	AA	6.2:6.3	5	6.4	0	0.7736	0.612	0.1234	1.02108	0.80462	0.850562	NOT
MUTYH	2674	AA	6.3	5	6.4	0	0.8132	0.6595	0.1208	0.99712	0.95697	0.968637	NOT
TOE1	2677	ES	4	3	5	0	0.9868	0.1778	0.0216	1.00061	0.74904	0.804302	NOT
TOE1	2678	ES	2	1	3	0	0.9901	0.1817	0.0124	1.00387	0.05406	0.0857492	NOT
TESK2	2681	AT	5	NA	NA	0	1	0.9308	0.0579	1.20054	0.27581	0.357883	NOT
TESK2	2682	AT	13	NA	NA	0	1	0.9308	0.0579	0.9947	0.27581	0.357883	NOT
TESK2	2683	ES	11	10	12	0	0.876	0.1778	0.0155	0.99879	0.24407	0.322603	NOT
TESK2	2684	ES	2	1	3	0	0.9471	0.2833	0.0348	1.00143	0.67439	0.741601	NOT
CCDC163P	2685	AT	6	NA	NA	0	1	0.2966	0.0305	0.98507	0	0	DOWN
PRDX1	2693	ES	2.2:3:4.1	2.1	4.2	0	1	0.0118	0.0018	0.99999	0.97034	0.977957	NOT
AKR1A1	2695	AT	5.2	NA	NA	0	1	0.2655	0.0384	4.37485	0	0	UP
AKR1A1	2696	AT	10	NA	NA	0	1	0.2655	0.0384	0.95983	0	0	DOWN
AKR1A1	2697	ES	7	6	8	1	0.8579	0.1469	0.0209	0.97402	0	0	DOWN
AKR1A1	2698	ES	2	1	3	0	1	0.8131	0.0713	1.12891	0	0	UP
NASP	2706	ES	9	8	10	0	0.9983	0.9128	0.1515	2.07145	0	0	UP
NASP	2708	ES	7.2	6	8	0	0.9967	0.0201	0.0014	0.99994	0.60086	0.676533	NOT
NASP	2717	ES	00:06:07.200000	3	8	0	0.957	0.334	0.0435	0.99524	0.24382	0.32233	NOT
NASP	2719	ES	00:06:07.200000	3	8	0	0.9967	0.0294	0.0036	0.99979	0.57074	0.648976	NOT
NASP	2729	ES	5:6:7.2:8:9	3	10	0	0.9702	0.854	0.118	1.04925	0.02821	0.0476127	UP
NASP	2731	ES	6:7.2:8:9	3	10	0	0.995	0.6062	0.033	1.00545	0.10115	0.149779	NOT
NASP	2742	ES	5:6:7.2:8	3	10	0	0.9554	0.535	0.0711	0.98952	0.08109	0.12321	NOT
NASP	2744	ES	00:07:02.200000	3	10	0	0.9967	0.0827	0.0078	0.99901	0.06962	0.107398	NOT
NASP	2752	ES	5	3	6	0	0.995	0.3025	0.0418	0.83238	0.00038	0.000870139	DOWN
NASP	2754	ES	2	1	3	0	1	0.8212	0.1435	1.28657	0	0	UP
GPBP1L1	2769	ES	2	1	3	0	0.9818	0.5019	0.064	0.98051	0.00496	0.00965813	DOWN
TMEM69	2770	ES	2	1	3	1	0.8992	0.7322	0.0555	1.02955	0.00016	0.000384843	UP
IPP	2771	AT	9.2	NA	NA	0	1	0.4046	0.0541	0.98115	0.00042	0.000956514	DOWN
IPP	2772	AT	10	NA	NA	0	1	0.4046	0.0541	1.12362	0.00042	0.000956514	UP
MAST2	2774	RI	25.2	25.1	25.3	0	0.9934	0.0169	0.0007	0.99997	0.31777	0.40167	NOT
MAST2	2775	ES	10	9	11	0	0.9901	0.093	0.0156	1.00046	0.8189	0.861926	NOT
PIK3R3	2777	AP	3.1	NA	NA	0	0.9967	0.4004	0.0353	0.99623	0.13338	0.191493	NOT
PIK3R3	2779	ES	10	9	11	0	0.995	0.1314	0.0151	1.00023	0.87401	0.905217	NOT
POMGNT1	2781	AP	2	NA	NA	0	0.9967	0.9817	0.1846	1.41462	0	0	UP
POMGNT1	2783	AP	1	NA	NA	0	0.9967	0.9817	0.1834	0.60143	0	0	DOWN
POMGNT1	2784	RI	22.2	22.1	22.3	0	1	0.0961	0.0116	1.0035	0.00153	0.00321824	UP
POMGNT1	2785	AD	21.2	21.1	22.1	0	1	0.0464	0.0045	0.99959	0.29318	0.376745	NOT
POMGNT1	2786	RI	12.4	12.3	12.5	0	0.9983	0.6919	0.097	5.50628	0	0	UP
POMGNT1	2787	RI	12.2	12.1	12.3	0	0.9983	0.7571	0.1079	5.19277	0	0	UP
POMGNT1	2788	ES	9	8	10	0	0.9983	0.0778	0.009	0.99759	2e-05	5.27e-05	DOWN
NSUN4	2792	AP	1	NA	NA	0	0.9983	0.1077	0.012	1.0006	0.68013	0.746331	NOT
NSUN4	2793	ES	4	3	5	0	0.9967	0.2716	0.0321	0.9932	0.0608	0.0951235	NOT
NSUN4	2794	ES	2.2	1	3	0	0.9455	0.7985	0.1285	0.95707	0.49339	0.577402	NOT
MKNK1	2798	AP	2.1	NA	NA	0	0.9686	0.6581	0.1033	1.00928	0.58297	0.66013	NOT
MKNK1	2800	AP	1	NA	NA	0	0.9686	0.6581	0.1033	0.9819	0.58307	0.660224	NOT
MKNK1	2802	AT	9.2	NA	NA	0	1	0.3347	0.0379	1.31942	0	0	UP
MKNK1	2806	AT	17	NA	NA	0	1	0.4908	0.0441	1.00421	0.36678	0.452684	NOT
MKNK1	2807	ES	16	15.2	17	0	0.9934	1	0.0839	1.00879	0.50792	0.590815	NOT
MKNK1	2808	AA	15.1	14	15.2	0	0.9917	0.2253	0.0423	2.06767	0	0	UP
MKNK1	2809	ES	11	10	12	0	0.9967	0.8106	0.0709	1.1257	0.0248	0.0423373	UP
MKNK1	2810	ES	9.1	8	10	0	0.9917	0.302	0.045	1.02676	2e-05	5.27e-05	UP
MKNK1	2812	ES	7.1	5	8	0	0.9983	0.1358	0.022	1.00528	0.0799	0.121565	NOT
MKNK1	2814	ES	4	3	5	0	0.9901	0.9419	0.1072	1.64568	0	0	UP
MKNK1	2815	AD	2.2	2.1	3	0	0.9537	0.8138	0.1225	1.03101	0.23111	0.307869	NOT
MOB3C	2816	AP	1	NA	NA	0	0.9884	1	0.173	0.85609	0	0	DOWN
MOB3C	2817	AP	2.1	NA	NA	0	0.9884	1	0.173	1.78569	0	0	UP
MOB3C	2818	RI	2.2	2.1	2.3	0	0.9901	0.5195	0.0512	0.99979	0.97195	0.979131	NOT
ATPAF1	2819	AP	1	NA	NA	0	0.9934	0.279	0.0215	0.99259	0	0	DOWN
ATPAF1	2821	ES	09:10:00	8	11	0	0.9983	0.3002	0.0294	0.9938	0.07232	0.111109	NOT
EFCAB14	2823	AT	13	NA	NA	0	1	0.322	0.0561	0.68718	0	0	DOWN
EFCAB14	2824	AT	11	NA	NA	0	1	0.322	0.0561	1.07996	0	0	UP
EFCAB14	2825	ES	7	6	8	0	0.9983	0.6673	0.0931	1.05653	0.00106	0.00228086	UP
CYP4B1	2831	AT	9.2	NA	NA	0	0.805	0.4621	0.0579	2.97639	0.00332	0.00664587	UP
CYP4B1	2832	AT	13	NA	NA	0	0.805	0.4621	0.0579	0.98689	0.00332	0.00664587	DOWN
CYP4A11	2845	AT	12.3	NA	NA	0	0.8331	0.7726	0.046	0.97714	0	0	DOWN
CYP4A11	2849	RI	12.2	12.1	12.3	0	0.9967	0.4359	0.0578	1.01342	0.04367	0.070771	UP
CYP4A11	2850	ES	10	9.4	11.1	0	0.7752	0.5322	0.0655	0.94399	0	0	DOWN
CYP4A11	2853	ES	8:9.2:9.3:9.4:10	7.2	11.1	0	0.8215	0.5846	0.0552	0.97473	3e-05	7.79e-05	DOWN
CYP4A11	2861	ES	8	7.2	9.2	0	0.7934	0.146	0.0099	0.99717	0	0	DOWN
CYP4A11	2866	ES	6.1:6.2	5.2	7.2	0	0.7769	0.6886	0.0987	0.89987	0	0	DOWN
CYP4A11	2875	ES	5.2:6.1:6.2:7.2:8:9.2:9.3	5.1	9.4	0	0.805	0.008	0.0006	1.00005	0.57334	0.651358	NOT
CYP4X1	2888	AP	1	NA	NA	0	0.843	0.9222	0.1751	0.45544	1e-05	2.7e-05	DOWN
CYP4X1	2889	AP	2	NA	NA	0	0.843	0.9222	0.1751	1.15964	1e-05	2.7e-05	UP
CYP4A22	2890	AT	12	NA	NA	0	0.9818	0.2353	0.0232	0.99789	0.29243	0.375963	NOT
PDZK1IP1	2893	AP	2.1	NA	NA	0	0.9785	0.0185	0.0028	1.00642	0	0	UP
CMPK1	2905	AT	7	NA	NA	0	1	0.2936	0.0121	0.99906	0.09739	0.144883	NOT
CMPK1	2907	ES	5	4	6	0	0.9983	0.045	0.0047	1.00027	0.60195	0.677475	NOT
CMPK1	2908	ES	3	1	4	0	0.9983	0.0355	0.0041	0.99932	0.0532	0.0845574	NOT
SLC5A9	2911	ES	8	7	9	0	0.9223	0.4474	0.0555	0.96895	0	0	DOWN
SLC5A9	2912	AA	6.1	5	6.2	0	0.8595	0.2569	0.0489	0.98029	0.00015	0.000362025	DOWN
SPATA6	2916	AP	1	NA	NA	0	0.8975	0.4596	0.07	0.97024	4e-05	0.000102527	DOWN
SPATA6	2917	AP	7	NA	NA	0	0.8975	0.4596	0.07	2.82465	4e-05	0.000102527	UP
SPATA6	2920	AD	13.2	13.1	14	0	0.9736	0.6397	0.0971	0.95575	0.00125	0.00266225	DOWN
SPATA6	2923	ES	4	3	5.2	0	0.8992	0.1722	0.0241	1.00337	0.25783	0.337779	NOT
AGBL4	2927	AT	7	NA	NA	0	0.8298	0.5651	0.0996	2.2695	0	0	UP
AGBL4	2928	AT	16	NA	NA	0	0.8298	0.6707	0.1042	0.96043	0	0	DOWN
FAF1	2938	AP	1.1	NA	NA	0	0.8645	0.6742	0.0511	0.98288	0	0	DOWN
FAF1	2940	RI	1.2	1.1	1.3	0	0.9603	0.3475	0.0318	1.00519	0.16363	0.228794	NOT
CDKN2C	2942	AP	3.1	NA	NA	0	0.9917	0.1544	0.0129	1.00508	0.05644	0.0890592	NOT
TTC39A	2944	AP	1	NA	NA	0	0.9322	0.7169	0.1454	0.76472	2e-05	5.27e-05	DOWN
TTC39A	2946	AP	3	NA	NA	0	0.9322	0.7354	0.1311	0.64972	0	0	DOWN
TTC39A	2947	AP	4	NA	NA	0	0.9322	0.7116	0.1083	1.12872	0.08176	0.124137	NOT
TTC39A	2948	AP	2	NA	NA	0	0.9322	0.9097	0.1615	1.77114	0	0	UP
TTC39A	2950	AT	15.5	NA	NA	0	1	0.5668	0.0576	1.55941	0	0	UP
TTC39A	2951	AT	21	NA	NA	0	1	0.5631	0.0605	0.98049	0	0	DOWN
TTC39A	2953	AD	15.4	15.3	16.1	0	0.9736	0.4934	0.0677	2.17711	0	0	UP
TTC39A	2955	AA	10.1	9	10.2	0	0.957	0.5342	0.0753	1.01869	0.58774	0.664344	NOT
EPS15	2956	AP	1	NA	NA	0	0.9339	0.3291	0.017	0.99817	0.03986	0.0651476	DOWN
EPS15	2958	ES	16:17:00	15	18	0	0.9967	0.0282	0.0024	0.99959	0.0274	0.0463838	DOWN
OSBPL9	2960	AP	9.1	NA	NA	0	0.9835	0.1987	0.0208	0.99479	3e-05	7.79e-05	DOWN
OSBPL9	2969	ES	17	15	18	0	0.995	0.5349	0.0514	0.99022	0.00947	0.0175266	DOWN
OSBPL9	2974	ES	11	9.2	12	0	0.9636	0.0775	0.0056	0.99972	0.46101	0.546336	NOT
OSBPL9	2975	AD	9.2	9.1	11	0	0.9686	0.9101	0.0963	1.02662	0.02186	0.0377199	UP
OSBPL9	2979	ES	6.1	5	7	0	0.9835	0.4891	0.0719	1.04212	0.00124	0.00264216	UP
OSBPL9	2981	ES	5	4	6.1	0	0.9802	0.1176	0.0098	0.99755	8e-05	0.000198597	DOWN
NRD1	2982	AP	1.1	NA	NA	0	0.9802	0.2122	0.0243	0.99871	0.56355	0.642639	NOT
NRD1	2986	ES	26	25	27	0	0.9983	0.4283	0.0468	1.66388	0	0	UP
NRD1	2987	ES	04:05:00	3	6	0	0.9884	0.7312	0.0936	0.91507	0.03226	0.0537993	DOWN
NRD1	2988	AD	1.2	1.1	3	0	0.9983	0.0851	0.0108	1.00369	0.00449	0.00880582	UP
TXNDC12	2989	AT	9	NA	NA	0	1	0.0932	0.0091	1.00342	0.00088	0.00191751	UP
BTF3L4	2993	AT	7	NA	NA	0	1	0.2729	0.0281	0.98113	0	0	DOWN
BTF3L4	2994	ES	5	4	6.1	0	1	0.1431	0.0171	0.98935	0	0	DOWN
BTF3L4	2996	ES	02:03:00	1	4	0	0.8545	0.5056	0.0556	0.90119	0.33257	0.416839	NOT
BTF3L4	2997	ES	2	1	4	0	0.9967	0.1805	0.0259	1.0025	0.38003	0.466111	NOT
ZFYVE9	3000	ES	6	5	7	0	0.9835	0.2735	0.0308	0.99793	0.39421	0.480572	NOT
CC2D1B	3001	AT	24	NA	NA	0	1	0.2871	0.0425	1.60332	0	0	UP
CC2D1B	3002	AT	25.3	NA	NA	0	1	0.2871	0.0425	0.96971	0	0	DOWN
CC2D1B	3003	RI	25.2	25.1	25.3	0	0.9967	0.7111	0.1035	1.88115	0	0	UP
CC2D1B	3004	AA	14.1	13	14.2	0	0.9851	0.6313	0.0785	1.09498	0.06729	0.104204	NOT
ZCCHC11	3009	AA	26.1	25	26.2	0	0.8942	0.8785	0.1256	1.02222	0.35944	0.445039	NOT
ZCCHC11	3010	ES	5	4	6	0	0.9322	0.0641	0.0078	0.99953	0.58214	0.65925	NOT
ZYG11B	3012	AT	15	NA	NA	0	1	0.054	0.0052	0.99912	0.01049	0.0192645	DOWN
ZYG11B	3015	ES	09:10:00	8	12	0	0.9421	0.0601	0.0047	1.001	0.23683	0.314379	NOT
ECHDC2	3019	AT	8.2	NA	NA	0	1	0.2271	0.0501	2.50274	0	0	UP
ECHDC2	3020	AT	5.2	NA	NA	0	1	0.2506	0.0467	2.25627	0	0	UP
ECHDC2	3021	AT	9.2	NA	NA	0	1	0.3262	0.0764	2.62	0	0	UP
ECHDC2	3022	AT	14	NA	NA	0	1	0.7263	0.1597	0.7541	0	0	DOWN
ECHDC2	3023	ES	13	12	14	1	0.9686	0.2087	0.0312	0.98173	0	0	DOWN
ECHDC2	3024	ES	9.1	8.1	10	0	0.9967	0.878	0.1246	0.91262	0	0	DOWN
ECHDC2	3025	AA	6.1	5.1	6.2	0	0.9983	0.6317	0.1124	1.16845	0	0	UP
ECHDC2	3026	ME	3|4	2.1	5.1	0	0.9322	0.9253	0.1153	0.96526	0.45495	0.540354	NOT
ECHDC2	3027	ES	4	2.1	5.1	0	0.9603	1	0.1888	1.59895	0	0	UP
ECHDC2	3028	ES	3	2.1	5.1	0	0.9025	0.8178	0.1679	1.74018	0	0	UP
ECHDC2	3029	AD	2.2	2.1	5.1	0	0.8942	0.8994	0.1308	1.13968	0.00464	0.00908236	UP
ECHDC2	3030	ES	4:5.1:6.1	2.1	6.2	0	0.995	1	0.1471	4.75095	0	0	UP
ECHDC2	3031	ES	3:5.1:6.1	2.1	6.2	0	0.9901	0.8214	0.117	5.00402	0	0	UP
ECHDC2	3032	ES	2.2:5.1:6.1	2.1	6.2	0	0.9835	0.6145	0.086	2.60658	0	0	UP
ECHDC2	3033	ES	5.1:6.1	2.1	6.2	0	0.9917	1	0.1371	2.07591	0	0	UP
ECHDC2	3034	ES	00:04:05.100000	2.1	6.2	0	0.9851	0.7446	0.066	2.85807	0	0	UP
ECHDC2	3035	ES	00:03:05.100000	2.1	6.2	0	0.9802	0.5999	0.0478	2.7816	0	0	UP
ECHDC2	3036	ES	2.2:5.1	2.1	6.2	0	0.9769	0.2929	0.0358	1.50213	0	0	UP
ECHDC2	3037	ES	5.1	2.1	6.2	0	0.9835	0.7805	0.0784	1.29101	6e-05	0.000151106	UP
SCP2	3043	ES	15	14.2	16.1	0	1	0.1881	0.0104	0.9925	0	0	DOWN
SCP2	3044	AA	14.1	13	14.2	0	0.9983	0.0415	0.0038	0.99941	0.03741	0.0614795	DOWN
SCP2	3045	ES	12	11	13	0	1	0.9201	0.1695	2.29546	0	0	UP
SCP2	3046	ES	4	3	5	0	0.9967	0.2675	0.0199	0.99892	0.44937	0.53502	NOT
SCP2	3048	ES	3	2	4	0	0.9901	0.0417	0.0042	1.00012	0.7191	0.779072	NOT
SCP2	3050	ES	2	1	3	0	0.9884	0.0357	0.0035	0.99971	0.28082	0.363425	NOT
PODN	3051	ES	5:6:7:8	4	9	0	0.957	0.2114	0.0217	1.00176	0.52684	0.608504	NOT
SLC1A7	3053	AT	12	NA	NA	0	0.9207	0.4201	0.0584	0.97926	0	0	DOWN
SLC1A7	3054	AT	4	NA	NA	0	0.9207	0.4201	0.0584	5.35737	0	0	UP
MAGOH	3055	ES	3	2	4	0	1	0.2511	0.0274	0.98109	0	0	DOWN
LRP8	3059	ES	17	16	18	0	0.8678	0.6327	0.1103	1.05903	0.00128	0.00272227	UP
NDC1	3067	ES	13.2:14	13.1	15	0	0.9752	0.0682	0.0071	0.99889	0.01377	0.0247766	DOWN
NDC1	3068	ES	8	7	9	0	0.9603	0.1081	0.0072	0.99981	0.75768	0.81162	NOT
NDC1	3069	ES	2	1	3	0	0.8661	0.4356	0.061	1.0152	0.05415	0.0858628	NOT
YIPF1	3071	AP	2	NA	NA	0	0.9901	0.3683	0.0347	0.98293	0	0	DOWN
YIPF1	3074	ES	12	11	13	0	1	0.4989	0.0807	0.95743	0.00072	0.00158655	DOWN
YIPF1	3077	ES	03:04:00	2	5	0	0.9934	0.1879	0.0237	0.99337	0.00108	0.00232136	DOWN
YIPF1	3078	ES	4	2	5	0	0.9769	0.5476	0.0473	0.98536	4e-05	0.000102527	DOWN
YIPF1	3079	ES	3	2	4	0	0.995	0.6863	0.0964	1.04071	0.0058	0.01116	UP
HSPB11	3097	AT	6	NA	NA	0	1	0.9077	0.1123	0.91368	0	0	DOWN
HSPB11	3099	AT	7	NA	NA	0	1	0.8713	0.0815	1.19626	0	0	UP
LRRC42	3101	ES	2	1	3	0	0.9603	0.925	0.1094	1.07871	0.00119	0.00254098	UP
TMEM59	3108	AP	4.1	NA	NA	0	1	0.9861	0.1399	2.7423	0	0	UP
TMEM59	3109	AP	2.1	NA	NA	0	1	0.3013	0.0488	3.29187	0	0	UP
TMEM59	3111	AP	1.1	NA	NA	0	1	0.9842	0.1731	0.82226	0	0	DOWN
TMEM59	3113	AT	8	NA	NA	0	1	0.018	0.001	0.99962	0	0	DOWN
TMEM59	3121	AD	1.2	1.1	2.2	0	1	0.0933	0.0126	1.00308	0.01937	0.0337696	UP
TCEANC2	3123	AP	1	NA	NA	0	0.9802	0.2432	0.0167	0.99789	0.08791	0.132388	NOT
CYB5RL	3128	AT	4.3	NA	NA	0	1	0.9546	0.1586	1.20384	0.01841	0.0322646	UP
CYB5RL	3129	AT	10	NA	NA	0	1	0.9546	0.1586	0.96038	0.01841	0.0322646	DOWN
CYB5RL	3130	ES	08:09:00	7	10	0	0.9983	0.3413	0.0468	1.01575	0.05735	0.0903349	NOT
CYB5RL	3132	ES	8	7	9	0	0.9967	0.6765	0.1441	1.21048	0	0	UP
CYB5RL	3136	ES	4.1	3	5	0	0.8116	0.5671	0.0908	0.99846	0.89799	0.923804	NOT
MRPL37	3138	AT	7	NA	NA	0	1	0.1556	0.0263	0.99951	0.87735	0.908097	NOT
MRPL37	3139	ES	00:03:04.100000	1	4.2	0	1	0.0057	0.0003	1.00003	0.36511	0.451013	NOT
SSBP3	3140	AP	1	NA	NA	0	0.9967	0.1415	0.0102	1.00021	0.82503	0.866791	NOT
SSBP3	3142	ES	8	7	9	0	0.9107	0.1467	0.022	0.99488	0.00233	0.00477359	DOWN
SSBP3	3144	ES	7	6	8	0	0.9917	1	0.0982	0.69066	0	0	DOWN
ACOT11	3145	AT	18	NA	NA	0	1	0.9148	0.1763	3.89542	0	0	UP
ACOT11	3146	AT	16	NA	NA	0	1	0.9148	0.1763	0.66483	0	0	DOWN
FAM151A	3147	ES	6.2:7:8.1	6.1	8.2	0	0.9901	0.0507	0.0033	0.99986	0.50554	0.588523	NOT
MROH7-TTC4	3148	RI	31.2	31.1	31.3	0	0.9835	0.4454	0.054	1.02858	0.01322	0.0238732	UP
MROH7-TTC4	3150	ES	21.2:22	21.1	23	0	0.7818	0.2581	0.0365	0.99396	0.1277	0.184137	NOT
MROH7-TTC4	3152	ES	4	3	5	0	0.9934	0.5143	0.0688	1.0556	1e-05	2.7e-05	UP
MROH7	3155	AP	2.1	NA	NA	0	0.8017	0.594	0.1121	1.08002	0.00029	0.000674512	UP
MROH7	3156	AP	1	NA	NA	0	0.8017	0.594	0.1121	0.48206	0.00029	0.000674512	DOWN
MROH7	3157	AT	20.2	NA	NA	0	0.8017	0.6942	0.0787	1.20074	0.32275	0.40655	NOT
MROH7	3158	AT	27	NA	NA	0	0.8017	0.6942	0.0787	0.99078	0.32275	0.40655	NOT
TTC22	3174	AT	8	NA	NA	0	1	0.3257	0.0365	1.01542	0.01336	0.0241062	UP
TTC22	3175	AT	6	NA	NA	0	1	0.3257	0.0365	0.72872	0.01337	0.0241231	DOWN
DHCR24	3179	AP	1	NA	NA	0	0.9851	0.5357	0.0362	0.98471	0	0	DOWN
DHCR24	3180	ES	7	6	8	0	0.9934	0.0821	0.0047	0.99932	0.0096	0.0177478	DOWN
USP24	3187	ES	16	15	17	0	0.8182	0.1215	0.0112	0.99905	0.25731	0.337204	NOT
USP24	3188	ES	14	13	15	0	0.914	0.2035	0.0169	0.99841	0.17148	0.238175	NOT
OMA1	3205	AT	9	NA	NA	0	0.9983	0.0451	0.0039	0.99958	0.1913	0.261561	NOT
FGGY	3207	AP	1	NA	NA	0	0.9653	0.7258	0.1228	1.09952	2e-05	5.27e-05	UP
FGGY	3208	AP	2	NA	NA	0	0.9653	0.7258	0.1223	0.55114	2e-05	5.27e-05	DOWN
FGGY	3211	AT	22	NA	NA	0	1	0.5918	0.0246	0.99725	0.02389	0.0409203	DOWN
FGGY	3212	ES	15	14	16	0	0.9917	0.2135	0.0324	0.98759	0.82704	0.868243	NOT
FGGY	3213	ES	05:06:00	4	7	0	0.9983	0.1212	0.0202	1.00227	0.24588	0.324571	NOT
FGGY	3214	ES	3	1	4	0	0.8463	0.2404	0.0411	0.94373	0.73975	0.796512	NOT
HOOK1	3215	AP	1	NA	NA	0	0.8612	0.2822	0.0368	1.00659	0.09172	0.137427	NOT
NFIA	3222	AP	2	NA	NA	0	0.9802	0.5787	0.0855	0.7558	0.00565	0.0108882	DOWN
NFIA	3224	AP	4.1	NA	NA	0	0.9802	1	0.1119	1.01342	0.29274	0.376258	NOT
NFIA	3225	ES	13	12	14	0	0.9736	0.4706	0.065	0.96452	0	0	DOWN
NFIA	3226	ES	10	9	11.2	0	0.9702	0.0467	0.0048	0.99976	0.66123	0.730591	NOT
NFIA	3227	ES	6:7:8:9	5	10	0	0.9868	0.1569	0.0102	0.99907	0.14894	0.21105	NOT
NFIA	3229	ES	6	5	7	0	0.9471	0.135	0.017	1.00272	0.23689	0.314437	NOT
TM2D1	3230	AT	5	NA	NA	0	1	0.7565	0.094	2.63599	0	0	UP
TM2D1	3232	AT	8	NA	NA	0	1	0.7565	0.094	0.90485	0	0	DOWN
INADL	3237	AT	40.2	NA	NA	0	0.9983	0.509	0.0587	1.72734	0	0	UP
INADL	3238	AT	38.2	NA	NA	0	0.9983	0.2298	0.0391	1.36258	0	0	UP
INADL	3239	AT	47.3	NA	NA	0	0.9983	0.5407	0.0741	0.9414	0	0	DOWN
INADL	3240	RI	47.2	47.1	47.3	0	1	0.1	0.0087	0.99699	0	0	DOWN
INADL	3241	ES	46	45	47.1	0	0.9868	0.9105	0.091	1.29132	0	0	UP
INADL	3242	AA	41.1	40.1	41.2	0	0.9587	0.1049	0.0086	0.99842	0.00233	0.00477359	DOWN
INADL	3243	ES	1 day, 12:37:00	35	38.1	0	0.914	0.5907	0.0654	1.00337	0.7095	0.771107	NOT
INADL	3244	ES	37	35	38.1	0	0.9818	0.1351	0.0161	0.99724	0.03566	0.0588833	DOWN
INADL	3245	ES	36	35	37	0	0.9752	0.7598	0.087	1.31977	0	0	UP
INADL	3246	ES	31	30	32	0	0.9868	0.2333	0.0313	0.98811	0	0	DOWN
KANK4	3250	ES	3	2	4.2	0	0.8545	0.7286	0.0976	0.99129	0.40959	0.495057	NOT
USP1	3251	AP	2	NA	NA	0	0.9785	0.464	0.0688	1.0457	0	0	UP
USP1	3252	AP	1	NA	NA	0	0.9785	0.464	0.0688	0.69815	0	0	DOWN
DOCK7	3253	AT	51	NA	NA	0	1	0.3554	0.0494	1.01908	0.02508	0.0427704	UP
DOCK7	3254	AT	16	NA	NA	0	1	0.3554	0.0494	0.81427	0.02508	0.0427704	DOWN
DOCK7	3255	AD	34.2	34.1	35	0	0.9306	0.6525	0.0696	0.98659	0.79474	0.842573	NOT
DOCK7	3256	ES	24	23	25	0	0.8661	1	0.1558	0.65499	0	0	DOWN
ATG4C	3257	AD	1.2	1.1	2	0	0.8529	0.8203	0.136	0.98049	0.46621	0.551379	NOT
ITGB3BP	3266	ES	9	8	10	0	0.9967	0.8254	0.1078	1.11982	0.00069	0.00152422	UP
ITGB3BP	3267	ES	2	1	3	0	0.995	0.54	0.0679	2.51966	0	0	UP
DLEU2L	3268	RI	1.2	1.1	1.3	0	0.9388	0.3421	0.0571	0.98447	0.02408	0.0412212	DOWN
PGM1	3269	AP	1	NA	NA	0	0.9983	0.3344	0.0339	0.98311	0	0	DOWN
ROR1	3274	AT	8.2	NA	NA	0	0.9983	0.6196	0.0672	0.72771	0.00032	0.00074028	DOWN
ROR1	3275	AT	10	NA	NA	0	0.9983	0.6196	0.0672	1.04	0.00032	0.00074028	UP
RAVER2	3279	AT	12	NA	NA	0	1	0.0859	0.0076	0.99889	0.05426	0.0860262	NOT
RAVER2	3280	ES	9	8	10.1	0	0.9917	0.2319	0.018	0.99785	0.09956	0.14774	NOT
RAVER2	3281	ES	7.1:7.2:8:9:10.1	6	10.2	0	0.8727	0.4165	0.06	0.99316	0.21443	0.288675	NOT
RAVER2	3282	ES	7.2:8:9:10.1	6	10.2	0	0.9884	0.1406	0.0105	0.99934	0.47772	0.56241	NOT
RAVER2	3285	AA	7.1	6	7.2	0	0.8661	0.454	0.0784	0.86193	0.01649	0.0291803	DOWN
AK4	3287	AP	4.1	NA	NA	0	0.9256	0.8243	0.1237	0.90357	0	0	DOWN
AK4	3288	AP	1	NA	NA	0	0.9256	0.5342	0.0857	1.14829	0.05555	0.0878329	NOT
AK4	3289	AP	3	NA	NA	0	0.9256	0.4427	0.0719	1.49107	0	0	UP
LEPR	3295	AT	22	NA	NA	0	1	0.8165	0.1499	0.64627	0	0	DOWN
LEPR	3297	AT	21	NA	NA	0	1	0.8466	0.1531	1.34897	0	0	UP
PDE4B	3302	AP	11	NA	NA	0	0.9587	0.6202	0.0767	0.3102	0	0	DOWN
PDE4B	3306	AP	10.1	NA	NA	0	0.9587	0.7479	0.0944	1.08112	0.00013	0.00031598	UP
SGIP1	3307	AP	23.1	NA	NA	0	0.9455	0.9836	0.2116	2.30283	0	0	UP
SGIP1	3308	AP	2	NA	NA	0	0.9455	0.5656	0.0999	0.78092	0.00491	0.00956825	DOWN
SGIP1	3311	AP	3.1	NA	NA	0	0.9455	0.951	0.196	0.76003	0	0	DOWN
SGIP1	3319	ES	07:08:00	5	9	0	0.7521	0.1106	0.0061	0.99946	0.11045	0.16185	NOT
SGIP1	3322	ES	7	5	8	0	0.7769	0.9258	0.1558	1.08122	0.01942	0.033841	UP
WDR78	3325	AP	1	NA	NA	0	0.9355	0.4559	0.0668	0.97474	0	0	DOWN
WDR78	3326	AP	2	NA	NA	0	0.9355	0.4559	0.0668	2.32393	0	0	UP
WDR78	3327	AT	11.2	NA	NA	0	1	0.6466	0.0769	1.58558	0	0	UP
WDR78	3328	AT	3.2	NA	NA	0	1	0.4484	0.0502	3.33343	0	0	UP
WDR78	3330	AT	18	NA	NA	0	1	0.8894	0.1063	0.93124	0	0	DOWN
WDR78	3331	ES	15	14	16	0	0.8826	0.8059	0.1304	1.0177	0.27675	0.359003	NOT
MIER1	3332	AP	4	NA	NA	0	0.9455	0.7518	0.1214	1.09268	4e-05	0.000102527	UP
MIER1	3333	AP	1	NA	NA	0	0.9455	0.7518	0.1214	0.84068	4e-05	0.000102527	DOWN
MIER1	3336	AT	16.4	NA	NA	0	1	0.3009	0.0157	1.00124	0.3323	0.416583	NOT
MIER1	3337	RI	16.3	16.2	16.4	0	1	0.2258	0.0164	0.99833	0.16927	0.235499	NOT
MIER1	3338	RI	16.2:16.3	16.1	16.4	0	1	0.355	0.0326	0.98925	0	0	DOWN
MIER1	3340	ES	6.1	5	7	0	0.9917	0.2444	0.0166	1.0003	0.80995	0.854818	NOT
MIER1	3342	ES	3.1:3.2	2	5	0	0.7934	0.884	0.1562	0.93445	0.18253	0.251299	NOT
SLC35D1	3344	AP	1	NA	NA	0	0.9636	0.4865	0.0698	0.9679	0	0	DOWN
SLC35D1	3345	AP	2.1	NA	NA	0	0.9636	0.4865	0.0698	4.26803	0	0	UP
SLC35D1	3346	AT	12	NA	NA	0	1	0.827	0.0847	1.62444	0	0	UP
SLC35D1	3347	AT	13	NA	NA	0	1	0.827	0.0847	0.93825	0	0	DOWN
SERBP1	3354	AA	5.1	4.2	5.2	0	1	0.3078	0.0428	1.08417	0	0	UP
SERBP1	3355	AA	4.1	3	4.2	0	0.9983	0.5739	0.0469	0.92316	0	0	DOWN
GADD45A	3356	ES	2	1	3	0	0.9983	0.0792	0.0075	0.99756	0	0	DOWN
WLS	3361	AT	13	NA	NA	0	1	0.4337	0.0732	0.92988	0	0	DOWN
WLS	3362	AT	14	NA	NA	0	1	0.4358	0.0735	1.32036	0	0	UP
WLS	3364	ES	3.1:3.2	1	4	0	0.9967	0.0493	0.0042	0.99964	0.18841	0.258186	NOT
WLS	3367	AA	3.1	1	3.2	0	0.9835	0.0217	0.0019	0.99994	0.65615	0.725945	NOT
DEPDC1	3369	ES	8	7	9	0	0.7504	0.8887	0.2447	0.97708	0.77984	0.829838	NOT
SRSF11	3370	AP	1	NA	NA	0	0.9901	0.7473	0.1226	0.77419	0	0	DOWN
SRSF11	3373	AP	3.1	NA	NA	0	0.9901	0.7473	0.1249	1.12631	0	0	UP
SRSF11	3379	AA	15.1	14	15.2	0	0.9983	0.6095	0.0577	0.95239	0	0	DOWN
SRSF11	3380	RI	6.4	6.3	6.5	0	0.9901	0.6349	0.1009	0.99122	0.66834	0.736617	NOT
SRSF11	3381	RI	6.2	6.1	6.3	0	0.995	0.5271	0.0456	1.02774	0.00069	0.00152422	UP
SRSF11	3382	ES	5:6.1:6.2	4.2	6.3	0	0.9934	0.5615	0.0857	1.07221	0.00034	0.000784217	UP
SRSF11	3386	ES	5	4.2	6.1	0	0.8314	0.6766	0.1093	1.06095	0.02857	0.0481746	UP
SRSF11	3387	ES	5:6.1:6.2:6.3:6.4	4.2	6.5	0	0.9967	1	0.2117	3.79243	0	0	UP
SRSF11	3388	AA	6.1:6.2:6.3:6.4	4.2	6.5	0	0.9868	1	0.1046	3.98362	0	0	UP
SRSF11	3391	AA	6.3:6.4	4.2	6.5	0	0.9934	0.7317	0.0888	4.32595	0	0	UP
SRSF11	3392	ES	5:6.1:6.2:6.3	4.2	6.5	0	0.995	0.8713	0.1888	4.7164	0	0	UP
SRSF11	3393	ES	6.1:6.2:6.3	4.2	6.5	0	0.9851	0.5801	0.0766	5.08018	0	0	UP
SRSF11	3396	ES	6.3	4.2	6.5	0	0.9901	0.5957	0.0627	4.27987	0	0	UP
SRSF11	3397	AA	4.1	3.3	4.2	0	0.9983	0.0185	0.0019	0.99966	0.0014	0.00296163	DOWN
ANKRD13C	3399	ES	3	2	4	0	0.9818	0.0967	0.0141	0.99945	0.67731	0.744045	NOT
HHLA3	3401	AT	5	NA	NA	0	1	0.3904	0.0222	0.98957	0	0	DOWN
HHLA3	3402	ES	4	3	5	0	0.9934	0.6506	0.1095	1.13524	0	0	UP
HHLA3	3405	AD	1.3	1.2	3	0	0.9686	0.8538	0.1141	0.88758	0.00065	0.00144071	DOWN
HHLA3	3406	ES	2.1:2.2	1.1	3	0	0.9785	0.5509	0.0926	1.18305	0.04228	0.068742	UP
HHLA3	3408	AD	1.2:1.3	1.1	3	0	0.9785	0.7487	0.106	1.09353	0.01496	0.0267145	UP
HHLA3	3409	AD	1.2	1.1	3	0	0.9851	0.689	0.1062	1.187	0	0	UP
CTH	3410	ES	5	4	6	0	0.9256	0.2333	0.0322	0.99589	0.07877	0.119948	NOT
CTH	3411	ES	3	2	4	0	0.8612	0.3123	0.0252	0.99763	0.12657	0.182684	NOT
PTGER3	3412	AT	2.3	NA	NA	0	1	0.614	0.105	0.84847	0	0	DOWN
PTGER3	3413	AT	12	NA	NA	0	1	0.6453	0.1123	1.7146	0	0	UP
PTGER3	3415	AT	4	NA	NA	0	1	0.6595	0.1017	0.706	0	0	DOWN
PTGER3	3416	AT	8	NA	NA	0	1	0.9469	0.1302	3.61249	0	0	UP
PTGER3	3431	ES	03:05:00	2.1	12	0	0.8364	0.9613	0.1727	0.86021	0	0	DOWN
PTGER3	3432	ES	5	2.1	12	0	0.7702	0.981	0.1611	0.9346	0.05356	0.0850536	NOT
PTGER3	3434	ES	3	2.1	5	0	0.8182	1	0.1372	0.9169	2e-05	5.27e-05	DOWN
ZRANB2	3436	ES	10	9	11	0	1	0.714	0.0949	1.21168	0	0	UP
NEGR1	3438	AP	1	NA	NA	0	0.8744	0.3175	0.0195	0.99669	0.00077	0.00168975	DOWN
NEGR1	3439	ES	5	4	6	0	0.757	0.2354	0.0191	0.99906	0.59897	0.674853	NOT
LRRIQ3	3442	AT	4	NA	NA	0	0.9074	0.8794	0.1746	1.02593	0.17673	0.24444	NOT
LRRIQ3	3443	AT	11	NA	NA	0	0.9074	0.8794	0.1746	0.89564	0.17681	0.244541	NOT
LRRIQ3	3447	ES	3	2	5	0	0.7603	0.5412	0.0595	1.00767	0.2053	0.278067	NOT
FPGT	3450	RI	5.2:5.3	5.1	5.4	0	0.9983	0.0935	0.0125	1.00038	0.7888	0.837607	NOT
FPGT	3451	AA	5.1:5.2	4	5.3	0	0.9983	0.1605	0.0097	1.00096	0.31884	0.402602	NOT
FPGT	3452	ES	3	2.1	4	0	0.9901	0.9739	0.1205	2.23825	0	0	UP
FPGT	3453	AD	2.2	2.1	4	0	0.9603	0.4884	0.0659	0.95916	0.37268	0.458499	NOT
FPGT-TNNI3K	3455	AT	25	NA	NA	0	0.9884	0.9703	0.1548	0.86712	0.24931	0.328414	NOT
FPGT-TNNI3K	3456	AT	5	NA	NA	0	0.9884	0.6399	0.1065	1.29069	0.05727	0.0902203	NOT
FPGT-TNNI3K	3457	AT	29	NA	NA	0	0.9884	0.9371	0.2518	0.7298	0	0	DOWN
FPGT-TNNI3K	3458	AT	20.2	NA	NA	0	0.9884	0.9882	0.2142	1.76009	0	0	UP
CRYZ	3467	ES	8	7	9	0	0.9983	0.5103	0.0376	0.98874	2e-05	5.27e-05	DOWN
CRYZ	3468	ES	5	4	6	0	0.9983	0.6337	0.0377	0.99521	0.06381	0.099375	NOT
CRYZ	3469	ES	02:03:00	1	4	0	0.9901	0.2579	0.0387	0.98575	0	0	DOWN
CRYZ	3470	ES	3	1	4	0	1	0.1353	0.0104	0.99917	0.38891	0.475211	NOT
CRYZ	3471	ES	2	1	3	0	0.9934	0.638	0.0717	0.85291	0	0	DOWN
TYW3	3472	ES	4	3	5	0	0.9967	0.1719	0.0194	0.99869	0.52701	0.608655	NOT
TYW3	3474	ES	03:04:05	1	6	0	0.9967	0.0193	0.0016	0.99984	0.18552	0.254749	NOT
SLC44A5	3480	AT	24	NA	NA	0	0.9868	1	0.2144	1.66198	0	0	UP
SLC44A5	3481	AT	25	NA	NA	0	0.9868	1	0.2144	0.78937	0	0	DOWN
ACADM	3483	AT	14	NA	NA	0	1	0.1599	0.0203	0.98701	0	0	DOWN
ACADM	3489	ES	06:07:00	4.2	8	0	0.9983	0.0733	0.0034	0.99955	0.007	0.0132593	DOWN
ACADM	3492	ES	6	4.2	7	0	0.9967	0.2956	0.0177	0.99301	0	0	DOWN
ACADM	3499	ES	3:4.2:6:7	2.2	8	0	0.9983	0.05	0.0023	0.99979	0.04536	0.0732873	DOWN
ACADM	3508	ES	3	2.2	4.2	0	0.9967	0.0011	0	1	0.31777	0.40167	NOT
ACADM	3509	ES	2.1:2.2	1	3	0	0.7669	1	0.1356	0.747	0.00105	0.00226182	DOWN
ACADM	3510	ES	2.2	1	3	0	0.9934	0.33	0.0392	0.97859	0	0	DOWN
RABGGTB	3513	AT	11	NA	NA	0	1	0.1862	0.0279	0.97628	0	0	DOWN
RABGGTB	3514	ES	05:06:00	4.1	7	0	0.9983	0.6401	0.1062	2.27333	0	0	UP
PIGK	3517	AT	11	NA	NA	0	1	0.1755	0.0109	0.99998	0.98067	0.98556	NOT
PIGK	3519	ES	03:04:00	2	5	0	0.995	0.0494	0.0058	1.00175	0.00629	0.0120119	UP
PIGK	3520	ES	02:03:04	1	5	0	0.9967	0.0887	0.0094	1.00125	0.1722	0.239033	NOT
AK5	3523	AP	1	NA	NA	0	0.9736	0.9833	0.1524	0.40209	0	0	DOWN
AK5	3524	AP	14	NA	NA	0	0.9736	0.9902	0.1539	1.22665	0	0	UP
ZZZ3	3525	AP	1	NA	NA	0	0.8777	0.9225	0.1613	1.14595	0.00022	0.000520315	UP
ZZZ3	3526	AP	2	NA	NA	0	0.8777	0.9225	0.1613	0.88436	0.00022	0.000520315	DOWN
ZZZ3	3527	ES	6	5	7	0	0.9983	0.1942	0.0255	1.00578	0.10125	0.149906	NOT
USP33	3531	AT	25	NA	NA	0	1	0.1467	0.016	0.98728	0	0	DOWN
USP33	3532	ES	23	22.1	24	1	0.7967	0.1411	0.0195	1.00118	0.60367	0.679002	NOT
USP33	3533	AA	15.1	14	15.2	0	0.9785	0.5883	0.082	0.90186	0	0	DOWN
USP33	3534	ES	2	1	3	0	1	0.6884	0.1134	1.23314	0	0	UP
FAM73A	3535	AA	15.1	14	15.2	0	0.8562	0.7439	0.1103	0.92135	0.00607	0.0116227	DOWN
FAM73A	3536	ES	2	1	3	0	0.9455	0.2242	0.0291	0.99978	0.93517	0.952688	NOT
NEXN	3537	AT	6	NA	NA	0	1	0.5137	0.0468	2.42434	0	0	UP
NEXN	3538	AT	14.3	NA	NA	0	1	0.5137	0.0468	0.97458	0	0	DOWN
NEXN	3539	RI	14.2	14.1	14.3	0	0.9124	0.1728	0.0097	1.00107	0.37544	0.461302	NOT
NEXN	3540	ES	7	5	8	0	0.8694	0.686	0.1136	0.97661	0.09106	0.136603	NOT
NEXN	3541	ES	3	2	4	0	0.8248	1	0.1498	1.07729	0.08629	0.130237	NOT
FUBP1	3542	AT	23	NA	NA	0	1	0.3082	0.0574	1.43189	0	0	UP
FUBP1	3543	AT	21.2	NA	NA	0	1	0.3082	0.0574	0.95229	0	0	DOWN
FUBP1	3544	AA	21.1	20	21.2	0	0.9983	0.5753	0.0803	2.49432	0	0	UP
FUBP1	3545	AA	6.1	5	6.2	0	0.9818	0.5292	0.0667	0.9508	0.00973	0.0179739	DOWN
FUBP1	3546	ES	3	2	4	0	0.9818	0.3725	0.0466	1.0769	0.10821	0.158941	NOT
IFI44L	3553	ES	2	1	3	0	0.9769	0.9793	0.2903	1.11818	0.14725	0.20898	NOT
IFI44	3554	AT	7.2	NA	NA	0	1	0.4544	0.0573	1.34171	0	0	UP
IFI44	3555	AT	9	NA	NA	0	1	0.4544	0.0573	0.97252	0	0	DOWN
IFI44	3557	ES	2	1	3	0	0.9967	0.349	0.053	1.0266	0.00061	0.00135664	UP
LPHN2	3564	ES	29	27	31	1	0.9868	0.5851	0.0875	1.48968	0	0	UP
LPHN2	3565	ES	28	27	31	0	0.9835	0.7736	0.0619	0.6846	0.00018	0.000430536	DOWN
LPHN2	3569	ES	27	26	31	0	0.9983	0.126	0.0102	0.99801	0.03006	0.0504411	DOWN
LPHN2	3571	ES	15	14	16	0	0.9686	0.6842	0.0885	0.98955	0.74132	0.797686	NOT
LPHN2	3572	AA	12.1	11	12.2	0	0.9934	0.1008	0.0064	1.0006	0.33517	0.419507	NOT
TTLL7	3582	ES	2:3:4:5:6.2:7:8	1	9	0	0.9405	0.3558	0.0209	0.99845	0.32091	0.404573	NOT
PRKACB	3584	AP	1	NA	NA	0	0.9835	1	0.1643	1.41645	0	0	UP
PRKACB	3585	AP	2	NA	NA	0	0.9835	1	0.1638	0.82392	0	0	DOWN
PRKACB	3587	AT	17	NA	NA	0	1	0.1938	0.0271	0.98857	1e-05	2.7e-05	DOWN
PRKACB	3588	AT	15.2	NA	NA	0	1	0.1938	0.0271	1.29939	1e-05	2.7e-05	UP
PRKACB	3590	ES	10	9	11	0	0.9851	0.092	0.0085	1.00093	0.25851	0.338528	NOT
RPF1	3603	AT	9	NA	NA	0	1	0.1256	0.0066	0.99759	0	0	DOWN
GNG5	3605	ES	2	1.3	3	1	0.9934	0.105	0.0169	0.99135	1e-05	2.7e-05	DOWN
GNG5	3606	RI	1.2	1.1	1.3	0	0.9074	0.9578	0.1887	0.99036	0.84366	0.881308	NOT
CTBS	3607	ES	3	2	4	0	0.9967	0.4953	0.0525	1.03521	0	0	UP
CTBS	3608	AD	1.2	1.1	2	0	0.9884	0.3911	0.0435	1.10393	0.02408	0.0412212	UP
SSX2IP	3612	AT	17	NA	NA	0	1	0.2144	0.0265	0.99051	0	0	DOWN
SSX2IP	3625	ES	4.1:4.2:5:6:7:8:9:10:11:12:13	2.2	15	0	0.7587	0.402	0.0497	1.01436	0.05373	0.0852873	NOT
SSX2IP	3630	ES	4.1:4.2	2.1	5	0	0.8165	0.6035	0.1208	1.12611	0	0	UP
MCOLN3	3645	AT	10.4	NA	NA	0	0.9174	0.5	0.1079	3.23054	0	0	UP
MCOLN3	3646	AT	14	NA	NA	0	0.9174	0.5	0.1079	0.90511	0	0	DOWN
C1orf52	3654	AT	4	NA	NA	0	1	0.015	0.0008	1.00018	0.3834	0.469615	NOT
DDAH1	3656	AP	3	NA	NA	0	0.9983	0.8474	0.1438	0.88547	0	0	DOWN
DDAH1	3657	AP	1	NA	NA	0	0.9983	0.8474	0.1401	3.1399	0	0	UP
ZNHIT6	3663	RI	1.2	1.1	1.3	0	0.9934	0.2212	0.0384	0.99731	0.49195	0.576023	NOT
ODF2L	3667	AP	1	NA	NA	0	0.9934	0.1611	0.0307	1.01614	4e-05	0.000102527	UP
ODF2L	3668	AT	20.2	NA	NA	0	1	0.91	0.1133	1.16972	0	0	UP
ODF2L	3671	AT	3.3	NA	NA	0	1	0.91	0.1133	0.78214	0	0	DOWN
ODF2L	3672	AA	20.1	19	20.2	0	1	0.6603	0.1015	1.20133	0	0	UP
ODF2L	3673	ES	16	15	17	0	0.9107	0.5291	0.0939	1.5416	2e-05	5.27e-05	UP
ODF2L	3675	ES	15	14	17	0	0.995	0.6582	0.1168	1.19923	0	0	UP
ODF2L	3676	ES	12	11	13	0	0.9504	0.5523	0.056	1.30633	0.00534	0.0103329	UP
ODF2L	3678	ES	4	3.2	5	0	0.9884	0.469	0.0881	0.98932	0.26127	0.341651	NOT
ODF2L	3679	AA	3.1	1	3.2	0	0.8645	0.2146	0.0314	1.00099	0.77456	0.825559	NOT
SH3GLB1	3686	ES	2	1	3	0	0.9983	0.1107	0.0156	1.01175	0	0	UP
2023-09-15	3687	ES	5	4	6	0	0.9983	0.1242	0.0115	0.99867	0.24703	0.325881	NOT
HS2ST1	3689	AP	1	NA	NA	0	0.995	0.1411	0.0088	0.9988	0.01006	0.0185359	DOWN
HS2ST1	3691	AT	8	NA	NA	0	1	0.4869	0.0636	1.11771	0	0	UP
HS2ST1	3692	AT	6.2	NA	NA	0	1	0.4738	0.0596	0.49945	0	0	DOWN
LMO4	3694	AP	1	NA	NA	0	0.9967	0.5554	0.0894	1.06507	0	0	UP
LMO4	3695	AP	2	NA	NA	0	0.9967	0.5554	0.0894	0.79215	0	0	DOWN
PKN2	3696	AP	1	NA	NA	0	0.9736	0.622	0.0459	0.9805	0	0	DOWN
PKN2	3698	AT	12.4	NA	NA	0	1	0.9789	0.0728	1.8723	0	0	UP
PKN2	3699	AT	22	NA	NA	0	1	0.9789	0.0728	0.94335	0	0	DOWN
PKN2	3700	RI	12.2	12.1	12.3	0	0.9157	0.6743	0.0802	2.65485	0	0	UP
PKN2	3701	ES	10	9	11	0	0.9818	0.074	0.007	0.99958	0.48765	0.571741	NOT
PKN2	3702	ES	2	1	3	0	0.9835	0.1836	0.0133	1.00211	0.19461	0.265465	NOT
CCBL2	3704	ES	2	1	3	0	0.9835	0.7704	0.097	0.89437	0	0	DOWN
RBMXL1	3705	ES	2	1	3	0	0.8826	0.7094	0.1341	0.94282	0.00149	0.00314135	DOWN
GBP3	3708	ES	08:09:00	7	10	0	0.9967	0.8479	0.1924	0.95875	0.04307	0.0698957	DOWN
GBP3	3709	AD	5.2	5.1	6	0	0.9901	0.9053	0.1569	1.50874	0	0	UP
GBP3	3710	ES	3	2.1	4	0	0.9769	1	0.0972	0.99125	0.73595	0.793439	NOT
GBP2	3712	AP	1	NA	NA	0	0.9868	0.5916	0.0432	0.79218	0.00725	0.0136919	DOWN
GBP2	3713	AP	4.1	NA	NA	0	0.9868	0.5916	0.0432	1.01518	0.00725	0.0136919	UP
GBP2	3714	AT	14.2	NA	NA	0	0.9983	0.512	0.0817	0.93215	0.15533	0.218934	NOT
GBP2	3715	AT	15	NA	NA	0	0.9983	0.512	0.0817	1.02213	0.15537	0.218957	NOT
LRRC8C	3725	AT	5	NA	NA	0	1	0.1208	0.0111	0.997	0.00594	0.0113948	DOWN
LRRC8D	3726	AP	2	NA	NA	0	0.8711	1	0.1787	0.80983	0	0	DOWN
LRRC8D	3727	AP	1	NA	NA	0	0.8711	1	0.1787	1.40932	0	0	UP
ZNF326	3728	AT	12	NA	NA	0	1	0.6755	0.0932	0.9387	0	0	DOWN
ZNF326	3729	AT	4.2	NA	NA	0	1	0.6755	0.0932	1.31423	0	0	UP
ZNF326	3730	AA	5.1	4.1	5.2	0	0.9917	0.3579	0.0242	0.99839	0.35689	0.442409	NOT
ZNF644	3731	AP	2	NA	NA	0	0.9256	0.7803	0.1251	1.34689	2e-05	5.27e-05	UP
ZNF644	3732	AP	1	NA	NA	0	0.9256	0.7803	0.1251	0.9382	2e-05	5.27e-05	DOWN
ZNF644	3733	ES	04:05:00	3	6	0	0.9983	0.3948	0.0516	0.97306	0	0	DOWN
CDC7	3738	ES	4	3	5	0	0.7785	0.2146	0.0179	0.99682	0.00061	0.00135664	DOWN
TGFBR3	3739	AP	3	NA	NA	0	0.9983	0.8887	0.2319	0.54282	0	0	DOWN
TGFBR3	3741	AP	4.1	NA	NA	0	0.9983	0.7486	0.1531	1.84174	0	0	UP
TGFBR3	3742	AP	1	NA	NA	0	0.9983	0.574	0.0988	3.11601	0	0	UP
TGFBR3	3743	AA	20.1	19	20.2	0	0.9702	0.0903	0.0054	1.00083	0.08302	0.125845	NOT
TGFBR3	3746	ES	5	4.2	6	0	0.9983	0.7859	0.2104	1.87691	0	0	UP
BTBD8	3753	AT	9	NA	NA	0	0.957	1	0.2566	0.63718	0	0	DOWN
BTBD8	3754	AT	6.2	NA	NA	0	0.957	1	0.2566	2.78401	0	0	UP
GLMN	3757	ES	14	13	15	0	0.9917	0.1247	0.0172	0.99667	0.04493	0.0726271	DOWN
GLMN	3758	ES	12	11	13	0	0.9306	0.3591	0.0769	0.98088	0.02416	0.0413373	DOWN
MTF2	3770	ES	11	10	12	0	0.9967	0.3291	0.05	1.00736	0.25057	0.329725	NOT
MTF2	3771	RI	2.2	2.1	2.3	0	0.9471	0.3482	0.0436	0.98709	0.00095	0.00205935	DOWN
MTF2	3772	ES	2.1:2.2:2.3:3	1	4	0	0.9802	0.1839	0.0318	0.99188	0.00341	0.00680961	DOWN
TMED5	3776	RI	4.2	4.1	4.3	0	0.8496	0.8697	0.186	1.00421	0.86803	0.900946	NOT
TMED5	3779	ES	3	2	4.1	0	0.9967	0.3218	0.0349	1.14063	0.00045	0.00102067	UP
CCDC18	3780	ES	28	27	29	0	0.8397	0.785	0.2024	0.88892	0.0049	0.00954976	DOWN
DR1	3785	RI	1.2	1.1	1.3	0	0.9835	0.0644	0.0036	0.99959	0.01397	0.0251098	DOWN
FNBP1L	3788	RI	16.2	16.1	16.3	0	0.9983	0.708	0.1148	0.84337	0	0	DOWN
BCAR3	3793	AP	11	NA	NA	0	0.9636	0.9549	0.2189	0.50541	0	0	DOWN
BCAR3	3794	AP	1	NA	NA	0	0.9636	0.7144	0.0849	1.57186	1e-05	2.7e-05	UP
BCAR3	3795	AP	8	NA	NA	0	0.9636	1	0.2502	2.15459	0	0	UP
BCAR3	3796	AP	4	NA	NA	0	0.9636	0.8377	0.1424	1.04525	0.56619	0.644823	NOT
DNTTIP2	3797	ES	3	2	4	0	0.9983	0.0407	0.0054	1.00044	0.50094	0.584407	NOT
ARHGAP29	3805	AP	2	NA	NA	0	0.9025	0.1047	0.0065	0.99923	0.01586	0.0281762	DOWN
ARHGAP29	3806	AT	24.2	NA	NA	0	1	0.2139	0.0184	0.98785	0	0	DOWN
ABCD3	3810	AT	10	NA	NA	0	1	0.7395	0.0599	2.6653	0	0	UP
ABCD3	3811	AT	25	NA	NA	0	1	0.7395	0.0599	0.94399	0	0	DOWN
ABCD3	3812	ES	12:13:14:15	11	16	0	0.9967	0.0178	0.0013	1	0.98591	0.98914	NOT
ABCD3	3814	ES	3	1	4	0	0.9537	0.1097	0.017	0.99973	0.83448	0.873942	NOT
ABCD3	3815	ES	2	1	3	0	0.9107	0.6273	0.0615	1.46812	1e-05	2.7e-05	UP
F3	3816	ES	5	4	6	0	0.9521	0.4773	0.058	0.99965	0.93171	0.949785	NOT
SLC44A3	3817	AP	1	NA	NA	0	0.9355	0.7716	0.1165	0.99941	0.97015	0.977845	NOT
SLC44A3	3818	AP	2	NA	NA	0	0.9355	0.7716	0.1165	1.00127	0.97014	0.977845	NOT
SLC44A3	3819	AA	13.1	12	13.2	0	0.9934	0.8051	0.0718	0.95326	0	0	DOWN
SLC44A3	3820	AD	5.2	5.1	6	0	0.9851	0.4052	0.0519	1.03073	0	0	UP
SLC44A3	3821	ES	3	1	4	0	0.9587	0.4045	0.0533	1.0145	0.00394	0.00779632	UP
CNN3	3822	AP	1.1	NA	NA	0	0.9917	0.9053	0.0958	1.00391	0.79165	0.840108	NOT
CNN3	3823	AP	2	NA	NA	0	0.9917	0.9053	0.0958	0.95301	0.79168	0.840116	NOT
CNN3	3824	ES	5	4	6	0	0.9983	0.0116	0.0009	0.99993	0.37271	0.458521	NOT
CNN3	3825	RI	1.2	1.1	1.3	0	0.9967	0.1025	0.0081	1.00057	0.52972	0.611211	NOT
RWDD3	3826	AT	5	NA	NA	0	1	0.4015	0.0516	1.00119	0.824	0.86605	NOT
RWDD3	3827	AT	3.3	NA	NA	0	1	0.4015	0.0516	0.99166	0.82406	0.866088	NOT
RWDD3	3828	ES	2	1	3.1	0	0.9702	1	0.1427	1.06709	0.06193	0.0967011	NOT
PTBP2	3829	AP	1	NA	NA	0	0.8612	0.2865	0.0422	0.98053	0	0	DOWN
PTBP2	3830	AP	2	NA	NA	0	0.8612	0.2865	0.0422	2.79524	0	0	UP
PTBP2	3831	AA	16.1	15	16.2	0	0.9537	0.7388	0.1145	0.96046	0.22224	0.297645	NOT
PTBP2	3832	ES	12	11.2	13	0	0.9256	1	0.2262	0.54158	0	0	DOWN
PTBP2	3833	AA	11.1	10	11.2	0	0.8099	0.7206	0.1265	1.41128	0	0	UP
DPYD	3836	AT	25	NA	NA	0	1	0.2272	0.0251	0.99839	0.50178	0.585204	NOT
DPYD	3839	ES	2	1	3	0	0.9851	0.329	0.0232	0.99915	0.62138	0.694406	NOT
SNX7	3840	ES	9	8	10	0	0.9983	0.2985	0.028	1.0053	0.07913	0.120467	NOT
SNX7	3841	ES	5	4	6	0	0.9967	0.0272	0.0028	0.99967	0.20494	0.27764	NOT
SNX7	3842	ES	2	1	3	0	0.9818	0.603	0.0797	1.44752	0	0	UP
PALMD	3846	AT	8	NA	NA	0	1	0.2565	0.0163	0.9931	0	0	DOWN
FRRS1	3848	AD	15.2	15.1	16	0	0.9207	0.2715	0.0311	1.00169	0.69242	0.756839	NOT
AGL	3849	AP	2.1	NA	NA	0	0.9273	0.4852	0.0469	1.47862	0.08231	0.124875	NOT
AGL	3850	AP	5.1	NA	NA	0	0.9273	0.8169	0.0758	6.67143	0	0	UP
AGL	3853	AP	1	NA	NA	0	0.9273	0.8169	0.0943	0.96363	0	0	DOWN
SLC35A3	3858	AP	1	NA	NA	0	0.9835	0.5589	0.103	1.00702	0.55723	0.636843	NOT
SLC35A3	3859	AP	2	NA	NA	0	0.9835	0.5589	0.103	0.96018	0.55724	0.636843	NOT
SLC35A3	3863	ES	08:09:00	7	10.1	0	0.9967	0.1304	0.0167	0.998	0.21506	0.289367	NOT
SLC35A3	3864	ES	3	1	4	0	0.9058	1	0.1407	1.02913	0.39589	0.482223	NOT
TRMT13	3866	AT	8.2	NA	NA	0	1	0.9018	0.0712	1.43953	0	0	UP
TRMT13	3868	AT	10	NA	NA	0	1	0.9018	0.0712	0.9646	0	0	DOWN
TRMT13	3869	RI	6.3	6.2	6.4	0	0.8281	1	0.2325	2.82498	0	0	UP
TRMT13	3870	AA	6.1	5	6.2	0	0.9091	0.6095	0.0928	0.99228	0.5096	0.592401	NOT
TRMT13	3871	ES	5	4	6.1	0	0.9074	0.5753	0.1069	0.94061	0	0	DOWN
DBT	3874	AT	11	NA	NA	0	1	0.1564	0.0199	0.99822	0.25118	0.330376	NOT
DBT	3875	AA	8.1	7	8.2	0	0.9322	0.5914	0.0596	2.98687	0	0	UP
RTCA	3876	AT	12	NA	NA	0	1	0.0764	0.0076	0.9965	0	0	DOWN
RTCA	3878	ES	3	2.1	4	0	0.9752	0.3311	0.0443	1.30625	2e-05	5.27e-05	UP
CDC14A	3879	AP	2	NA	NA	0	0.9157	0.3511	0.0277	0.99628	0.01502	0.0268101	DOWN
CDC14A	3883	AT	18	NA	NA	0	1	0.7926	0.0501	0.98444	8e-05	0.000198597	DOWN
CDC14A	3884	ES	17	16.1	18	0	0.7537	0.2987	0.0426	1.02297	0.8379	0.876565	NOT
CDC14A	3885	ES	9	8	10	0	0.8893	0.3078	0.039	0.98972	0.00194	0.0040249	DOWN
VCAM1	3886	ES	05:06:00	4	7	0	1	0.0076	0.0005	0.9999	0.00058	0.00129462	DOWN
VCAM1	3887	ES	6	4	7	0	0.9207	0.1745	0.0195	0.99612	0.09678	0.144073	NOT
VCAM1	3888	ES	5	4	6	0	0.9967	0.2353	0.0155	0.99651	0.04402	0.0713011	DOWN
VCAM1	3889	AD	2.2	2.1	3	0	0.9967	0.0272	0.0027	1.00039	0.38241	0.468587	NOT
EXTL2	3890	ES	3	2.2	4	0	0.8678	0.4521	0.0431	1.88941	0	0	UP
EXTL2	3891	AA	2.1	1	2.2	0	0.8926	0.8661	0.0958	1.22508	3e-05	7.79e-05	UP
SLC30A7	3892	AT	11.2	NA	NA	0	1	0.3821	0.0734	0.90332	0.00585	0.0112406	DOWN
SLC30A7	3893	AT	12	NA	NA	0	1	0.3821	0.0734	1.02717	0.00585	0.0112406	UP
DPH5	3896	AA	8.1	7	8.2	0	0.9983	0.4289	0.0415	0.9972	0.55467	0.634411	NOT
DPH5	3897	ES	7	6.2	8.1	0	0.9983	0.2263	0.0295	1.01163	0.00171	0.00357371	UP
DPH5	3898	AD	1.2	1.1	2	0	0.9835	0.4536	0.0526	1.09241	0.06735	0.104292	NOT
RNPC3	3907	AA	15.1	14	15.2	0	1	0.9724	0.1938	1.24831	0	0	UP
RNPC3	3908	AA	9.1	8	9.2	0	0.9653	0.623	0.0934	1.00046	0.97687	0.982762	NOT
RNPC3	3909	RI	1.2	1.1	1.3	0	0.9669	0.4264	0.0735	1.02005	0.06371	0.0992399	NOT
AMY2B	3910	ES	10	9	11	0	0.9901	0.2724	0.0407	0.98919	0.05749	0.0905211	NOT
AMY2B	3911	ES	2	1	3	0	0.9868	0.3388	0.0454	1.0137	0.07046	0.108582	NOT
VAV3	3927	AP	1	NA	NA	0	0.9769	1	0.1046	8.30265	0	0	UP
VAV3	3928	AP	18.1	NA	NA	0	0.9769	1	0.1046	0.9424	0	0	DOWN
VAV3	3931	AT	30	NA	NA	0	1	0.1642	0.0175	1.00328	0.04787	0.0769566	UP
VAV3	3934	ES	19	18.2	21	0	0.9719	0.3778	0.0574	1.03254	0	0	UP
SLC25A24	3935	AP	1.1	NA	NA	0	0.995	0.2668	0.014	0.99888	0.20021	0.272071	NOT
SLC25A24	3937	AT	11	NA	NA	0	1	0.1116	0.016	0.99548	0.00398	0.00787047	DOWN
SLC25A24	3939	ES	4	3	5	0	0.9851	0.0488	0.0021	1.00004	0.81949	0.862353	NOT
FAM102B	3940	AT	12	NA	NA	0	1	0.9068	0.1331	1.10046	0.13675	0.195804	NOT
FAM102B	3941	AT	11	NA	NA	0	1	0.9068	0.1331	0.97778	0.13675	0.195804	NOT
HENMT1	3942	AP	1	NA	NA	0	0.8645	1	0.1389	1.02855	0.48061	0.565237	NOT
HENMT1	3943	AP	2	NA	NA	0	0.8645	1	0.1389	0.98221	0.48062	0.565237	NOT
HENMT1	3944	ES	9	8	10	0	0.8413	1	0.0773	1.48766	0.00039	0.000891834	UP
PRPF38B	3945	AT	8	NA	NA	0	1	0.5119	0.0552	0.95778	0	0	DOWN
PRPF38B	3946	AT	6	NA	NA	0	1	0.5119	0.0552	1.74133	0	0	UP
PRPF38B	3947	ES	2	1	3	0	0.9802	0.636	0.0871	1.12152	0.05219	0.083175	NOT
AKNAD1	3952	AT	9.2	NA	NA	0	0.8182	0.8787	0.2162	1.2788	1e-05	2.7e-05	UP
AKNAD1	3953	AT	18	NA	NA	0	0.8182	0.7945	0.1811	0.49137	4e-05	0.000102527	DOWN
AKNAD1	3954	AT	15.4	NA	NA	0	0.8182	0.5267	0.0908	0.56168	0.02499	0.0426364	DOWN
CLCC1	3974	ES	7.2:8:9:10:11:12:13.1	7.1	13.2	0	1	0.0103	0.0006	0.99995	0.05994	0.093955	NOT
CLCC1	3975	ES	6.1:6.2:7.1:7.2	5	8	0	0.9967	0.0877	0.0159	0.99902	0.56578	0.644494	NOT
CLCC1	3977	ES	6.1:6.2:7.1:7.2:8:9	5	10	0	0.9967	0.0451	0.0034	0.99933	0.00182	0.00379088	DOWN
CLCC1	3980	AA	6.1	5	6.2	0	0.9934	0.1614	0.0285	1.00206	0.5418	0.622637	NOT
CLCC1	3981	ES	00:02:03.100000	1	3.2	0	0.9653	0.6098	0.1056	1.0244	0.11739	0.170814	NOT
CLCC1	3982	AA	3.1	1	3.2	0	0.886	0.6211	0.0928	0.97965	0.11843	0.172099	NOT
CLCC1	3983	ES	2	1	3.1	0	0.9686	0.8761	0.1191	1.18616	0	0	UP
WDR47	3984	AA	6.1	5	6.2	0	0.8579	0.7635	0.085	0.96202	0.52852	0.610029	NOT
WDR47	3986	ES	3	2	4.1	0	0.9074	0.1481	0.0133	0.99855	0.18795	0.257622	NOT
TAF13	3987	AT	5	NA	NA	0	1	0.635	0.0997	1.08194	0	0	UP
TAF13	3988	AT	4.2	NA	NA	0	1	0.635	0.0997	0.91207	0	0	DOWN
SORT1	4008	AP	1	NA	NA	0	0.9388	0.6178	0.0702	0.94697	0	0	DOWN
SORT1	4009	AP	2	NA	NA	0	0.9388	0.6178	0.0702	2.35369	0	0	UP
SORT1	4010	AA	9.1	8	9.2	0	0.9636	0.6994	0.0716	0.97982	0.01205	0.0219161	DOWN
PSMA5	4011	ES	2	1	3	0	1	0.0357	0.0054	1.00514	0	0	UP
SYPL2	4012	ES	5	4	6	0	0.9157	0.5071	0.0625	1.03113	2e-05	5.27e-05	UP
ATXN7L2	4013	AA	6.1	5	6.2	0	0.9273	0.226	0.0168	0.99776	0.00552	0.0106575	DOWN
CYB561D1	4016	AT	4.3	NA	NA	0	1	0.0972	0.0113	0.99577	0	0	DOWN
CYB561D1	4017	AA	4.1	3	4.2	0	0.7719	0.7921	0.1052	1.2676	0.00016	0.000384843	UP
CYB561D1	4023	ES	02:03:00	1.2	4.2	0	0.8331	0.4588	0.0625	0.98731	0.02243	0.0386196	DOWN
CYB561D1	4026	ES	2	1.2	3	0	0.8446	1	0.1434	0.96368	0.08844	0.133079	NOT
CYB561D1	4027	ES	1.2:2	1.1	3	0	0.8545	0.6976	0.1228	1.02564	0.16245	0.227408	NOT
CYB561D1	4032	ES	1.2:2:3	1.1	4.2	0	0.8463	0.2603	0.0319	1.00394	0.4197	0.505282	NOT
CYB561D1	4033	ES	1.2:3	1.1	4.2	0	0.7504	0.2833	0.0414	1.00618	0.37324	0.459112	NOT
AMPD2	4043	AP	3	NA	NA	0	0.9917	0.3422	0.0497	2.06948	0	0	UP
AMPD2	4046	AP	2.1	NA	NA	0	0.9917	0.2468	0.0384	0.82003	0.00052	0.00116929	DOWN
AMPD2	4047	AP	1	NA	NA	0	0.9917	0.8198	0.0924	0.95257	0	0	DOWN
AMPD2	4049	ES	2.2	1	4	0	0.9008	1	0.1221	1.02484	0.79197	0.840376	NOT
GSTM4	4050	AT	5.3	NA	NA	0	1	0.6002	0.0645	0.97169	0.00019	0.000453034	DOWN
GSTM4	4051	AT	6	NA	NA	0	1	0.6002	0.0645	1.1018	0.00019	0.000453034	UP
GSTM4	4052	RI	5.2	5.1	5.3	0	0.9967	0.6081	0.0406	2.13531	0	0	UP
GSTM4	4053	ES	2.4:2.5:3	2.3	4	0	0.8826	0.9506	0.0619	1.01598	0.16	0.224492	NOT
GSTM4	4054	ES	2.5:3	2.3	4	0	1	0.5428	0.0221	0.99892	0.29101	0.374485	NOT
GSTM2	4061	AT	9	NA	NA	0	1	0.8198	0.0525	0.97351	0	0	DOWN
GSTM2	4062	ES	7	6	9	0	0.9983	0.022	0.0015	0.99984	0.15782	0.221925	NOT
GSTM2	4063	AD	2.2	2.1	3	0	0.9967	0.0374	0.0037	0.99964	0.20543	0.278223	NOT
GSTM1	4064	AT	8	NA	NA	0	1	0.4276	0.0215	1.00532	0.02677	0.0454347	UP
GSTM1	4066	ES	7	6	8	0	0.9868	0.1428	0.0288	0.99476	0.14255	0.20305	NOT
GSTM1	4067	ES	06:07:00	5	8	0	0.9868	0.0897	0.0079	0.99841	0.05784	0.0909955	NOT
GSTM1	4069	ES	4.1:4.2	3	5	0	0.8033	0.8556	0.1356	2.24009	0	0	UP
GSTM1	4070	ES	4.2	3	5	0	0.9835	0.9298	0.3001	1.08098	0.15562	0.219277	NOT
CSF1	4082	AT	10	NA	NA	0	1	0.4844	0.0387	0.9725	0	0	DOWN
CSF1	4084	AT	9	NA	NA	0	1	0.4844	0.0387	1.38976	0	0	UP
CSF1	4085	RI	6.2	6.1	6.3	0	0.995	0.0599	0.0057	1.00425	0.00183	0.00381065	UP
CSF1	4086	AA	6.1:6.2	5	6.3	0	0.9967	0.5688	0.0617	1.03705	0.00045	0.00102067	UP
CSF1	4087	ES	6.1	5	6.3	0	0.8612	0.5317	0.0902	0.47573	0.01143	0.0208718	DOWN
AHCYL1	4088	AP	2.1	NA	NA	0	0.9967	0.6703	0.1176	1.44863	0	0	UP
AHCYL1	4089	AP	1	NA	NA	0	0.9967	0.6703	0.1176	0.9417	0	0	DOWN
STRIP1	4092	AP	2	NA	NA	0	0.9008	1	0.0541	0.99769	0.47449	0.559401	NOT
KCNC4	4096	RI	4.2:4.3	4.1	4.4	0	0.995	0.2295	0.0371	0.9972	0.43213	0.517893	NOT
KCNC4	4097	AA	4.1:4.2	3	4.3	0	0.9967	0.0816	0.0092	0.99873	0.16194	0.226813	NOT
KCNC4	4098	AA	4.1:4.2:4.3	3	4.4	0	0.9967	0.5246	0.0817	0.97438	0.00435	0.00854426	DOWN
KCNC4	4100	ES	4.1	3	4.4	0	0.8413	1	0.1997	1.02896	0.68378	0.749324	NOT
RBM15	4101	AT	1.2	NA	NA	0	1	0.507	0.1114	0.78193	0	0	DOWN
RBM15	4102	AT	3	NA	NA	0	1	0.507	0.1114	1.07535	0	0	UP
RBM15	4103	ES	2	1.1	3	0	0.9934	0.5856	0.0934	1.06237	0.00049	0.00110556	UP
SLC16A4	4105	ES	6	5	7	0	0.9983	0.2925	0.0402	0.97694	0	0	DOWN
SLC16A4	4106	ES	4	3	5	0	0.9884	0.1512	0.02	0.99243	1e-05	2.7e-05	DOWN
SLC16A4	4108	ES	03:04:00	2	5	0	0.9917	0.2427	0.0218	0.99315	7e-05	0.000174782	DOWN
SLC16A4	4109	ES	4	2	5	0	0.9603	0.8403	0.0899	0.95292	0	0	DOWN
SLC16A4	4110	ES	3	2	5	0	0.8645	1	0.1629	1.04184	0.18941	0.259309	NOT
SLC16A4	4111	ES	3	2	4	0	0.9884	0.535	0.0572	1.01358	0.03049	0.0511053	UP
LAMTOR5	4113	AP	1.1	NA	NA	0	1	0.3956	0.0262	0.98257	0	0	DOWN
LAMTOR5	4114	RI	1.2	1.1	1.3	0	0.9934	0.7323	0.145	0.94276	0.02024	0.035147	DOWN
CD53	4125	ES	05:06:00	4	7	0	0.9983	0.046	0.0041	1.00128	0.09469	0.141316	NOT
LRIF1	4126	AP	1	NA	NA	0	0.9967	0.4177	0.0428	0.98253	0	0	DOWN
LRIF1	4128	AD	2.3	2.2	3	0	0.9967	0.4074	0.0395	0.99147	0.01205	0.0219161	DOWN
LRIF1	4129	ES	2.2:2.3	1	3	0	0.9851	0.9088	0.1282	0.93201	3e-05	7.79e-05	DOWN
LRIF1	4130	ES	2.2	1	3	0	0.7537	1	0.1414	1.33513	0.11087	0.162395	NOT
DRAM2	4133	ME	5|6	4	7	0	0.9983	0.1313	0.0095	1.00262	0.00575	0.0110724	UP
DRAM2	4136	AD	1.3	1.2	2	0	0.9967	1	0.2783	1.01436	0.76665	0.818996	NOT
DRAM2	4137	AD	1.2:1.3	1.1	2	0	0.9967	1	0.1049	0.98492	0.14787	0.209781	NOT
CEPT1	4139	AP	2	NA	NA	0	0.9785	0.6796	0.0714	0.97156	0.00072	0.00158655	DOWN
CEPT1	4140	AP	1	NA	NA	0	0.9785	0.6796	0.0714	1.13172	0.00072	0.00158655	UP
DENND2D	4141	AP	2	NA	NA	0	0.9934	0.9254	0.2158	3.0524	0	0	UP
DENND2D	4142	AP	1	NA	NA	0	0.9934	0.9254	0.2158	0.55462	0	0	DOWN
CHI3L2	4144	AP	4.1	NA	NA	0	0.7669	0.9277	0.2292	2.90179	0	0	UP
CHI3L2	4145	AP	3.1	NA	NA	0	0.7669	0.7389	0.1568	1.38618	0.2862	0.369338	NOT
CHI3L2	4146	AP	1	NA	NA	0	0.7669	1	0.2618	0.73183	0	0	DOWN
CHI3L2	4147	AT	13	NA	NA	0	0.843	0.1094	0.0092	0.99989	0.95254	0.965618	NOT
PIFO	4162	ES	3	2	4	0	0.9901	0.5477	0.1028	1.00755	0.57986	0.657306	NOT
OVGP1	4165	ES	07:08:00	6	9	0	0.9322	0.5126	0.0651	1.00165	0.85985	0.894565	NOT
WDR77	4166	ES	03:04:00	2	5	0	0.9983	0.0314	0.0034	1.00076	0.1059	0.155996	NOT
ATP5F1	4167	ES	02:03:00	1	4	0	1	0.0075	0.001	0.99967	4e-05	0.000102527	DOWN
C1orf162	4168	ES	5.1:5.2	4	6	1	0.8678	0.5517	0.0872	1.18887	0	0	UP
C1orf162	4169	ES	5.2	4	6	1	0.8678	0.3148	0.0385	1.07118	0	0	UP
C1orf162	4170	AA	5.1	4	5.2	0	0.9868	0.9192	0.0907	0.99247	0.88099	0.910729	NOT
ADORA3	4172	AP	2	NA	NA	0	0.9702	0.1485	0.0087	0.9995	0.60261	0.678068	NOT
ADORA3	4174	AT	3	NA	NA	0	1	0.9113	0.148	1.10689	0.00186	0.00386859	UP
ADORA3	4175	AT	8	NA	NA	0	1	0.9113	0.148	0.78736	0.00186	0.00386859	DOWN
RAP1A	4176	AP	3	NA	NA	0	0.9769	0.6913	0.0986	1.03109	0.56551	0.644265	NOT
RAP1A	4178	AP	2	NA	NA	0	0.9769	0.721	0.1024	1.00675	0.56634	0.644935	NOT
RAP1A	4179	ES	4	2	5	0	0.9851	0.8087	0.1005	0.99021	0.78726	0.836207	NOT
FAM212B	4180	AP	2	NA	NA	0	0.9421	0.427	0.0683	1.041	0.00066	0.00146132	UP
FAM212B	4181	AP	1	NA	NA	0	0.9421	0.427	0.0683	0.67707	0.00066	0.00146132	DOWN
DDX20	4188	RI	5.1	5.9	5.11	0	0.9818	0.4163	0.0743	3.95314	0	0	UP
DDX20	4189	RI	5.8	5.7	5.9	0	0.9719	1	0.1694	2.89983	0	0	UP
DDX20	4190	RI	5.6	5.5	5.7	0	0.9868	1	0.1331	2.80105	0	0	UP
DDX20	4191	RI	5.4	5.3	5.5	0	0.9289	1	0.1074	2.88745	0	0	UP
DDX20	4192	RI	5.2	5.1	5.3	0	0.9388	0.8649	0.0973	2.70702	0	0	UP
DDX20	4193	ES	3	2	4.2	0	0.9851	0.0444	0.0079	1.0013	0.28974	0.373056	NOT
WNT2B	4198	AP	1	NA	NA	0	0.9884	0.9722	0.2574	1.18965	2e-05	5.27e-05	UP
WNT2B	4199	AP	3	NA	NA	0	0.9884	0.9722	0.2574	0.61883	2e-05	5.27e-05	DOWN
ST7L	4205	AT	18	NA	NA	0	1	0.7202	0.089	1.0082	0.48672	0.570937	NOT
ST7L	4207	AT	16.2	NA	NA	0	1	0.7202	0.089	0.96531	0.48671	0.570937	NOT
ST7L	4209	ES	17	16.1	18	0	0.9802	1	0.2342	1.17776	0.03123	0.0522402	UP
ST7L	4210	ES	15	14	16.1	0	0.9917	0.6543	0.0931	0.954	3e-05	7.79e-05	DOWN
ST7L	4212	ES	14	13	15	0	0.9851	0.267	0.0417	0.99116	0.03125	0.0522689	DOWN
ST7L	4213	ES	07:08:00	6	9	0	0.9818	0.2805	0.0229	1.00943	0.01257	0.0227798	UP
ST7L	4214	ES	6	5	7	0	0.9636	0.3747	0.0489	0.98902	0.00912	0.0169249	DOWN
ST7L	4216	AA	4.1	2.2	4.2	0	0.9917	0.3292	0.0354	0.99133	0.00273	0.00553391	DOWN
ST7L	4220	AD	2.3	2.2	4.1	0	0.9521	1	0.0656	3.72816	0	0	UP
MOV10	4221	AP	1	NA	NA	0	0.9504	0.6811	0.1242	1.0765	0.00075	0.0016477	UP
MOV10	4222	AP	2.1	NA	NA	0	0.9504	0.6811	0.1242	0.81415	0.00075	0.0016477	DOWN
MOV10	4225	ES	00:03:04.100000	2.3	4.2	0	0.9901	0.5349	0.0664	1.36117	0	0	UP
MOV10	4226	AA	2.2	1	2.3	0	0.9041	1	0.1144	0.88921	0.0047	0.00919114	DOWN
RHOC	4231	ES	6.2:7.1	6.1	7.2	0	1	0.0266	0.0027	1.00048	0.12889	0.185724	NOT
RHOC	4235	AA	2.1:2.2	1.1	2.3	0	0.9967	0.9479	0.1881	1.47872	0	0	UP
RHOC	4236	ES	1.2:1.3:2.2	1.1	2.3	0	0.9686	0.7165	0.1299	1.23016	0.00111	0.00238255	UP
RHOC	4237	ES	1.2:2.2	1.1	2.3	0	0.9388	0.4166	0.0827	0.56928	0.00021	0.000497957	DOWN
RHOC	4238	AA	2.2	1.1	2.3	0	0.9967	0.0982	0.0147	0.99073	0	0	DOWN
RHOC	4244	ES	2.1:2.2:2.3	1.1	3	0	0.9983	0.54	0.0435	2.30007	0	0	UP
RHOC	4247	ES	2.2:2.3	1.1	3	0	1	1	0.0912	0.93499	1e-05	2.7e-05	DOWN
RHOC	4248	ES	2.3	1.1	3	0	0.9983	0.3183	0.0279	1.07102	0.11288	0.165003	NOT
RHOC	4249	AA	2.1	1.1	2.2	0	0.9967	0.9971	0.0584	2.71095	0	0	UP
SLC16A1	4265	AT	5.2	NA	NA	0	1	0.9341	0.1082	0.67036	0	0	DOWN
SLC16A1	4266	AT	6	NA	NA	0	1	0.9341	0.1082	1.1238	0	0	UP
MAGI3	4270	AT	22.2	NA	NA	0	1	0.7697	0.0499	6.29901	0	0	UP
MAGI3	4271	AT	23	NA	NA	0	1	0.7697	0.0499	0.97814	0	0	DOWN
MAGI3	4273	ES	8	7	9	0	0.8149	0.9377	0.2598	2.61358	0	0	UP
PHTF1	4277	AT	18	NA	NA	0	1	0.3069	0.0304	1.01181	0.00086	0.00187689	UP
PHTF1	4279	ES	7	6	8	0	0.9934	0.293	0.0326	0.99042	0.00753	0.0141834	DOWN
PHTF1	4281	ES	6	5	7	0	0.9884	0.1566	0.0203	0.9958	0.01694	0.0299312	DOWN
PHTF1	4282	ES	4	3	5	0	0.9884	0.1131	0.0094	1.00019	0.85196	0.888066	NOT
PHTF1	4284	RI	1.2:1.3	1.1	1.4	0	0.9273	0.7796	0.1642	1.05043	0.10085	0.149405	NOT
PTPN22	4286	AT	22	NA	NA	0	0.9851	0.5535	0.0525	0.99547	0.71697	0.777247	NOT
PTPN22	4288	AT	21.2	NA	NA	0	0.9851	0.5535	0.0525	1.11535	0.71696	0.777247	NOT
PTPN22	4289	ES	11:12:00	10	13	0	0.7884	0.2025	0.0198	0.996	4e-05	0.000102527	DOWN
PTPN22	4290	ES	9:10:11:12:13:14:15:16:17:18:19:20	8	21.1	0	0.9587	0.0473	0.0033	0.99971	0.05237	0.0833978	NOT
PTPN22	4293	ES	6:7:8:9:10	5	11	0	0.7868	0.0934	0.0058	0.99954	0.10337	0.152673	NOT
AP4B1	4304	AT	5.2	NA	NA	0	1	0.8287	0.0576	2.79557	0	0	UP
AP4B1	4305	AT	10	NA	NA	0	1	0.8287	0.0576	0.9574	0	0	DOWN
AP4B1	4306	ES	03:04:00	2	5.1	0	0.9934	0.1299	0.0211	1.00299	0.27759	0.359943	NOT
AP4B1	4307	ES	02:03:04	1.3	5.1	0	0.995	0.1288	0.0166	0.99863	0.44	0.52569	NOT
AP4B1	4309	RI	1.2	1.1	1.3	0	0.8347	0.9125	0.1757	1.26977	0	0	UP
HIPK1	4310	AP	1	NA	NA	0	0.9091	0.6623	0.0846	1.01509	0.89163	0.918932	NOT
HIPK1	4311	AP	2	NA	NA	0	0.9091	0.8508	0.1067	0.9771	0.00957	0.0176976	DOWN
HIPK1	4316	AT	19	NA	NA	0	1	0.074	0.0107	0.99327	0	0	DOWN
HIPK1	4317	ES	13	12	14	0	0.9736	0.144	0.0127	1.0014	0.19135	0.26162	NOT
HIPK1	4318	AD	10.2	10.1	11	0	0.9669	0.1609	0.0301	1.00404	0.18676	0.256207	NOT
TRIM33	4324	ES	20	19	21	0	0.9983	0.8404	0.0883	1.09555	1e-05	2.7e-05	UP
TRIM33	4325	ES	12	11	13	0	0.8562	0.8178	0.1197	0.88317	0.00142	0.00300021	DOWN
CSDE1	4333	ES	6	5	7	0	0.9967	0.818	0.0469	1.0914	5e-05	0.00012694	UP
CSDE1	4334	ES	03:04:00	2	5	0	0.9091	1	0.1742	0.93487	0.10137	0.150039	NOT
CSDE1	4335	ES	4	2	5	0	0.9983	0.0302	0.0044	0.99936	0.13358	0.19175	NOT
CSDE1	4338	ES	02:03:00	1	4	0	0.8579	1	0.1988	1.09022	0.14424	0.205168	NOT
CSDE1	4339	ES	2	1	4	0	0.9983	0.041	0.0065	1.00249	0.00151	0.003181	UP
SIKE1	4340	ES	1.2:2	1.1	3	1	0.7752	0.9254	0.1458	0.86087	0	0	DOWN
SIKE1	4341	ES	2	1.1	3	1	0.7983	0.4215	0.0538	0.9685	0	0	DOWN
SIKE1	4342	AD	1.2	1.1	2	0	0.9917	0.5412	0.0812	0.91531	0.10931	0.160343	NOT
TSPAN2	4345	ES	7	6	8	0	0.9455	0.2274	0.0386	0.98841	0.00057	0.00127367	DOWN
TSPAN2	4346	ES	4	3	5	0	0.9157	0.2059	0.0221	1.00986	0.00026	0.000608752	UP
VANGL1	4350	AD	4.2	4.1	5	0	0.8397	0.0757	0.0034	0.99983	0.31787	0.40167	NOT
CASQ2	4351	ES	03:04:00	2	5	0	0.9107	0.3019	0.0235	1.00014	0.95611	0.968055	NOT
SLC22A15	4354	AT	12	NA	NA	0	0.9983	0.4379	0.0733	0.95957	0	0	DOWN
SLC22A15	4355	AT	6.3	NA	NA	0	0.9983	0.4379	0.0733	1.74827	0	0	UP
ATP1A1	4359	AP	1	NA	NA	0	1	0.548	0.0383	0.96006	0	0	DOWN
CD58	4360	AT	5.3	NA	NA	0	1	0.4009	0.056	2.42178	0	0	UP
CD58	4361	AT	6	NA	NA	0	1	0.5222	0.0672	0.97443	6e-05	0.000151106	DOWN
CD58	4362	AT	4.2	NA	NA	0	1	0.2593	0.0393	0.81955	0	0	DOWN
CD58	4363	AA	5.1	4.1	5.2	0	0.995	0.2743	0.0406	1.33031	2e-05	5.27e-05	UP
IGSF3	4366	ES	6	5	7	0	0.8149	0.7385	0.1484	0.56986	0	0	DOWN
CD2	4367	AT	5	NA	NA	0	0.9967	0.0489	0.0047	0.99815	0	0	DOWN
TRIM45	4370	AP	2.1	NA	NA	0	0.9835	0.7198	0.0339	0.99755	0.22046	0.29559	NOT
TRIM45	4372	AD	3.2	3.1	4	0	0.8182	0.3731	0.0656	1.00616	0.46754	0.55255	NOT
GDAP2	4377	AT	14	NA	NA	0	1	0.8209	0.09	1.09667	0	0	UP
GDAP2	4378	AT	13.2	NA	NA	0	1	0.8209	0.09	0.79728	0	0	DOWN
WARS2	4383	AP	1	NA	NA	0	0.9868	0.2087	0.0385	0.99849	0.70966	0.771193	NOT
WARS2	4384	AP	2	NA	NA	0	0.9868	0.2087	0.0385	1.03063	0.70966	0.771193	NOT
WARS2	4385	AA	7.1	6	7.2	0	0.9785	0.4674	0.0663	1.04789	0.35578	0.441238	NOT
PHGDH	4390	AP	1	NA	NA	0	0.9901	0.0428	0.0032	0.9993	0	0	DOWN
HMGCS2	4391	ES	3	2	4	0	0.7785	0.0153	0.0008	1.00006	0.31801	0.401744	NOT
NOTCH2	4398	AP	1	NA	NA	0	0.9884	0.3147	0.0163	0.99809	0.03385	0.0561826	DOWN
NOTCH2	4400	AT	7	NA	NA	0	1	0.4872	0.0457	0.60302	0	0	DOWN
NOTCH2	4401	AT	37	NA	NA	0	1	0.4872	0.0457	1.05774	0	0	UP
FCGR1B	4403	ES	02:03:00	1	4	0	0.9851	0.4167	0.0802	0.95769	0.00191	0.00396574	DOWN
PDE4DIP	4405	AP	8.1	NA	NA	0	0.9967	0.8458	0.0727	0.54433	0	0	DOWN
PDE4DIP	4407	AP	3	NA	NA	0	0.9967	0.8829	0.1434	1.17982	0	0	UP
PDE4DIP	4408	AP	13.1	NA	NA	0	0.9967	0.6446	0.1231	0.63781	0	0	DOWN
PDE4DIP	4410	AT	11.2	NA	NA	0	1	0.626	0.0853	0.86957	0.01368	0.0246313	DOWN
PDE4DIP	4411	AT	29.2	NA	NA	0	1	0.8463	0.1269	0.90174	0.0002	0.000475301	DOWN
PDE4DIP	4412	AT	30.3	NA	NA	0	1	0.2625	0.0354	1.0548	0.13806	0.197483	NOT
PDE4DIP	4418	AT	52.2	NA	NA	0	1	0.559	0.0988	1.22638	0	0	UP
PDE4DIP	4419	AA	52.1	51	52.2	0	0.9818	0.3763	0.0623	1.06042	0	0	UP
PDE4DIP	4424	AD	32.2	32.1	33	0	0.9818	0.7401	0.1204	1.12268	0	0	UP
PDE4DIP	4425	RI	30.2	30.1	30.3	0	0.9504	0.5488	0.1155	1.13542	0	0	UP
PDE4DIP	4426	AD	13.2	13.1	14	0	0.9983	0.6352	0.0336	1.02786	0	0	UP
PDE4DIP	4427	ES	9	8.3	10	0	0.9818	0.3338	0.043	0.99373	0.08821	0.132775	NOT
PDE4DIP	4431	ES	5.1:5.2:5.3	4	6.1	0	0.9207	0.7021	0.0925	1.81224	0	0	UP
PDE4DIP	4432	ES	5.2:5.3	4	6.1	0	0.9322	0.7064	0.1009	2.02072	0	0	UP
NOTCH2NL	4435	AP	1	NA	NA	0	0.9901	0.5593	0.0264	0.99626	0.01396	0.0250967	DOWN
NOTCH2NL	4437	AT	7	NA	NA	0	1	0.7246	0.1486	0.83009	0	0	DOWN
NOTCH2NL	4438	AT	9	NA	NA	0	1	0.7246	0.1486	1.35932	0	0	UP
NBPF10	4439	AP	1	NA	NA	0	0.9967	0.7487	0.1011	1.00716	0.88655	0.915135	NOT
NBPF10	4441	AP	3.1	NA	NA	0	0.9967	0.7487	0.1011	0.99819	0.88653	0.915135	NOT
NBPF10	4446	ES	85:86:87:88	84	89	0	0.995	0.8128	0.0677	1.01292	0.4438	0.529446	NOT
NBPF10	4448	ES	84:85:86:87	83	88	0	0.962	0.6397	0.1118	0.99398	0.6991	0.762556	NOT
NBPF10	4449	ES	79:80	78	81	0	0.9884	0.5763	0.1218	1.02029	0.2751	0.357049	NOT
NBPF10	4452	ES	72:73:74:75:76:77	71	78	0	0.9851	0.5735	0.1167	1.00115	0.94622	0.961036	NOT
NBPF10	5338	ES	1 day, 5:30:00	28	31.1	0	0.7802	0.6967	0.1743	0.93572	0.00847	0.0157947	DOWN
NBPF10	5531	ES	17:18:00	16	19	0	0.995	0.6724	0.0946	0.99663	0.8493	0.885986	NOT
NBPF10	7266	AD	15.2	15.1	16	0	0.9917	0.0425	0.0018	0.9999	0.22762	0.303816	NOT
NBPF10	7267	ES	5:6:7:8:9	4.2	10	0	0.9983	0.5322	0.0483	1.00241	0.68261	0.748316	NOT
NBPF10	7268	ES	6:7:8:9	4.2	10	0	0.8165	1	0.199	1.6839	0	0	UP
NBPF10	7269	ES	5	4.2	6	0	0.9901	0.2367	0.0351	0.97133	0	0	DOWN
NBPF10	7270	ES	3.2:4.1:4.2:5:6:7:8	3.1	9	0	0.9901	0.517	0.0359	1.01767	1e-05	2.7e-05	UP
NBPF10	7271	ES	3.2:4.1:4.2:6:7:8	3.1	9	0	0.7719	0.8189	0.1864	1.35381	0	0	UP
POLR3GL	7278	ES	4	3	5	0	0.9967	0.0645	0.012	1.00117	0.40717	0.492781	NOT
RBM8A	7279	AA	3.1	2	3.2	0	1	0.174	0.0225	0.99528	0.09008	0.135263	NOT
PEX11B	7280	AP	1	NA	NA	0	0.9884	0.1484	0.0164	0.99549	0.00283	0.00572327	DOWN
PIAS3	7288	AP	1	NA	NA	0	0.9818	1	0.0996	1.11846	0	0	UP
PIAS3	7289	AP	2	NA	NA	0	0.9818	1	0.0996	0.80811	0	0	DOWN
PIAS3	7291	AT	14	NA	NA	0	1	0.0945	0.017	0.98942	0	0	DOWN
PIAS3	7292	RI	7.2	7.1	7.3	0	0.9769	1	0.1121	3.17744	0	0	UP
POLR3C	7294	ES	12:13:14	11	15	0	1	0.0523	0.0061	0.99931	0.33303	0.417318	NOT
RNF115	7297	ES	3	2	4	0	0.9769	0.3034	0.0388	0.86346	0.03245	0.0540751	DOWN
CD160	7300	RI	5.2	5.1	5.3	0	0.9554	0.9925	0.3136	0.59937	0	0	DOWN
CD160	7301	ES	4	3.3	5.1	0	0.8579	0.5026	0.1044	0.95849	0.0076	0.0143052	DOWN
PDZK1	7303	AP	1	NA	NA	0	0.9835	1	0.1259	0.93857	0	0	DOWN
PDZK1	7304	AP	2	NA	NA	0	0.9835	1	0.1259	1.52257	0	0	UP
PDZK1	7305	ES	05:06:00	4	7	0	0.9983	0.02	0.0012	0.99989	0.12385	0.179167	NOT
GPR89A	7311	ES	8	7.2	9	0	0.9967	0.2046	0.0116	1.00348	0.28172	0.364489	NOT
GPR89A	7312	AA	7.1	6	7.2	0	0.9901	0.7667	0.099	1.05918	0.2305	0.307155	NOT
GPR89A	7316	ES	4	1	5	0	0.9901	0.1789	0.0253	0.99838	0.57527	0.653034	NOT
GPR89A	7317	ES	3	1	4	0	0.9736	0.5591	0.0978	0.51413	0	0	DOWN
GPR89A	7318	ES	2	1	4	0	0.9752	0.3252	0.039	1.38885	0.00287	0.00579977	UP
NBPF11	7326	ES	25.1:25.2:25.3	24	26	0	0.9686	0.0706	0.004	1.00051	0.49542	0.579287	NOT
NBPF11	7328	ES	21:22:00	20.2	23	0	0.9884	0.4263	0.0821	1.02692	0.05377	0.0853435	NOT
NBPF11	7329	AA	20.1	19.2	20.2	0	0.8826	0.7897	0.1431	1.4447	0	0	UP
NBPF11	7331	AD	19.2	19.1	20.2	0	0.9669	0.4671	0.0901	1.0548	0.00152	0.00319954	UP
NBPF11	7333	ES	19.1:19.2	18	20.2	0	0.9653	0.3608	0.054	0.95828	0	0	DOWN
NBPF11	7336	ES	9:10:11:12:13	8.3	14	0	0.9884	0.5537	0.0553	0.9664	0	0	DOWN
NBPF11	7337	ES	10:11:12:13	8.3	14	0	0.8149	0.784	0.13	1.13199	0.00951	0.0175954	UP
NBPF11	7338	ES	9	8.3	10	0	0.8893	0.5422	0.1055	0.84404	0	0	DOWN
NBPF11	7339	RI	8.2	8.1	8.3	0	0.9421	1	0.2366	2.55782	0	0	UP
NBPF11	7340	ES	5:8.1:8.2	4	8.3	0	0.7719	1	0.273	2.42817	0	0	UP
NBPF11	7342	ES	00:05:08.100000	4	8.3	0	0.914	0.8278	0.1619	1.22863	0	0	UP
NBPF11	7343	ES	8.1	4	8.3	0	0.8215	0.8397	0.1933	1.35856	0	0	UP
NBPF11	7344	ES	06:07:00	4	8.3	0	0.9471	1	0.2272	1.73393	0	0	UP
NBPF11	7345	ES	5	4	8.1	0	0.9223	1	0.1619	0.9184	0.01227	0.0222782	DOWN
NBPF11	7346	ES	3	2	4	0	0.9868	0.4416	0.0541	1.03732	3e-05	7.79e-05	UP
NBPF12	7351	ES	67:68:69:70:71:72:73:74:75:76:77:78:79:80:81:82:83:84	66	85	0	0.9934	0.333	0.0562	0.65055	0	0	DOWN
NBPF12	7354	ES	29:30:31:32:33:34:35:36:37:38:39:40:41:42:43:44:45:46:47:48:49:50:51:52:53:54:55:56	28	57	0	0.995	0.7038	0.1486	1.07148	0.01262	0.0228671	UP
NBPF12	7355	ES	24.3:25	24.2	26	0	0.924	0.6002	0.0928	3.11227	0	0	UP
NBPF12	7357	AD	24.2	24.1	26	0	0.9669	0.4393	0.0858	0.99216	0.47064	0.555493	NOT
NBPF12	7358	RI	22.2	22.1	22.3	0	0.8397	0.1553	0.0225	0.99796	0.49267	0.576703	NOT
NBPF12	7359	ES	12.2:13:14:15:16:17.1	12.1	17.2	0	0.995	0.7131	0.0798	0.95909	0.00231	0.00473703	DOWN
NBPF12	7360	ES	9	8	10	0	0.9388	0.5422	0.0985	0.88083	0	0	DOWN
NBPF12	7361	ES	6	5	7	0	0.9736	0.8027	0.129	1.16653	0	0	UP
NBPF12	7362	ES	4	3	5	0	0.9851	0.4416	0.055	1.03667	1e-05	2.7e-05	UP
PRKAB2	7364	ES	3	2	4	0	0.9372	0.5846	0.0765	1.00734	0.35169	0.436963	NOT
FMO5	7365	AP	1	NA	NA	0	0.7917	0.9204	0.0959	2.47108	0	0	UP
FMO5	7366	AP	2.1	NA	NA	0	0.7917	0.9204	0.0959	0.97032	0	0	DOWN
FMO5	7367	AT	11	NA	NA	0	1	0.7583	0.1513	3.52134	0	0	UP
FMO5	7368	AT	10	NA	NA	0	1	0.7447	0.1278	0.90168	0.00015	0.000362025	DOWN
FMO5	7369	AT	9	NA	NA	0	1	0.6024	0.115	0.74203	0	0	DOWN
FMO5	7370	AA	7.1	6	7.2	0	0.8479	0.2558	0.0208	0.99753	0.05109	0.0816134	NOT
FMO5	7371	ES	7.1:7.2	6	8	0	0.9405	0.6238	0.0921	0.9547	0	0	DOWN
CHD1L	7376	ES	10:11:12	9	13	0	0.9983	0.0597	0.0051	1.00015	0.77711	0.827781	NOT
CHD1L	7377	ES	7	6	8	0	0.995	0.0754	0.0069	1.00063	0.48578	0.570085	NOT
CHD1L	7378	ES	2:3:4:5	1	6	0	0.995	0.2435	0.0161	0.99735	0.02778	0.0469633	DOWN
CHD1L	7379	ES	2:3:4:5:6:7	1	8	0	0.9967	0.1422	0.0152	0.99659	0.0028	0.0056672	DOWN
ACP6	7383	AT	7	NA	NA	0	1	0.6925	0.1532	1.09449	0.18332	0.252173	NOT
ACP6	7384	AT	11	NA	NA	0	1	0.6925	0.1532	0.96695	0.18332	0.252173	NOT
GJA5	7386	AP	1	NA	NA	0	0.9537	0.5455	0.0448	1.00285	0.45645	0.541774	NOT
NBPF15	7397	ES	04:05:00	3	6	0	0.9917	1	0.1469	1.43195	0	0	UP
HIST2H2BF	7398	AT	3	NA	NA	0	0.9934	0.3816	0.0514	1.35848	0	0	UP
HIST2H2BF	7399	AT	2	NA	NA	0	0.9934	0.6063	0.0904	1.04107	0.5124	0.595082	NOT
HIST2H2BF	7400	AT	1.2	NA	NA	0	0.9934	0.8517	0.1126	0.9623	0.0022	0.00452711	DOWN
BOLA1	7408	ES	2.2:3.1	2.1	3.2	0	0.9521	1	0.1981	1.1151	0.02131	0.0368543	UP
SV2A	7410	AT	12.2	NA	NA	0	1	0.8642	0.1767	1.44077	0	0	UP
SV2A	7411	AT	13	NA	NA	0	1	0.8642	0.1767	0.77281	0	0	DOWN
MTMR11	7412	AP	1	NA	NA	0	0.9868	0.9084	0.1917	0.76887	2e-05	5.27e-05	DOWN
MTMR11	7413	AP	2.1	NA	NA	0	0.9868	0.9084	0.1917	1.30201	2e-05	5.27e-05	UP
MTMR11	7414	RI	17.2	17.1	17.3	0	0.9983	0.1322	0.0126	1.00137	0.51175	0.594401	NOT
MTMR11	7415	ES	13	12	14	0	0.9884	0.1866	0.0217	0.98723	0	0	DOWN
MTMR11	7416	ES	8:9:10:11:12:13	7	14	0	0.9901	0.0394	0.0056	0.99891	0.07013	0.108113	NOT
MTMR11	7418	AA	3.1	2.2	3.2	0	0.9818	0.1613	0.028	1.01331	0.00894	0.0166173	UP
VPS45	7421	ES	16	15	17	0	1	1	0.0841	2.18728	0	0	UP
VPS45	7423	ES	05:06:00	4	7	0	0.9967	0.3238	0.0157	0.99881	0.21685	0.291419	NOT
VPS45	7424	AD	1.2	1.1	2	0	0.9967	0.372	0.0277	0.99666	0.17008	0.236503	NOT
PLEKHO1	7425	AP	1	NA	NA	0	0.9818	0.5098	0.042	0.77957	0.09889	0.146845	NOT
PLEKHO1	7426	AP	2	NA	NA	0	0.9818	0.5098	0.042	1.01659	0.09889	0.146845	NOT
PLEKHO1	7427	ES	6	5	7	0	1	0.0257	0.0034	1.00101	0.14178	0.202062	NOT
ANP32E	7429	AP	2	NA	NA	0	0.9521	0.3429	0.047	0.69921	0.00018	0.000430536	DOWN
ANP32E	7430	AP	1.1	NA	NA	0	0.9521	0.3429	0.047	1.0206	0.00018	0.000430536	UP
ANP32E	7431	AA	8.1	7	8.2	0	0.9934	0.273	0.0312	0.9947	0.07291	0.111933	NOT
ANP32E	7432	ES	7	6	8.1	0	0.9967	0.0784	0.0107	1.0001	0.91861	0.93981	NOT
ANP32E	7434	ES	5.1:5.2	4	6	0	0.9983	0.0591	0.0073	0.99847	0.034	0.056414	DOWN
ANP32E	7435	ES	5.1:5.2:6	4	7	0	1	0.0173	0.0015	1.00028	0.3108	0.396158	NOT
ANP32E	7437	ES	4	3	5.1	0	0.9967	0.0384	0.0044	1.00002	0.9702	0.977869	NOT
ANP32E	7438	ES	00:04:05.100000	1.3	5.2	0	0.9983	0.0202	0.0025	0.99998	0.94294	0.958591	NOT
ANP32E	7440	RI	1.2	1.1	1.3	0	0.9967	0.0416	0.0029	0.99974	0.10334	0.15264	NOT
APH1A	7444	RI	6.2	6.1	6.3	0	1	0.5785	0.0461	0.99402	0.41619	0.501703	NOT
APH1A	7445	ES	3	2.2	4	0	0.9983	0.0169	0.0025	1.00028	0.23816	0.315909	NOT
APH1A	7446	AA	2.1	1	2.2	0	0.9983	0.0509	0.0061	0.99805	0.00088	0.00191751	DOWN
C1orf54	7454	AP	3.1	NA	NA	0	0.9967	0.9383	0.1532	0.61841	0	0	DOWN
C1orf54	7455	AP	1	NA	NA	0	0.9967	0.9383	0.1532	1.45162	0	0	UP
C1orf54	7456	ES	7	6	8	0	1	0.531	0.052	0.9985	0.85041	0.886946	NOT
C1orf51	7457	AP	2.1	NA	NA	0	0.9686	0.92	0.1261	2.03853	0	0	UP
C1orf51	7458	AP	1	NA	NA	0	0.9686	0.92	0.1261	0.90858	0	0	DOWN
C1orf51	7459	AA	2.2	1	2.3	0	0.8942	1	0.1616	1.04747	0.58466	0.661623	NOT
MRPS21	7460	AP	1	NA	NA	0	0.9983	0.5187	0.0801	0.99336	0.50312	0.586236	NOT
MRPS21	7461	AP	2.1	NA	NA	0	0.9983	0.5187	0.0801	1.02144	0.50309	0.586236	NOT
PRPF3	7465	AA	10.1	9	10.2	0	0.995	0.2086	0.0321	0.98089	0	0	DOWN
PRPF3	7466	ES	04:05:00	3	6	0	0.9719	0.3206	0.0493	1.01438	0.11277	0.164887	NOT
PRPF3	7467	ES	5	3	6	0	0.9934	0.3344	0.0408	0.98164	0	0	DOWN
PRPF3	7468	ES	4	3	5	0	0.9835	0.8898	0.1814	2.24251	0	0	UP
RPRD2	7470	AT	11.3	NA	NA	0	1	0.1949	0.0106	0.99495	0	0	DOWN
RPRD2	7471	RI	11.2	11.1	11.3	0	0.995	0.2481	0.0383	0.99859	0.78411	0.833408	NOT
RPRD2	7472	ES	4	3.1	5	0	0.9736	0.787	0.0907	1.02335	0.04241	0.0689294	UP
TARS2	7475	ES	08:09:00	7	10	0	0.9983	0.4022	0.0584	1.05132	0	0	UP
[truncated: 35,365 more rows]
